# Supplementary material for: Job strain and supervisor support in primary care health centres and glycaemic control among patients with type 2 diabetes: a cross-sectional study
Source: PubMed Central journal article supplement — BMJ Open. 2013 May 2;3(5):e002297. doi: 10.1136/bmjopen-2012-002297 (PMC3646170; doi:10.1136/bmjopen-2012-002297), 2013-05-02
Supplement: bmjopen-2012-002297.draft_revisions.pdf [file bmjopen-2012-002297.draft_revisions.pdf]

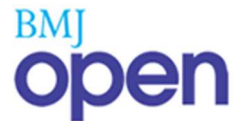

**Job strain in primary care health centres and glycaemic control among patients with type 2 diabetes**

|                                 |                                                                                                                                                                                                                                                                                                                                                                                                                                                                                                                                                                                                                                                                                                                                                                                                                                                                                                    |
|---------------------------------|----------------------------------------------------------------------------------------------------------------------------------------------------------------------------------------------------------------------------------------------------------------------------------------------------------------------------------------------------------------------------------------------------------------------------------------------------------------------------------------------------------------------------------------------------------------------------------------------------------------------------------------------------------------------------------------------------------------------------------------------------------------------------------------------------------------------------------------------------------------------------------------------------|
| Journal:                        | <i>BMJ Open</i>                                                                                                                                                                                                                                                                                                                                                                                                                                                                                                                                                                                                                                                                                                                                                                                                                                                                                    |
| Manuscript ID:                  | bmjopen-2012-002297                                                                                                                                                                                                                                                                                                                                                                                                                                                                                                                                                                                                                                                                                                                                                                                                                                                                                |
| Article Type:                   | Research                                                                                                                                                                                                                                                                                                                                                                                                                                                                                                                                                                                                                                                                                                                                                                                                                                                                                           |
| Date Submitted by the Author:   | 02-Nov-2012                                                                                                                                                                                                                                                                                                                                                                                                                                                                                                                                                                                                                                                                                                                                                                                                                                                                                        |
| Complete List of Authors:       | Koponen, Anne; Hjelt Institute, Public Health; Folkhälsan Research Center, Public Health<br>Vahtera, Jussi; University of Turku, Public Health; Finnish Institute of Occupational Health, Unit of Expertise in Work and Organizations<br>Pitkäniemi, Janne; Hjelt Institute, Public Health<br>Virtanen, Marianna; Finnish Institute of Occupational Health, Unit of Expertise in Work and Organizations<br>Pentti, Jaana; Finnish Institute of Occupational Health, Unit of Expertise in Work and Organizations<br>Simonsen-Rehn, Nina; Hjelt Institute, Public Health; Folkhälsan Research Center, Public Health<br>Kivimäki, Mika; Finnish Institute of Occupational Health, Unit of Expertise in Work and Organizations; University of Helsinki, Institute of Behavioral Sciences<br>Suominen, Sakari; Nordic School of Public Health, Public Health; Folkhälsan Research Center, Public Health |
| <b>Primary Subject Heading</b>: | Health services research                                                                                                                                                                                                                                                                                                                                                                                                                                                                                                                                                                                                                                                                                                                                                                                                                                                                           |
| Secondary Subject Heading:      | Public health                                                                                                                                                                                                                                                                                                                                                                                                                                                                                                                                                                                                                                                                                                                                                                                                                                                                                      |
| Keywords:                       | General diabetes < DIABETES & ENDOCRINOLOGY, Organisation of health services < HEALTH SERVICES ADMINISTRATION & MANAGEMENT, Quality in health care < HEALTH SERVICES ADMINISTRATION & MANAGEMENT, PRIMARY CARE                                                                                                                                                                                                                                                                                                                                                                                                                                                                                                                                                                                                                                                                                     |
|                                 |                                                                                                                                                                                                                                                                                                                                                                                                                                                                                                                                                                                                                                                                                                                                                                                                                                                                                                    |

SCHOLARONE™  
Manuscripts

1  
2  
3 **Job strain in primary care health centres and glycaemic control among**  
4 **patients with type 2 diabetes**  
5  
6  
7  
8  
9

10  
11 **Abstract**

12  
13 **Objectives** This study investigates associations between health care personnel's perceived job  
14 strain and the outcome of care in terms of glycaemic control among patients with type 2 diabetes.  
15  
16

17  
18 **Design** A cross-sectional study in 2006.  
19

20 **Setting** Eighteen primary care health centres (HC) from five municipalities in Finland.  
21

22 **Participants** Aggregated survey data on job strain from health care personnel (n=422) was  
23 combined with registered data from 8975 patients with type 2 diabetes.  
24  
25

26 **Outcome measure** Poor glycaemic control (HbA1c  $\geq 7\%$ ).  
27

28  
29 **Results** Among the 8975 type 2 diabetes patients (51% men, mean age 67 years), the mean HbA1c  
30 level was 7.1 (SD 1.2, range 4.5-19.1), and 43% had poor glyacemic control (HbA1c  $\geq 7\%$ ).  
31  
32 Multilevel logistic regression analyses adjusted for patient's age and sex, and HC- and HC service  
33 area-level characteristics showed that patients' HbA1c-levels were less optimal in high strain HCs  
34 than in low strain HCs (OR 1.44, 95%, CI 1.12-1.86).  
35  
36  
37  
38

39  
40 **Conclusion** Care outcome in type 2 diabetes may be affected by the level of job strain among the  
41 health care personnel.  
42  
43  
44  
45  
46  
47  
48  
49  
50  
51  
52  
53  
54  
55  
56  
57  
58  
59  
60

## ARTICLE SUMMARY

### Article focus

- This paper focuses on the association between job strain of health care personnel and the outcome of care among patients with type 2 diabetes.

### Key messages

- HbA1c-levels were less optimal in health centres where health care personnel's perceived job strain was high compared with health centres where perceived job strain was low.
- The outcome of care in type 2 diabetes may be improved by decreasing job strain of health care personnel in primary care.

### Strengths and limitations of this study

- Previous studies suggest that the organization of care can affect the quality and the outcome of care in diabetes. This study showed that job strain of health care personnel may be one key factor associated with glycaemic control among patients with type 2 diabetes.
- We did not have information on patients' medication and comorbidity associated with type 2 diabetes.

## INTRODUCTION

Diabetes mellitus is an important and increasing public health problem worldwide<sup>1 2 3</sup>. In Finland, about 10% of the population has diabetes of which a majority is of type 2<sup>4</sup>. Primary health care faces a serious challenge to provide high quality care in order to decrease complications, mortality and costs caused by this public health burden.

Health care organizations may differ in the quality of care<sup>5</sup>. However, we know only little about organizational aspects that promote good care of diabetes. One aspect may relate to the organization of care. Collins et al.<sup>6</sup> showed that compliance to diabetes care was better in structured general practitioner (GP) care than in traditional hospital care or in hospital/GP shared care. McLean et al.<sup>7</sup> found that the intermediate outcome target in cholesterol measurement of diabetic patients was achieved more often in urban practices than in very remote rural practices. Medical outcomes of care in type 2 diabetes have been shown to be better in physician-nurse practitioner teams than in care provided by a physician alone<sup>8 9</sup>. Linzer et al.<sup>10</sup> found that good organizational culture with high values alignment with leadership and work control was associated with higher-quality care for diabetic patients. In the study by Virtanen et al.<sup>11</sup> perception of procedural justice among staff was associated with more optimal glycaemic control among patients.

More research on the associations between organizational factors and the quality of care, especially the outcome of care, in diabetes is needed. Based on the theory of Karasek<sup>12</sup> and Karasek & Theorell<sup>13</sup> equilibrium between personnel's job demands and job control as well as social support at work might be important organizational factors associated with the quality of care. Active work with high demands and high control most likely promotes high quality care<sup>13</sup>. High demands give challenges, motivation and promote learning but combined with high control high demands do not cause negative psychological strain. Instead, high-strain work with high demands and low control

1  
2  
3 exhausts personnel and decreases productivity. Low-strain work with high control and low demands  
4  
5 may not offer optimal challenges, and passive work with low demands and low control may lead to  
6  
7 apathy and loss of learned skills and abilities. Besides an optimal balance between job demands and  
8  
9 job control, also social support at work is likely to promote good health, learning and productivity.  
10  
11 Social support can, for example, buffer the negative effect of psychological stressors on employee  
12  
13 health, and co-workers and supervisors are valuable sources of information and expertise.  
14  
15

16  
17  
18 This study investigates associations between health care personnel's perceived job strain and the  
19  
20 outcome of care in terms of glycaemic control among patients with type 2 diabetes. We hypothesize  
21  
22 that glycaemic control is best in health centres where care personnel has possibility to active work  
23  
24 and high supervisor support. The study was conducted in 18 outpatient health centres (HC) clinics  
25  
26 in five municipalities in Finland. Municipalities differed in size (about 7500-200000 inhabitants)  
27  
28 and the number of health centres in each municipality (1-10).  
29  
30  
31

## 32 33 34 **METHODS**

### 35 36 **Study context**

37  
38 In Finland, municipalities are responsible for organizing primary health care services and cover the  
39  
40 costs together with the state. Primary health care services are provided by a health centre  
41  
42 comprising inpatient and outpatient units. Health centres offer a wide range of care services  
43  
44 including doctor and nurse services<sup>14</sup> and have a central role in disease management for major  
45  
46 chronic conditions like diabetes<sup>15</sup>.  
47  
48  
49

### 50 51 52 **Participants**

53  
54 This study was part of the Finnish Public Sector Study which was approved by the ethics committee  
55  
56 of the Finnish Institute of Occupational Health. Local government personnel of the participating  
57  
58  
59

1  
2  
3 towns responded to a voluntary-basis questionnaire in 2006. The 18 HCs provided anonymous  
4 register-data of all HbA1c-values measured in 2006 of all patients in outpatient care with type 2  
5 diabetes (n=8975).  
6  
7  
8  
9

## 10 11 **Measures**

### 12 Job strain

13  
14 Aggregated measures of job strain were derived from the responses of doctors and nurses (n=422,  
15 response rate 79%) to questions measuring job demands (5 items) and job control (9 items) derived  
16 from the Job Content Questionnaire<sup>16</sup> and social support from the supervisor (4 items)<sup>17</sup>. A 5-point  
17 Likert-type response format ranging from 1 (totally agree) to 5 (totally disagree) was used for all  
18 items. A mean score for the constructs was computed and the individual scores were then used to  
19 measure aggregated scores of job strain and supervisor support for each work unit based on the  
20 identification of each participant's work unit obtained from employers' administrative records. To  
21 create a job strain indicator for each work unit, aggregated demands and control were split on the  
22 median and combined to four categories: low strain jobs (low demands combined with high  
23 control), active jobs (high demands combined with high control), passive jobs (low demands  
24 combined with low control), and high strain jobs (high demands combined with low control)<sup>12</sup>. To  
25 create a supervisor support indicator for each work unit, aggregated supervisor support was split  
26 into three equal groups indicating low, medium and high support.  
27  
28  
29  
30  
31  
32  
33  
34  
35  
36  
37  
38  
39  
40  
41  
42  
43  
44  
45  
46

### 47 Glycaemic control

48  
49 Glycaemic control was determined by one-year glycated haemoglobin (HbA1c) value which also  
50 was used as an outcome in the statistical analyses. In case of several control measurements the  
51 mean HbA1c-value was calculated (mean number of measurements was 2.1, range 1-15). Of the  
52  
53  
54  
55  
56  
57  
58  
59  
60

1  
2  
3 patients, 35% had one measurement. We used a value under 7% to indicate good and a value of 7 or  
4  
5 higher to indicate poor glycaemic control<sup>18</sup>.  
6  
7

### 8 9 **Background variables**

10  
11 *Patient characteristics:* Information on age, sex, and the postal zip code of area of residence of each  
12  
13 patient was obtained from the HCs registers.  
14

15  
16 *HC characteristics:* The percentage of fixed-term HC personnel and the mean rate of sickness  
17  
18 absence days in the work unit were drawn from employers' registers<sup>19</sup>.  
19

20  
21 *HC service area characteristics:* By using the patient postal zip codes and data obtained from  
22  
23 Statistics Finland we formulated the average educational level (percentage of adults aged >18 years  
24  
25 whose highest education level is elementary school), the median income and the unemployment rate  
26  
27 (unemployed persons belonging to the workforce divided by total workforce) of the residents in the  
28  
29 HC catchment area, that is, the population-weighted means for residents in the specific areas that  
30  
31 each HC served. The mean for each variable for each HC was calculated and linked to individual  
32  
33 data on each patient. Educational level, income and unemployment rate are standard variables to  
34  
35 characterize areal disadvantage and deprivation<sup>20 21</sup>.  
36  
37  
38  
39

### 40 41 **Statistical analysis**

42  
43 Descriptive statistics were estimated and the baseline associations between independent  
44  
45 variables, covariates and glycaemic control were tested with Pearson chi<sup>2</sup>-tests or one-way  
46  
47 analysis of variance depending on the measurement scale of the variable of interest. Because  
48  
49 the patients were nested within the 18 HC units, we used a two-level modelling to account the  
50  
51 data structure with job strain at the second level and the outcome – patient-level glycaemic  
52  
53 control – at the first level. We fitted five models using the multilevel logistic regression  
54  
55 analysis. The first model, an empty model including only the random effect variable, was used  
56  
57  
58  
59  
60

1  
2  
3 to examine the clustering of the outcome between the 18 HCs. Then, we added job strain to  
4  
5 examine its associations with the outcome. Next, we added patient-level confounders, after  
6  
7 that HC characteristics and finally, variables describing socioeconomic composition of the  
8  
9 HC service area (unadjusted model, model I, II and III). Because we used register data  
10  
11 combined with aggregated variables describing HCs and HC catchment areas, there were only  
12  
13 a few missing cases, and they were not included in the analyses. Statistical analyses were  
14  
15 performed using SPSS version 19.0 and R-program, version 2.13.0.  
16  
17  
18  
19

## 20 21 RESULTS

22  
23 Tables 1-2 show baseline associations between independent variables, covariates and  
24  
25 glycaemic control. Of the 8975 type 2 diabetes patients, 51% were men, and the mean age  
26  
27 was 67 years (SD 11, range 16-106 years). The mean HbA1c level of patients was 7.1 (SD  
28  
29 1.2, range 4.5-19.1), and 43% had poor glycaemic control ( $\geq 7\%$ ). The mean percentage of  
30  
31 personnel with fixed term job contract in HCs was 22% and the average amount of sickness  
32  
33 absence days was 14 days. The socioeconomic characteristics of the HC service area were as  
34  
35 follows: residents with more than basic education in the patients' neighbourhood 73%, the  
36  
37 median yearly income 17203 euros, and the mean unemployment rate 7%. The mean rates of  
38  
39 job control, job demands and supervisor support at the HCs were 3.9, 3.6 and 3.6,  
40  
41 respectively.  
42  
43  
44

45 [Insert tables 1-2 somewhere here]  
46  
47  
48

49  
50 Table 3 shows that after adjustment for all covariates (model III) glycaemic control among  
51  
52 patients was less optimal in HCs where care personnel's perceived job strain was high  
53  
54 compared with HCs where job strain was low. Active and passive work HCs did not differ  
55  
56  
57  
58  
59  
60



1  
2  
3 statistically significantly from low strain HCs in the outcome of care. Also, supervisor support  
4  
5 was not associated with patients' glycaemic control (table 4).  
6

7 [Insert tables 3-4 somewhere here]  
8

## 9 10 **DISCUSSION**

11 This study showed that exposure to high job strain of primary health care personnel may be  
12 associated with worse outcome of diabetes care. Glycaemic control among type 2 diabetes  
13 patients was less optimal in high strain HCs than in low strain HCs. Supervisor support was  
14 not associated with the outcome of care.  
15  
16  
17  
18  
19

20  
21  
22 Several studies have shown the strong association between experienced work load and  
23 burnout, particularly its exhaustion dimension<sup>22 23 24</sup>. Emotional exhaustion is further  
24 associated with low job performance shown in job withdrawal, deterioration of productivity  
25 and effectiveness<sup>24</sup>, and the outcome of care<sup>5 25</sup>. Exhausted employees are not effective,  
26 accurate or innovative at work<sup>13</sup>. Instead, a favourable psychosocial work environment may  
27 enhance employee well-being and motivate health care personnel to invent new working  
28 methods and strengthen patients' motivation to self-care.  
29  
30  
31  
32  
33  
34  
35  
36  
37  
38  
39

40 However, patients' glycaemic control was not best in active work HCs as we predicted based  
41 on the job strain model<sup>13</sup>. It is possible that active work assumption does not fit well in the  
42 health care sector. Active jobs give more challenges than low strain jobs or passive jobs but  
43 the motivational potential of higher demands of active jobs may be lost if demands are so high  
44 that they overwhelm health care personnel's capacities. In that case high control or other job  
45 resources may have only limited capability of buffering the undesired impact of high job  
46 demands<sup>22 26</sup>.  
47  
48  
49  
50  
51  
52  
53  
54  
55  
56  
57  
58  
59  
60

1  
2  
3 Register data give reliable care results but also has limitations. It does not give information on  
4 patients' socioeconomic status, such as educational level that is known to be strongly related  
5 with health behaviour<sup>27</sup>. Healthy lifestyle is the key factor in management of diabetes<sup>18</sup>.  
6  
7  
8 However, we were able to use disadvantage of the patient's residential area as a proxy for  
9 individual socioeconomic position. Indeed, the effect of job strain on glycaemic control  
10 emerged after adjustment of educational level, income and unemployment rate in the HC  
11 catchment area. Another limitation was that we did not have information on patients'  
12 medication and comorbidity associated with type 2 diabetes<sup>28</sup>.  
13  
14  
15  
16  
17  
18  
19

20  
21  
22  
23 Further, we did not have access to exact information on where the principal care responsibility  
24 of the patients was. In spite of the fact that the patients had HbA1c-values measured via the  
25 HC it is possible that some of them, at least the younger ones, had also visited separate private  
26 or specialized public occupational health care units. In these cases, the psychosocial work  
27 environment of these units is more crucial for the outcome of care. However, the majority of  
28 the patients in the data were over 64 years old with many visits to the HC during 2006. Thus,  
29 it is unlikely that their main care responsibility would have been somewhere else. Also, the  
30 municipalities now studied, did not systematically differ in availability of care from  
31 occupational health care units.  
32  
33  
34  
35  
36  
37  
38  
39  
40  
41  
42  
43  
44

45 This and previous studies suggest that the organization of care affects the quality and the  
46 outcome of care<sup>5 11</sup>. However, research evidence is still limited. Follow-up studies  
47 investigating the effect of changes in the psychosocial work environment of health care  
48 personnel on change in glycaemic control of patients with type 2 diabetes, are needed as well  
49 as interventions aiming at improving psychosocial work environment in health care.  
50  
51  
52  
53  
54  
55  
56  
57  
58  
59  
60

1  
2  
3 maintaining good control is essential in order to prevent micro- and macrovascular  
4 complications of diabetes and costs caused by these chronic diseases related to type 2  
5 diabetes<sup>1</sup>.  
6  
7  
8  
9

### 10 11 **Funding statement**

12  
13 The work was supported by the Academy of Finland (The Finnish public sector study, projects  
14 1129262, 129262) and the participating organizations.  
15  
16

### 17 18 **Competing Interest**

19  
20 None to declare  
21  
22  
23

### 24 25 **Contributorship statement**

26  
27 Anne Koponen, the guarantor, formulated the initial hypotheses, designed the study, analyzed and  
28 interpreted data, and wrote the manuscript. Jussi Vahtera, Sakari Suominen, Marianna Virtanen and  
29 Mika Kivimäki formulated the initial hypotheses, designed the study, contributed to interpretation  
30 of the data, and reviewed/edited the manuscript. Nina Simonsen-Rehn designed the study,  
31 contributed to interpretation of the data, and reviewed/edited the manuscript. Jaana Pentti designed  
32 the study, analyzed data, contributed to interpretation of the data, and reviewed/edited the  
33 manuscript. Janne Pitkäniemi analyzed data, contributed to interpretation of the data, and  
34 reviewed/edited the manuscript.  
35  
36  
37  
38  
39  
40  
41  
42  
43  
44  
45  
46  
47

### 48 49 **Data Sharing**

50 We have no additional unpublished data from the study.  
51  
52  
53  
54  
55  
56  
57  
58  
59  
60

## References:

- 1 Fowler MJ. Microvascular and macrovascular complications of diabetes. *Clin Diab* 2008;**26**:77-82.
- 2 Al Khaja KAJ, Sequeira RP, Damanhori AHH. Comparison of the quality of diabetes care in primary care diabetic clinics and general practice clinics. *Diab Res Clin Pract* 2005;**70**:174-82.
- 3 Mathers CD, Loncar D. Projections of global mortality and burden of disease from 2002 to 2030. *PLoS Med* 2006;**3**:e442. doi:10.1371/journal.pmed.0030442
- 4 Koski S. Diabetesbarometri 2010. [Diabetes Barometer]. Suomen Diabetesliitto ry. Kehitys Oy 2011.
- 5 Aiken LH, Clarke SP, Sloane DM. Hospital staffing, organization, and quality of care: Cross-national findings. *Nurs Outlook* 2002a;**50**:187-94.
- 6 Collins MM, O'Sullivan T, Harkins V, Perry IJ. Quality of life and quality of care in patients with diabetes experiencing different models of care. *Diab Care* 2009;**32**:603-5.
- 7 McLean G, Guthrie B, Sutton M. Differences in the quality of primary medical care services by remoteness from urban settlements. *Qual Saf Health Care* 2007;**16**:446-9.
- 8 Litaker D, Mion LC, Planavsky L, et al. Physician – nurse practitioner teams in chronic disease management: the impact on costs, clinical effectiveness, and patients' perception of care. *J Interprof Care* 2003;**17**:223-37.
- 9 Taylor CB, Miller NH, Reilly KR, et al. Evaluation of a nurse-care management system to improve outcomes in patients with complicated diabetes. *Diab Care* 2003;**26**:1058-63.
- 10 Linzer M, Baier Manwell L, Williams ES, et al. Working conditions in primary care: physician reactions and care quality. *Ann Intern Med* 2009;**151**:28-36.

- 1  
2  
3 11 Virtanen M, Oksanen T, Kawachi I, et al. Organizational justice in primary care health  
4 center and glycemic control among patients. *Med Care* 2012;**50**:831-5.  
5  
6  
7 12 Karasek RA. Job demands, job decision latitude, and mental strain: Implications for job  
8 redesign. *Adm Sci Q* 1979;**24**:285-308.  
9  
10  
11 13 Karasek RA, Theorell T. Healthy work. Stress, productivity, and the reconstruction of  
12 working life. New York: Basic Books 1990.  
13  
14  
15 14 Laamanen R, Simonsen-Rehn N, Suominen S, et al. Outsourcing primary health care  
16 services – How politicians explain the grounds for their decisions. *Health Policy* 2008;**88**:294-  
17 307.  
18  
19  
20  
21  
22 15 Teperi J, Porter ME, Vuorenkoski L, Baron JF. The Finnish health care system: a value-  
23 based perspective. *Sitra Reports* 2009;**82**. Helsinki: Sitra.  
24  
25  
26  
27 16 Karasek RA. Job Content Questionnaire and User's Guide. Revision 1.1. Los Angeles:  
28 Department of Industrial and Systems Engineering. University of Southern Los Angeles 1985.  
29  
30  
31 17 Vahtera J, Kivimäki M, Pentti J, Theorell T. Effect of change in the psychosocial work  
32 environment on sickness absence: a 7-year follow-up of initially healthy employees. *JECH*  
33 2000;**54**:484-93.  
34  
35  
36  
37 18 American Diabetes Association. Standards of medical care in diabetes - 2011. *Diab Care*  
38 2011;**34**(Suppl 1):P11-61.  
39  
40  
41  
42 19 Virtanen M, Kivimäki M, Pentti J, et al. School neighborhood disadvantage as a predictor  
43 of long-term sick leave among teachers: Prospective cohort study. *Am J Epidemiol*  
44 2010;**171**:785-92.  
45  
46  
47  
48 20 Kim D, Masyn KE, Kawachi I, et al. Neighborhood socioeconomic status and behavioral  
49 pathways to risks of colon and rectal cancer in women. *Cancer* 2010;**116**:4187-96.  
50  
51  
52  
53 21 Diez Roux AV, Merkin SS, Arnett D, et al. Neighborhood of residence and incidence of  
54 coronary heart disease. *New Engl J Med* 2001;**345**:99-106.  
55  
56  
57  
58  
59  
60

1  
2  
3 22 Bakker AB, Demerouti E, Verbeke, W. Using the job demands-resources model to predict  
4 burnout and performance. HRM 2004;**43**:83-104.

5  
6  
7 23 Koponen AM, Laamanen R, Simonsen-Rehn N, et al. Psychosocial work environment and  
8 emotional exhaustion – Does a service provision model play a role? Health Policy,  
9 2010;**94**:111-19.

10  
11  
12 24 Maslach C, Schaufeli WB, Leiter MP. Job burnout. Annu Rev Psychol 2001;**52**:397-422.

13  
14  
15 25 Aiken LH, Clarke SP, Sloane DM, et al. Hospital nurse staffing and patient mortality,  
16 nurse burnout, and job dissatisfaction. JAMA 2002b;**288**:1987-93.

17  
18  
19  
20  
21 26 Koponen A, Laamanen R, Simonsen-Rehn N, Suominen S. Perusterveydenhuollon ja  
22 sosiaalitoimen henkilöstön työolot ja työuupumus neljässä kunnassa – Onko  
23 palvelutuotantomallilla väliä? [Psychosocial work environment and emotional exhaustion of  
24 primary health care and social sector personnel in four municipalities – Does a service  
25 provision model play a role?]. Sosiaalilääketieteellinen aikakauslehti 2007;**3**:163-175.

26  
27  
28  
29  
30  
31 27 Laaksonen M, Talala K, Martelin T, et al. Health behaviours as explanations for  
32 educational level differences in cardiovascular and all-cause mortality: a follow-up of 60000  
33 men and women over 23 years. EJPH 2008;**18**:38-43.

34  
35  
36  
37  
38  
39 28 Unwin N, Whiting D, Roglic G. Social determinants of diabetes and challenges of  
40 prevention. The Lancet 2010;**375**:2204-2205.

Table 1. Patient, health centre, and health centre service area characteristics in primary care health centre (HCs) varying in job strain (n=8975).

| Job strain in primary care health centre                |                   |                   |                    |                   |                        |         |
|---------------------------------------------------------|-------------------|-------------------|--------------------|-------------------|------------------------|---------|
|                                                         | All HCs<br>(n=18) | Low strain<br>HCs | Passive<br>job HCs | Active<br>job HCs | High strain<br>job HCs | p-value |
| <i>Patient characteristics</i>                          |                   |                   |                    |                   |                        |         |
| Percentage of men <sup>1</sup>                          | 51                | 50                | 48                 | 54                | 52                     | <.001   |
| Mean age <sup>2</sup>                                   | 67                | 67                | 68                 | 66                | 65                     | <.001   |
| Patients with poor glycaemic control (%) <sup>1</sup>   | 43                | 45                | 42                 | 42                | 46                     | <.05    |
| <i>HC characteristics</i>                               |                   |                   |                    |                   |                        |         |
| Personnel with fixed term job contract (%) <sup>1</sup> | 22                | 28                | 12                 | 30                | 16                     | <.001   |
| Staff sickness absence days (mean) <sup>2</sup>         | 14                | 9                 | 17                 | 12                | 16                     | <.001   |
| <i>Socioeconomic composition of HC service area</i>     |                   |                   |                    |                   |                        |         |
| Percentage of the lowest educational level <sup>1</sup> | 27                | 29                | 26                 | 25                | 27                     | <.001   |
| Median income level in the HC service area <sup>2</sup> | 17203             | 15660             | 16097              | 18951             | 18280                  | <.001   |
| Unemployment rate (mean) <sup>2</sup>                   | 7                 | 7                 | 10                 | 4                 | 6                      | <.001   |

1)  $\chi^2$ -test

2) 1-way ANOVA

Table 2. Patient, health centre, and health centre service area characteristics in primary care health centres (HCs) varying in supervisor support (n=8975).

| Supervisor support in primary care health centre        |                   |                    |                         |                     |         |
|---------------------------------------------------------|-------------------|--------------------|-------------------------|---------------------|---------|
|                                                         | All HCs<br>(n=18) | Low support<br>HCs | Moderate<br>support HCs | High<br>support HCs | p-value |
| <i>Patient characteristics</i>                          |                   |                    |                         |                     |         |
| Percentage of men <sup>1</sup>                          | 51                | 48                 | 54                      | 52                  | <.001   |
| Mean age <sup>2</sup>                                   | 67                | 67                 | 66                      | 65                  | <.001   |
| Patients with poor glycaemic control (%) <sup>1</sup>   | 43                | 44                 | 44                      | 41                  | ns.     |
| <i>HC characteristics</i>                               |                   |                    |                         |                     |         |
| Personnel with fixed term job contract (%) <sup>1</sup> | 22                | 12                 | 31                      | 26                  | <.001   |
| Staff sickness absence days (mean) <sup>2</sup>         | 14                | 15                 | 14                      | 10                  | <.001   |
| <i>Socioeconomic composition of HC service area</i>     |                   |                    |                         |                     |         |
| Percentage of the lowest educational level <sup>1</sup> | 27                | 28                 | 26                      | 25                  | <.001   |
| Median income level, euros <sup>2</sup>                 | 17203             | 15173              | 18971                   | 18429               | <.001   |
| Unemployment rate (mean) <sup>2</sup>                   | 7                 | 10                 | 5                       | 5                   | <.01    |

1)  $\chi^2$ -test

2) 1-way ANOVA



Table 3. Level of perceived job strain among the health care personnel (doctors and nurses) as a predictor of poor glycaemic control indicator (HbA1c $\geq$ 7%) in patients with type 2 diabetes (n=8975) in primary care health centres (HCs).

| Job strain in the HCs | Unadjusted model |         | Model I*         |         | Model II**       |         | Model III***     |         |
|-----------------------|------------------|---------|------------------|---------|------------------|---------|------------------|---------|
|                       | OR (95% CI)      | p-value |
| <i>Fixed effects</i>  |                  |         |                  |         |                  |         |                  |         |
| Low strain job        | 1.00             |         | 1.00             |         | 1.00             |         | 1.00             |         |
| Passive job           | 0.96 (0.72-1.27) | ns.     | 0.96 (0.72-1.27) | ns.     | 0.97 (0.70-1.36) | ns.     | 1.08 (0.86-1.36) | ns.     |
| Active job            | 0.89 (0.68-1.18) | ns.     | 0.89 (0.67-1.19) | ns.     | 0.91 (0.69-1.20) | ns.     | 1.17 (0.96-1.43) | ns.     |
| High strain job       | 1.08 (0.80-1.47) | ns.     | 1.09 (0.80-1.48) | ns.     | 1.10 (0.78-1.56) | ns.     | 1.44 (1.12-1.86) | <.01    |
| <i>Random effects</i> |                  |         |                  |         |                  |         |                  |         |
| HC variance (SE)      | 0.04 (0.05)      |         | 0.04 (0.05)      |         | 0.04 (0.04)      |         | 0.01 (0.02)      |         |

Multilevel regression analysis

\*Adjusted for patient characteristics (sex and age)

\*\*Adjusted as model I + HC characteristics (the percentage of fixed-term HC personnel and the mean rate of sickness absence days in the HC)

\*\*\* Adjusted as model II + HC service area characteristics (educational level of the residents, median income and unemployment rate)

Table 4. Level of perceived supervisor support among the health care personnel (doctors and nurses) as a predictor of poor glycaemic control indicator ( $HbA1c \geq 7\%$ ) in patients with type 2 diabetes ( $n=8975$ ) in primary care health centres (HCs).

| Supervisor support in the HCs | Unadjusted model |         | Model I*         |         | Model II**       |         | Model III***     |         |
|-------------------------------|------------------|---------|------------------|---------|------------------|---------|------------------|---------|
|                               | OR (95% CI)      | p-value |
| <i>Fixed effects</i>          |                  |         |                  |         |                  |         |                  |         |
| <b>High support</b>           | 1.00             |         | 1.00             |         | 1.00             |         | 1.00             |         |
| <b>Medium support</b>         | 1.11 (0.86-1.43) | ns.     | 1.11 (0.86-1.43) | ns.     | 1.17 (0.90-1.53) | ns.     | 1.14 (0.95-1.36) | ns.     |
| <b>Low support</b>            | 1.13 (0.88-1.45) | ns.     | 1.13 (0.88-1.45) | ns.     | 1.10 (0.84-1.44) | ns.     | 0.87 (0.65-1.16) | ns.     |
| <i>Random effects</i>         |                  |         |                  |         |                  |         |                  |         |
| <b>HC variance</b>            | 0.04             |         | 0.04             |         | 0.03             |         | 0.01             |         |
| <b>(SE)</b>                   | 0.05             |         | 0.05             |         | 0.04             |         | 0.02             |         |

Multilevel regression analysis

\*Adjusted for patient characteristics (sex and age)

\*\*Adjusted as model I + HC characteristics (the percentage of fixed-term HC personnel and the mean rate of sickness absence days in the HC)

\*\*\* Adjusted as model II + HC service area characteristics (educational level of the residents, median income and unemployment rate)

STROBE 2007 (v4) Statement—Checklist of items that should be included in reports of *cross-sectional studies*

| Section/Topic                | Item # | Recommendation                                                                                                                                                                       | Reported on page #                                  |
|------------------------------|--------|--------------------------------------------------------------------------------------------------------------------------------------------------------------------------------------|-----------------------------------------------------|
| Title and abstract           | 1      | (a) Indicate the study's design with a commonly used term in the title or the abstract                                                                                               | 1                                                   |
|                              |        | (b) Provide in the abstract an informative and balanced summary of what was done and what was found                                                                                  | 2                                                   |
| <b>Introduction</b>          |        |                                                                                                                                                                                      |                                                     |
| Background/rationale         | 2      | Explain the scientific background and rationale for the investigation being reported                                                                                                 | 4-5                                                 |
| Objectives                   | 3      | State specific objectives, including any prespecified hypotheses                                                                                                                     | 5                                                   |
| <b>Methods</b>               |        |                                                                                                                                                                                      |                                                     |
| Study design                 | 4      | Present key elements of study design early in the paper                                                                                                                              | 5-6                                                 |
| Setting                      | 5      | Describe the setting, locations, and relevant dates, including periods of recruitment, exposure, follow-up, and data collection                                                      | 5-6                                                 |
| Participants                 | 6      | (a) Give the eligibility criteria, and the sources and methods of selection of participants                                                                                          | 5-6                                                 |
| Variables                    | 7      | Clearly define all outcomes, exposures, predictors, potential confounders, and effect modifiers. Give diagnostic criteria, if applicable                                             | 6-7                                                 |
| Data sources/<br>measurement | 8*     | For each variable of interest, give sources of data and details of methods of assessment (measurement). Describe comparability of assessment methods if there is more than one group | 6-7                                                 |
| Bias                         | 9      | Describe any efforts to address potential sources of bias                                                                                                                            | 6 (all patients with type 2 diabetes were included) |
| Study size                   | 10     | Explain how the study size was arrived at                                                                                                                                            | 5-6                                                 |
| Quantitative variables       | 11     | Explain how quantitative variables were handled in the analyses. If applicable, describe which groupings were chosen and why                                                         | 6-7                                                 |
| Statistical methods          | 12     | (a) Describe all statistical methods, including those used to control for confounding                                                                                                | 7-8                                                 |
|                              |        | (b) Describe any methods used to examine subgroups and interactions                                                                                                                  |                                                     |
|                              |        | (c) Explain how missing data were addressed                                                                                                                                          | 8                                                   |
|                              |        | (d) If applicable, describe analytical methods taking account of sampling strategy                                                                                                   |                                                     |

|                          |     |                                                                                                                                                                                                                                                                                                                                                                                                               |                          |
|--------------------------|-----|---------------------------------------------------------------------------------------------------------------------------------------------------------------------------------------------------------------------------------------------------------------------------------------------------------------------------------------------------------------------------------------------------------------|--------------------------|
|                          |     | (e) Describe any sensitivity analyses                                                                                                                                                                                                                                                                                                                                                                         |                          |
| <b>Results</b>           |     |                                                                                                                                                                                                                                                                                                                                                                                                               |                          |
| Participants             | 13* | (a) Report numbers of individuals at each stage of study—eg numbers potentially eligible, examined for eligibility, confirmed eligible, included in the study, completing follow-up, and analysed<br>(b) Give reasons for non-participation at each stage<br>(c) Consider use of a flow diagram                                                                                                               | 5-7, 15-18               |
| Descriptive data         | 14* | (a) Give characteristics of study participants (eg demographic, clinical, social) and information on exposures and potential confounders<br>(b) Indicate number of participants with missing data for each variable of interest                                                                                                                                                                               | 8, 15-16                 |
| Outcome data             | 15* | Report numbers of outcome events or summary measures                                                                                                                                                                                                                                                                                                                                                          |                          |
| Main results             | 16  | (a) Give unadjusted estimates and, if applicable, confounder-adjusted estimates and their precision (eg, 95% confidence interval). Make clear which confounders were adjusted for and why they were included<br>(b) Report category boundaries when continuous variables were categorized<br>(c) If relevant, consider translating estimates of relative risk into absolute risk for a meaningful time period | 8, 10, 15-18<br>6, 17-18 |
| Other analyses           | 17  | Report other analyses done—eg analyses of subgroups and interactions, and sensitivity analyses                                                                                                                                                                                                                                                                                                                |                          |
| <b>Discussion</b>        |     |                                                                                                                                                                                                                                                                                                                                                                                                               |                          |
| Key results              | 18  | Summarise key results with reference to study objectives                                                                                                                                                                                                                                                                                                                                                      | 8-9                      |
| Limitations              | 19  | Discuss limitations of the study, taking into account sources of potential bias or imprecision. Discuss both direction and magnitude of any potential bias                                                                                                                                                                                                                                                    | 10                       |
| Interpretation           | 20  | Give a cautious overall interpretation of results considering objectives, limitations, multiplicity of analyses, results from similar studies, and other relevant evidence                                                                                                                                                                                                                                    | 10                       |
| Generalisability         | 21  | Discuss the generalisability (external validity) of the study results                                                                                                                                                                                                                                                                                                                                         | 10-11                    |
| <b>Other information</b> |     |                                                                                                                                                                                                                                                                                                                                                                                                               |                          |
| Funding                  | 22  | Give the source of funding and the role of the funders for the present study and, if applicable, for the original study on which the present article is based                                                                                                                                                                                                                                                 | 11                       |

\*Give information separately for cases and controls in case-control studies and, if applicable, for exposed and unexposed groups in cohort and cross-sectional studies.

**Note:** An Explanation and Elaboration article discusses each checklist item and gives methodological background and published examples of transparent reporting. The STROBE checklist is best used in conjunction with this article (freely available on the Web sites of PLoS Medicine at <http://www.plosmedicine.org/>, Annals of Internal Medicine at <http://www.annals.org/>, and Epidemiology at <http://www.epidem.com/>). Information on the STROBE Initiative is available at [www.strobe-statement.org](http://www.strobe-statement.org).



**Job strain and supervisor support in primary care health centres and glycaemic control among patients with type 2 diabetes – a cross-sectional study**

|                                 |                                                                                                                                                                                                                                                                                                                                                                                                                                                                                                                                                                                                                                                                                                                                                                                                                                                                                                    |
|---------------------------------|----------------------------------------------------------------------------------------------------------------------------------------------------------------------------------------------------------------------------------------------------------------------------------------------------------------------------------------------------------------------------------------------------------------------------------------------------------------------------------------------------------------------------------------------------------------------------------------------------------------------------------------------------------------------------------------------------------------------------------------------------------------------------------------------------------------------------------------------------------------------------------------------------|
| Journal:                        | <i>BMJ Open</i>                                                                                                                                                                                                                                                                                                                                                                                                                                                                                                                                                                                                                                                                                                                                                                                                                                                                                    |
| Manuscript ID:                  | bmjopen-2012-002297.R1                                                                                                                                                                                                                                                                                                                                                                                                                                                                                                                                                                                                                                                                                                                                                                                                                                                                             |
| Article Type:                   | Research                                                                                                                                                                                                                                                                                                                                                                                                                                                                                                                                                                                                                                                                                                                                                                                                                                                                                           |
| Date Submitted by the Author:   | 24-Jan-2013                                                                                                                                                                                                                                                                                                                                                                                                                                                                                                                                                                                                                                                                                                                                                                                                                                                                                        |
| Complete List of Authors:       | Koponen, Anne; Hjelt Institute, Public Health; Folkhälsan Research Center, Public Health<br>Vahtera, Jussi; University of Turku, Public Health; Finnish Institute of Occupational Health, Unit of Expertise in Work and Organizations<br>Pitkäniemi, Janne; Hjelt Institute, Public Health<br>Virtanen, Marianna; Finnish Institute of Occupational Health, Unit of Expertise in Work and Organizations<br>Pentti, Jaana; Finnish Institute of Occupational Health, Unit of Expertise in Work and Organizations<br>Simonsen-Rehn, Nina; Hjelt Institute, Public Health; Folkhälsan Research Center, Public Health<br>Kivimäki, Mika; Finnish Institute of Occupational Health, Unit of Expertise in Work and Organizations; University of Helsinki, Institute of Behavioral Sciences<br>Suominen, Sakari; Nordic School of Public Health, Public Health; Folkhälsan Research Center, Public Health |
| <b>Primary Subject Heading</b>: | Health services research                                                                                                                                                                                                                                                                                                                                                                                                                                                                                                                                                                                                                                                                                                                                                                                                                                                                           |
| Secondary Subject Heading:      | Public health                                                                                                                                                                                                                                                                                                                                                                                                                                                                                                                                                                                                                                                                                                                                                                                                                                                                                      |
| Keywords:                       | General diabetes < DIABETES & ENDOCRINOLOGY, Organisation of health services < HEALTH SERVICES ADMINISTRATION & MANAGEMENT, Quality in health care < HEALTH SERVICES ADMINISTRATION & MANAGEMENT, PRIMARY CARE                                                                                                                                                                                                                                                                                                                                                                                                                                                                                                                                                                                                                                                                                     |
|                                 |                                                                                                                                                                                                                                                                                                                                                                                                                                                                                                                                                                                                                                                                                                                                                                                                                                                                                                    |

SCHOLARONE™  
Manuscripts

1  
2  
3 **Job strain and supervisor support in primary care health centres and**  
4 **glycaemic control among patients with type 2 diabetes – a cross-sectional**  
5 **study**  
6  
7  
8  
9

10  
11  
12  
13 **Abstract**  
14

15 **Objectives** This study investigates associations between health care personnel's perceived job  
16 strain, supervisor support and the outcome of care in terms of glycaemic control among patients  
17 with type 2 diabetes.  
18  
19

20  
21 **Design** A cross-sectional study in 2006.  
22

23  
24 **Setting** Eighteen primary care health centres (HCs) from five municipalities in Finland.  
25

26  
27 **Participants** Aggregated survey data on perceived job strain and supervisor support from health  
28 care personnel (doctors, n=122, mean age 45.5 years, nurses, n=300, mean age 47.1 years) was  
29 combined with registered data from 8975 patients (51% men, mean age 67 years) with type 2  
30 diabetes.  
31  
32  
33  
34

35  
36 **Outcome measure** Poor glycaemic control (HbA1c  $\geq 7\%$ ).  
37

38  
39 **Results** The mean HbA1c-level among the patients with type 2 diabetes was 7.1 (SD 1.2, range 4.5-  
40 19.1), and 43% had poor glyacemic control (HbA1c  $\geq 7\%$ ). Multilevel logistic regression analyses  
41 adjusted for patient's age and sex, and HC- and HC service area-level characteristics showed that  
42 patients' HbA1c-levels were less optimal in high strain HCs than in low strain HCs (OR 1.44, 95%,  
43 CI 1.12-1.86). Supervisor support in HCs was not associated with the outcome of care.  
44  
45  
46  
47

48  
49 **Conclusion** The level of job strain among the health care personnel may play a role in achieving  
50 good glycaemic control among patients with type 2 diabetes.  
51  
52  
53  
54  
55  
56  
57  
58  
59  
60

## ARTICLE SUMMARY

### Article focus

- This paper focuses on the association between job strain and supervisor support of health care personnel and the outcome of care among patients with type 2 diabetes.

### Key messages

- HbA1c-levels were less optimal in health centres where health care personnel's perceived job strain was high compared with health centres where perceived job strain was low.
- Perceived job strain of health care personnel and health centres' success in achieving glycaemic control of patients with diabetes might be good quality indicators of patient care.

### Strengths and limitations of this study

- Previous studies suggest that the organization of care can affect the quality and the outcome of care in diabetes. This study showed that job strain of health care personnel may be one key factor associated with glycaemic control among patients with type 2 diabetes.
- We did not have information on patients' medication and comorbidity associated with type 2 diabetes.

## INTRODUCTION

Diabetes mellitus is an important and increasing public health problem worldwide<sup>1 2 3</sup>. In Finland, about 10% of the population has diabetes of which a majority is of type 2<sup>4</sup>. Primary health care faces a serious challenge to provide high quality care in order to decrease complications, mortality and costs caused by this public health burden.

Health care organizations may differ in the quality of care<sup>5</sup>. However, we know only little about organizational aspects that promote good care of diabetes. One aspect may relate to the organization of care. Collins et al.<sup>6</sup> showed that compliance to diabetes care was better in structured general practitioner (GP) care than in traditional hospital care or in hospital/GP shared care. McLean et al.<sup>7</sup> found that the intermediate outcome target in cholesterol measurement of diabetic patients was achieved more often in urban practices than in very remote rural practices. Medical outcomes of care in type 2 diabetes have been shown to be better in physician-nurse practitioner teams than in care provided by a physician alone<sup>8 9</sup>. Linzer et al.<sup>10</sup> found that good organizational culture with high values alignment with leadership and work control was associated with higher-quality care for diabetic patients. In the study by Virtanen et al.<sup>11</sup> perception of procedural justice among staff was associated with more optimal glycaemic control among patients.

More research on the associations between organizational factors and the quality of care, especially the outcome of care, in diabetes is needed. Based on the theory of Karasek<sup>12</sup> and Karasek & Theorell<sup>13</sup> equilibrium between personnel's job demands and job control as well as social support at work might be important organizational factors associated with the quality of care. Active work with high demands and high control most likely promotes high quality care<sup>13</sup>. High demands give challenges, motivation and promote learning but combined with high control high demands do not cause negative psychological strain. Instead, high-strain work with high demands and low control



1  
2  
3 exhausts personnel and decreases productivity. Low-strain work with high control and low demands  
4  
5 may not offer optimal challenges, and passive work with low demands and low control may lead to  
6  
7 apathy and loss of learned skills and abilities. Besides an optimal balance between job demands and  
8  
9 job control, also social support at work is likely to promote good health, learning and productivity<sup>13</sup>.  
10  
11 Social support can, for example, buffer the negative effect of psychological stressors on employee  
12  
13 health, and co-workers and supervisors are valuable sources of information and expertise.  
14  
15  
16  
17

## 18 AIM AND HYPOTHESES OF THE STUDY

19  
20 The aim of this study was to investigate associations between health care personnel's perceived job  
21  
22 strain, supervisor support and the outcome of care in terms of glycaemic control among patients  
23  
24 with type 2 diabetes. We hypothesize that glycaemic control is best achieved in health centres  
25  
26 where health care personnel has possibility to active work and high supervisor support.  
27  
28  
29  
30  
31

## 32 METHODS

### 33 Study context

34  
35 The study was conducted in 18 outpatient health centres (HC) clinics in five municipalities in  
36  
37 Finland. Municipalities differed in size (about 7500-200000 inhabitants) and the number of health  
38  
39 centres in each municipality (1-10). In Finland, municipalities are responsible for organizing  
40  
41 primary health care services and cover the costs together with the state. Primary health care services  
42  
43 are provided by a health centre comprising inpatient and outpatient units. Health centres offer a  
44  
45 wide range of care services including doctor and nurse services<sup>14</sup> and have a central role in disease  
46  
47 management for major chronic conditions like diabetes<sup>15</sup>. Three of the five research municipalities  
48  
49 had a family doctor system in their HCs and all HCs had a diabetes nurse. One city had also a clinic  
50  
51 specialized for prevention and care of chronic conditions. Patients from HCs could be referred there  
52  
53 for additional advice and care.  
54  
55  
56  
57  
58  
59  
60

### Data collection and participants

The data to this cross-sectional study were gathered in 2006. Information on job strain and supervisor support in 18 HCs is based on responses of doctors (n=122, mean age 45.5 years) and nurses (n=300, mean age 47.1 years), who took part in the Finnish Public Sector Study<sup>16</sup>, a voluntary-basis survey addressed to local government personnel of the participating towns (response rate 79%). Information on glycaemic control (HbA1c-values) of patients with the diagnosis of type 2 diabetes (N=8975, 51% men, mean age 67 years, SD 11, range 16-106 years) was collected from HC registers by the contact persons who worked in HCs. They delivered anonymous data to researchers. Aggregated variables indicating the levels of job strain and social support (based on survey responses of doctors and nurses) were created for each HC and linked to patient data. Thus, each patient has information in her/his individual data on job strain and supervisor support in the HC that had responsibility of her/his diabetes care.

The Finnish Public Sector Study was approved by the ethics committee of the Finnish Institute of Occupational Health. In one city, the anonymous collection of HbA1c-values of type 2 diabetes patients combined with data on their sex, age and the postal zip code of area of residence was accomplished as a part of this study. In four other cities, the collection of the aforementioned patient data was based on a written application approved by the chief physician of primary care or the Board of Health and Social Affairs/Board of Social Security in the respective municipality.

### Measures

#### Job strain and supervisor support

Aggregated measure of job strain was derived from the responses of doctors and nurses (n=422) to questions measuring job demands (5 items) and job control (9 items) derived from the Job Content Questionnaire<sup>17</sup>. Aggregated measure of social support from the supervisor<sup>18 19</sup> (4 items) was

1  
2  
3 derived from a standard survey instrument of Statistics Finland<sup>20</sup>. A 5-point Likert-type response  
4  
5 format ranging from 1 (totally agree) to 5 (totally disagree) was used for all items. A mean score for  
6  
7 the constructs was computed and the individual scores were then used to measure aggregated scores  
8  
9 of job strain and supervisor support for each work unit (HC) based on the identification of each  
10  
11 participant's work unit obtained from employers' administrative records.  
12  
13

14  
15  
16 To create a job strain indicator for each HC, aggregated demands and control were split on the  
17  
18 median and combined to four categories: low strain jobs (low demands combined with high control,  
19  
20 4 HCs), active jobs (high demands combined with high control, 5 HCs), passive jobs (low demands  
21  
22 combined with low control, 5 HCs), and high strain jobs (high demands combined with low control,  
23  
24 4 HCs)<sup>12</sup>. To create a supervisor support indicator for each HC, aggregated supervisor support was  
25  
26 split into three equal groups indicating low, medium and high support (6 HCs in each group).  
27  
28  
29

30  
31  
32 Job strain and supervisor support indicators for each HC were created based on the responses of  
33  
34 doctors and nurses because doctors and nurses work independently in HCs and equally affect the  
35  
36 quality of care. Aggregated job demands of doctors were higher (mean 3.9, range 3.0-4.4) than job  
37  
38 demands of nurses (mean 3.5, range 2.8-4.3). Aggregated job control of doctors was also somewhat  
39  
40 higher (mean 3.9, range 3.7-4.3) than job control of nurses (mean 3.8, range 3.6-4.2). In aggregated  
41  
42 supervisor support there was no difference between doctors (mean 3.6, range 2.5-5.0) and nurses  
43  
44 (3.6, range 2.9-4.5).  
45  
46  
47  
48

#### 49 Glycaemic control

50  
51 Glycaemic control was determined by 1 year's measurements of glycated haemoglobin (HbA1c)  
52  
53 value. In case of several control measurements the mean HbA1c-value was calculated (mean  
54  
55 number of measurements was 2.1, range 1-15). Of the patients, 35% had one measurement. Based  
56  
57  
58  
59  
60

1  
2  
3 on the standards of medical care in diabetes<sup>21</sup> we used a value under 7% to indicate good and a  
4  
5 value of 7 or higher to indicate poor glycaemic control.  
6  
7

### 8 9 **Background variables**

10  
11 *Patient characteristics:* Information on age, sex, and the postal zip code of area of residence of each  
12  
13 patient was obtained from the HC's registers.  
14

15  
16 *HC characteristics:* The proportion of temporary employees and the mean rate of sickness absence  
17  
18 days in the work unit in 2006 were drawn from employers' registers<sup>22</sup>.  
19

20  
21 *HC service area characteristics:* By using the patient postal zip codes and data obtained from  
22  
23 Statistics Finland we formulated the average educational level (percentage of adults aged >18 years  
24  
25 whose highest education level is elementary school), the median income and the unemployment rate  
26  
27 (unemployed persons belonging to the workforce divided by total workforce) of the residents in the  
28  
29 HC catchment area, that is, the population-weighted means for residents in the specific areas that  
30  
31 each HC served. The mean for each variable for each HC was calculated and linked to individual  
32  
33 data on each patient. Educational level, income and unemployment rate are standard variables to  
34  
35 characterize areal disadvantage and deprivation<sup>23 24</sup>.  
36  
37  
38  
39

### 40 41 **Statistical analysis**

42  
43 The statistical data analysis was carried out within individual patient data (N=8975) with HC  
44  
45 characteristics on an aggregated level. Descriptive statistics were estimated and the baseline  
46  
47 associations between independent variables, covariates and glycaemic control were tested with  
48  
49 Pearson chi<sup>2</sup>-tests or one-way analysis of variance depending on the measurement scale of the  
50  
51 variable of interest. Because the patients were nested within the 18 HC units, we used a two-level  
52  
53 modelling to account the data structure with job strain (or supervisor support) at the second level  
54  
55 and the outcome – patient-level glycaemic control – at the first level. We fitted five models using  
56  
57  
58  
59  
60

1  
2  
3 the multilevel logistic regression analysis. The first model, an empty model including only the  
4 random effect variable, was used to examine the clustering of the outcome between the 18 HCs.  
5  
6  
7 Then, we added job strain (or supervisor support) to examine its associations with the outcome.  
8  
9  
10 Next, we added patient-level confounders, after that HC characteristics and finally, variables  
11 describing socioeconomic composition of the HC service area (unadjusted model, model I, II and  
12 III). Because we used register data combined with aggregated variables describing HCs and HC  
13 catchment areas, there were only a few missing cases, and they were not included in the analyses.  
14  
15  
16 Statistical analyses were performed using SPSS version 19.0 and R-program, version 2.13.0.  
17  
18  
19  
20  
21  
22

## 23 RESULTS

24  
25 The baseline associations between independent variables, covariates and glycaemic control  
26 are presented in tables 1-2. The mean HbA1c level of patients was 7.1 (SD 1.2, range 4.5-  
27 19.1, Q1=6.3, median 6.8, Q3=7.6), and 43% had poor glycaemic control ( $\geq 7\%$ ). HCs did not  
28 differ in the mean HbA1c-levels but the percentage of poor glycaemic control was highest in  
29 high strain HCs. The mean rates of job control, job demands and supervisor support in the  
30 HCs were 3.9, 3.6 and 3.6, respectively.  
31  
32  
33  
34  
35  
36  
37  
38  
39

40 The socioeconomic characteristics of the HC service areas were as follows: residents with  
41 more than basic education in the patients' neighbourhood 73%, the median yearly income  
42 17203 euros, and the mean unemployment rate 7%. (Table 1)  
43  
44  
45  
46  
47  
48

49 Table 1 shows that the percentage of temporary employees in HCs was 22% being lowest in  
50 passive job HCs (12%) and highest in active job HCs (30%). The average number of sickness  
51 absence days was 14 days. It was lowest in low strain job HCs (9 days) and highest in passive  
52  
53  
54  
55  
56  
57  
58  
59  
60

1  
2  
3 job HCs (17 days). The socioeconomic composition of residents was most favourable in  
4  
5 active job HC service areas. (Table 1)  
6  
7  
8

9  
10 Table 2 shows that the percentage of temporary employees was highest in the moderate  
11  
12 supervisor support HCs (31%). The average number of sickness absence days was lowest in  
13  
14 high supervisor support HCs (10 days). Also the socioeconomic composition of residents was  
15  
16 more favourable than the average in the high support HC service areas as well as in the  
17  
18 moderate supervisor support HC areas.  
19

20 [Insert tables 1-2 somewhere here]  
21  
22  
23  
24

25 Table 3 shows that after adjustment for all covariates (model III) glycaemic control among  
26  
27 patients was less optimal in HCs where care personnel's perceived job strain was high  
28  
29 compared with HCs where job strain was low. Active and passive work HCs did not differ  
30  
31 statistically significantly from low strain HCs in the outcome of care. Also, supervisor support  
32  
33 was not associated with patients' glycaemic control (table 4).  
34

35 [Insert tables 3-4 somewhere here]  
36  
37  
38  
39

## 40 **DISCUSSION**

41  
42 This study showed that exposure to high job strain of primary health care personnel may be  
43  
44 associated with worse outcome of diabetes care. Glycaemic control among type 2 diabetes  
45  
46 patients was less optimal in high strain HCs than in low strain HCs. Supervisor support was  
47  
48 not associated with the outcome of care.  
49  
50

51  
52  
53 Several studies have found the strong association between experienced work load and  
54  
55 burnout, particularly its exhaustion dimension<sup>25 26 27</sup>. Emotional exhaustion is further  
56  
57  
58  
59  
60

1  
2  
3 associated with low job performance shown in job withdrawal, deterioration of productivity  
4 and effectiveness<sup>27</sup>, and the outcome of care<sup>5 28</sup>. Recent studies on physicians show that their  
5  
6  
7 experienced job strain, stress and burnout are associated with increased risk of suboptimal  
8  
9 patient care and likelihood of making errors<sup>29-32</sup>. Exhausted employees are not effective,  
10  
11 accurate or innovative at work<sup>13</sup>. Instead, a favourable psychosocial work environment may  
12  
13 enhance employee well-being and motivate health care personnel to invent new working  
14  
15 methods and strengthen patients' motivation to self-care.  
16  
17  
18  
19

20  
21 However, patients' glycaemic control was not best in active jobs HCs as we predicted based  
22  
23 on the job strain model<sup>13</sup>. This result is in line with the results of the study on clinicians in  
24  
25 surgery by Klein et al.<sup>30</sup> They found that clinicians with active job reported suboptimal quality  
26  
27 of care more often than clinicians with low-strain job. It is possible that active work  
28  
29 assumption does not fit well in the health care sector. Active jobs give more challenges than  
30  
31 low strain jobs or passive jobs but the motivational potential of higher demands of active jobs  
32  
33 may be lost if demands are so high that they overwhelm health care personnel's capacities. In  
34  
35 that case high control or other job resources may have only limited capability of buffering the  
36  
37 undesired impact of high job demands<sup>25 33</sup>. Contrary to our prediction, social support from  
38  
39 supervisor was not associated with the outcome of care. The fact that doctors and nurses in the  
40  
41 Finnish HCs work quite independently is a potential explanation for this.  
42  
43  
44  
45  
46

47 Register data give reliable care results but also has limitations. It does not give information on  
48  
49 patients' socioeconomic status, such as educational level that is known to be strongly related  
50  
51 with health behaviour, many unhealthy behaviours like smoking, poor dietary habits and  
52  
53 physical inactivity being more prevalent in lower socioeconomic groups<sup>34</sup>. Healthy lifestyle  
54  
55 again is the key factor in management of diabetes<sup>21</sup>. However, we were able to use  
56  
57  
58  
59  
60

1  
2  
3 disadvantage of the patient's residential area as a proxy for individual socioeconomic  
4  
5 position. Indeed, the effect of job strain on glycaemic control emerged after adjustment of  
6  
7 educational level, income and unemployment rate in the HC catchment area. This result points  
8  
9 to suppression, a situation in which the magnitude of the relationship between an independent  
10  
11 variable and a dependent variable becomes larger when a third variable (or multiple variables)  
12  
13 is included to the analysis<sup>35</sup>  
14  
15

16  
17  
18 This was a cross-sectional study and no causal inferences of the associations between  
19  
20 independent and dependent variables can be made. Another limitation was that we did not  
21  
22 have information on patients' medication and comorbidity associated with type 2 diabetes<sup>36</sup>.  
23  
24 Neither did we have information on other aspects of the quality of care, such as numbers of  
25  
26 doctors or nurses per inhabitants in the HC service area indicating the sufficiency of staff.  
27  
28 This is an important question to be further studied. However, job strain can be seen as one  
29  
30 indicator of sufficiency of staff.  
31  
32  
33

34  
35  
36 Further, we did not have access to exact information on where the principal care responsibility  
37  
38 of the patients was. In spite of the fact that the patients had HbA1c-values measured via the  
39  
40 HC it is possible that some of them, at least the younger ones, had also visited separate private  
41  
42 or specialized public occupational health care units. In these cases, the psychosocial work  
43  
44 environment of these units is more crucial for the outcome of care. However, the majority of  
45  
46 the patients in the data were over 64 years old with many visits to the HC during 2006. Thus,  
47  
48 it is unlikely that their main care responsibility would have been somewhere else. Also, the  
49  
50 municipalities now studied, did not systematically differ in availability of care from  
51  
52 occupational health care units.  
53  
54  
55



1  
2  
3 This and previous studies suggest that the organization of care affects the quality and the  
4  
5 outcome of care<sup>5 11 30</sup>. However, research evidence is still limited. Follow-up studies  
6  
7 investigating the effect of changes in the psychosocial work environment of health care  
8  
9 personnel on change in glycaemic control of patients with type 2 diabetes, are needed as well  
10  
11 as interventions aiming at improving psychosocial work environment in health care. The  
12  
13 studies of Bourbonnais et al.<sup>37 38</sup> showed that such interventions may have positive effect on  
14  
15 the psychosocial work environment and mental health of health care personnel. Monitoring  
16  
17 HbA1c-values might be a useful tool in strategic leaderships of HCs because maintaining  
18  
19 good control is essential in order to prevent micro- and macrovascular complications of  
20  
21 diabetes and costs caused by these chronic diseases related to type 2 diabetes<sup>1</sup>.  
22  
23  
24  
25  
26

### 27 **Funding statement**

28  
29 The work was supported by the Academy of Finland (The Finnish public sector study, projects  
30  
31 1129262, 129262) and the participating organizations.  
32  
33  
34

### 35 **Competing Interest**

36  
37 None to declare  
38  
39  
40

### 41 **Contributorship statement**

42  
43 Anne Koponen, the guarantor, formulated the initial hypotheses, designed the study, analyzed and  
44  
45 interpreted data, and wrote the manuscript. Jussi Vahtera, Sakari Suominen, Marianna Virtanen and  
46  
47 Mika Kivimäki formulated the initial hypotheses, designed the study, contributed to interpretation  
48  
49 of the data, and reviewed/edited the manuscript. Nina Simonsen-Rehn designed the study,  
50  
51 contributed to interpretation of the data, and reviewed/edited the manuscript. Jaana Pentti designed  
52  
53 the study, analyzed data, contributed to interpretation of the data, and reviewed/edited the  
54  
55  
56  
57  
58  
59  
60

1  
2  
3  
4  
5  
6  
7  
8  
9  
10  
11  
12  
13  
14  
15  
16  
17  
18  
19  
20  
21  
22  
23  
24  
25  
26  
27  
28  
29  
30  
31  
32  
33  
34  
35  
36  
37  
38  
39  
40  
41  
42  
43  
44  
45  
46  
47  
48  
49  
50  
51  
52  
53  
54  
55  
56  
57  
58  
59  
60

manuscript. Janne Pitkaniemi analyzed data, contributed to interpretation of the data, and reviewed/edited the manuscript.

For peer review only

## References:

- 1 Fowler MJ. Microvascular and macrovascular complications of diabetes. *Clin Diab* 2008;**26**:77-82.
- 2 Al Khaja KAJ, Sequeira RP, Damanhori AHH. Comparison of the quality of diabetes care in primary care diabetic clinics and general practice clinics. *Diab Res Clin Pract* 2005;**70**:174-82.
- 3 Mathers CD, Loncar D. Projections of global mortality and burden of disease from 2002 to 2030. *PLoS Med* 2006;**3**:e442. doi:10.1371/journal.pmed.0030442
- 4 Koski S. Diabetesbarometri 2010. [Diabetes Barometer]. Suomen Diabetesliitto ry. Kehitys Oy 2011.
- 5 Aiken LH, Clarke SP, Sloane DM. Hospital staffing, organization, and quality of care: Cross-national findings. *Nurs Outlook* 2002a;**50**:187-94.
- 6 Collins MM, O'Sullivan T, Harkins V, Perry IJ. Quality of life and quality of care in patients with diabetes experiencing different models of care. *Diab Care* 2009;**32**:603-5.
- 7 McLean G, Guthrie B, Sutton M. Differences in the quality of primary medical care services by remoteness from urban settlements. *Qual Saf Health Care* 2007;**16**:446-9.
- 8 Litaker D, Mion LC, Planavsky L, et al. Physician – nurse practitioner teams in chronic disease management: the impact on costs, clinical effectiveness, and patients' perception of care. *J Interprof Care* 2003;**17**:223-37.
- 9 Taylor CB, Miller NH, Reilly KR, et al. Evaluation of a nurse-care management system to improve outcomes in patients with complicated diabetes. *Diab Care* 2003;**26**:1058-63.
- 10 Linzer M, Baier Manwell L, Williams ES, et al. Working conditions in primary care: physician reactions and care quality. *Ann Intern Med* 2009;**151**:28-36.

- 1  
2  
3 11 Virtanen M, Oksanen T, Kawachi I, et al. Organizational justice in primary care health  
4 center and glycemic control among patients. *Med Care* 2012;**50**:831-5.  
5  
6  
7 12 Karasek RA. Job demands, job decision latitude, and mental strain: Implications for job  
8 redesign. *Adm Sci Q* 1979;**24**:285-308.  
9  
10  
11 13 Karasek RA, Theorell T. Healthy work. Stress, productivity, and the reconstruction of  
12 working life. New York: Basic Books 1990.  
13  
14  
15 14 Laamanen R, Simonsen-Rehn N, Suominen S, et al. Outsourcing primary health care  
16 services – How politicians explain the grounds for their decisions. *Health Policy* 2008;**88**:294-  
17 307.  
18  
19  
20  
21  
22 15 Teperi J, Porter ME, Vuorenkoski L, Baron JF. The Finnish health care system: a value-  
23 based perspective. *Sitra Reports* 2009;**82**. Helsinki: Sitra.  
24  
25  
26  
27 16 Kivimäki M, Lawlor DA, Davey Smith G, Kouvonen A, Virtanen M, Elovainio M,  
28 Vahtera J. Socioeconomic position, co-occurrence of behaviour-related risk factors, and  
29 coronary heart disease: The Finnish Public Sector Study. *Am J Public Health* 2007; **97**:874-  
30 979.  
31  
32  
33  
34  
35  
36 17 Karasek RA. Job Content Questionnaire and User's Guide. Revision 1.1. Los Angeles:  
37 Department of Industrial and Systems Engineering. University of Southern Los Angeles 1985.  
38  
39  
40 18 Vahtera J, Kivimäki M, Pentti J, Theorell T. Effect of change in the psychosocial work  
41 environment on sickness absence: a 7-year follow-up of initially healthy employees. *JECH*  
42 2000;**54**:484-93.  
43  
44  
45  
46  
47 19 Kivimäki M, Vahtera J, Pentti J, Ferrie J. Factors underlying the effect of organisational  
48 downsizing on health of employees: longitudinal cohort study. *BMJ* 2000; **320**: 971-975.  
49  
50  
51  
52 20 Lehto A-M. Quality of working life and equity. Helsinki, Finland: Statistics Finland 1991.  
53  
54  
55 21 American Diabetes Association. Standards of medical care in diabetes - 2011. *Diab Care*  
56 2011;**34**(Suppl 1):P11-61.  
57  
58  
59  
60

1  
2  
3 22 Virtanen M, Kivimäki M, Pentti J, et al. School neighborhood disadvantage as a predictor  
4 of long-term sick leave among teachers: Prospective cohort study. *Am J Epidemiol*  
5 2010;**171**:785-92.  
6  
7

8  
9  
10 23 Kim D, Masyn KE, Kawachi I, et al. Neighborhood socioeconomic status and behavioral  
11 pathways to risks of colon and rectal cancer in women. *Cancer* 2010;**116**:4187-96.  
12

13  
14 24 Diez Roux AV, Merkin SS, Arnett D, et al. Neighborhood of residence and incidence of  
15 coronary heart disease. *New Engl J Med* 2001;**345**:99-106.  
16

17  
18 25 Bakker AB, Demerouti E, Verbeke, W. Using the job demands-resources model to predict  
19 burnout and performance. *HRM* 2004;**43**:83-104.  
20

21  
22 26 Koponen AM, Laamanen R, Simonsen-Rehn N, et al. Psychosocial work environment and  
23 emotional exhaustion – Does a service provision model play a role? *Health Policy*,  
24 2010;**94**:111-19.  
25  
26  
27

28  
29 27 Maslach C, Schaufeli WB, Leiter MP. Job burnout. *Annu Rev Psychol* 2001;**52**:397-422.  
30

31  
32 28 Aiken LH, Clarke SP, Sloane DM, et al. Hospital nurse staffing and patient mortality,  
33 nurse burnout, and job dissatisfaction. *JAMA* 2002b;**288**:1987-93.  
34

35  
36 29 Klein J, Grosse Frie K, Blum K, et al. Burnout and perceived quality of care among  
37 German clinicians in surgery. *IJQHC* 2010;**22**:525-30.  
38

39  
40 30 Klein J, Grosse Frie K, Blum K, et al. Psychosocial stress at work and perceived quality of  
41 care among clinicians in surgery. *BMC Health Services Research* 2011;**11**:109.  
42  
43

44  
45 31 Wallace JE, Lemaire JB, Ghali WA. Physician wellness: a missing quality indicator.  
46  
47 *Lancet* 2009;**374**:1714-21.  
48

49  
50 32 Williams ES, Manwell LB, Konrad TR, et al. The relationship of organizational culture,  
51 stress, satisfaction, and burnout with physician-reported error and suboptimal patient care:  
52 Results from the MEMO study. *Health Care Manage Rev* 2007;**32**:203-212.  
53  
54  
55

1  
2  
3 33 Koponen A, Laamanen R, Simonsen-Rehn N, Suominen S. Perusterveydenhuollon ja  
4 sosiaalitoimen henkilöstön työolot ja työuupumus neljässä kunnassa – Onko  
5 palvelutuotantomallilla väliä? [Psychosocial work environment and emotional exhaustion of  
6 primary health care and social sector personnel in four municipalities – Does a service  
7 provision model play a role?]. *Sosiaalilääketieteellinen aikakauslehti* 2007;**3**:163-75.

8  
9  
10  
11  
12  
13  
14 34 Laaksonen M, Talala K, Martelin T, et al. Health behaviours as explanations for  
15 educational level differences in cardiovascular and all-cause mortality: a follow-up of 60000  
16 men and women over 23 years. *EJPH* 2008;**18**:38-43.

17  
18  
19  
20  
21 35 MacKinnon DP, Krull JL, Lockwood CM. Equivalence of the mediation, confounding and  
22 suppression effect. *Prev Sci* 2000;**1**:173.

23  
24  
25  
26 36 Unwin N, Whiting D, Roglic G. Social determinants of diabetes and challenges of  
27 prevention. *The Lancet* 2010;**375**:2204-5.

28  
29  
30 37 Bourbonnais R, Brisson C, Vinet A, et al. Effectiveness of a participative intervention on  
31 psychosocial work factors to prevent mental health problems in a hospital setting. *Occup*  
32  
33  
34  
35  
36  
37  
38  
39  
40  
41  
42  
43  
44  
45  
46  
47  
48  
49  
50  
51  
52  
53  
54  
55  
56  
57  
58  
59  
60

Environ Med 2006;**63**:335-42.

38 Bourbonnais R, Brisson C, Vézina M. Long-term effects of an intervention on  
psychosocial work factors among healthcare professionals in a hospital setting. *Occup*  
Environ Med 2011;**68**:479-86.

Table 1. Patient, health centre, and health centre service area characteristics in primary care health centres (HCs) varying in job strain.

| Job strain in primary care health centre                                           |                   |                                             |                                          |                                         |                                              |         |
|------------------------------------------------------------------------------------|-------------------|---------------------------------------------|------------------------------------------|-----------------------------------------|----------------------------------------------|---------|
|                                                                                    | All HCs<br>(N=18) | Low strain<br>job HCs <sup>3</sup><br>(n=4) | Passive<br>job HCs <sup>4</sup><br>(n=5) | Active<br>job HCs <sup>5</sup><br>(n=5) | High strain<br>job HCs <sup>6</sup><br>(n=4) | p-value |
| <i>Patient characteristics</i>                                                     |                   |                                             |                                          |                                         |                                              |         |
| Percentage of men <sup>1</sup>                                                     | 51                | 50                                          | 48                                       | 54                                      | 52                                           | <.001   |
| Age (mean/SD) <sup>2</sup>                                                         | 67 (11.6)         | 67 (10.9)                                   | 68 (11.2)                                | 66 (11.2)                               | 65 (11.2)                                    | <.001   |
| HbA1c<br>(mean/SD) <sup>2</sup>                                                    | 7.1 (1.2)         | 7.1 (1.2)                                   | 7.1 (1.1)                                | 7.1 (1.1)                               | 7.1 (1.1)                                    | ns.     |
| Patients with poor<br>glycaemic control<br>(HbA1c≥7%) (%) <sup>1</sup>             | 43                | 45                                          | 42                                       | 42                                      | 46                                           | <.05    |
| N                                                                                  | 8975              | 1999                                        | 2862                                     | 2707                                    | 1407                                         |         |
| <i>HC characteristics</i>                                                          |                   |                                             |                                          |                                         |                                              |         |
| Temporary employees<br>(%) <sup>1</sup>                                            | 22                | 28                                          | 12                                       | 30                                      | 16                                           | <.001   |
| Staff sickness absence<br>days (mean/SD) <sup>2</sup>                              | 14 (5.3)          | 9 (4.3)                                     | 17 (2.3)                                 | 12 (5.4)                                | 16 (5.5)                                     | <.001   |
| <i>Socioeconomic<br/>composition of HC<br/>service area</i>                        |                   |                                             |                                          |                                         |                                              |         |
| Percentage of the lowest<br>educational level <sup>1</sup>                         | 27                | 29                                          | 26                                       | 25                                      | 27                                           | <.001   |
| Median income level in<br>the HC service area,<br>euros<br>(mean, SD) <sup>2</sup> | 17203<br>(2556)   | 15660<br>(3057)                             | 16097<br>(756)                           | 18951<br>(2166)                         | 18280<br>(2301)                              | <.001   |
| Unemployment rate<br>(mean, SD) <sup>2</sup>                                       | 7<br>(2.9)        | 7<br>(3.3)                                  | 10<br>(1.6)                              | 4<br>(0.8)                              | 6<br>(1.2)                                   | <.001   |

1)  $\chi^2$ -test

2) 1-way ANOVA

3) Low demands and high control

4) Low demands and low control

5) High demands and high control

6) High demands and low control

Table 2. Patient, health centre, and health centre service area characteristics in primary care health centres (HCs) varying in supervisor support.

| Supervisor support in primary care health centre                              |                   |                             |                                  |                              |         |
|-------------------------------------------------------------------------------|-------------------|-----------------------------|----------------------------------|------------------------------|---------|
|                                                                               | All HCs<br>(N=18) | Low support<br>HCs<br>(n=6) | Moderate<br>support HCs<br>(n=6) | High<br>support HCs<br>(n=6) | p-value |
| <i>Patient characteristics</i>                                                |                   |                             |                                  |                              |         |
| Percentage of men <sup>1</sup>                                                | 51                | 48                          | 54                               | 52                           | <.001   |
| Age (mean/SD) <sup>2</sup>                                                    | 67 (11.2)         | 67 (11.3)                   | 66 (11.0)                        | 65 (11.6)                    | <.001   |
| HbA1c-value<br>(mean/SD) <sup>2</sup>                                         | 7.1 (1.2)         | 7.1 (1.3)                   | 7.1 (1.1)                        | 7.0 (1.1)                    | ns.     |
| Patients with poor<br>glycaemic control<br>(HbA1c $\geq$ 7%) (%) <sup>1</sup> | 43                | 44                          | 44                               | 41                           | ns.     |
| N                                                                             | 8975              | 3911                        | 3194                             | 1870                         |         |
| <i>HC characteristics</i>                                                     |                   |                             |                                  |                              |         |
| Temporary employees<br>(%) <sup>1</sup>                                       | 22                | 12                          | 31                               | 26                           | <.001   |
| Staff sickness absence<br>days (mean/SD) <sup>2</sup>                         | 14 (5.3)          | 15 (4.4)                    | 14 (4.5)                         | 10 (6.6)                     | <.001   |
| <i>Socioeconomic<br/>composition of HC<br/>service area</i>                   |                   |                             |                                  |                              |         |
| Percentage of the lowest<br>educational level <sup>1</sup>                    | 27                | 28                          | 26                               | 25                           | <.001   |
| Median income level,<br>euros (mean, SD) <sup>2</sup>                         | 17203<br>(2556)   | 15173<br>(1510)             | 18971<br>(2009)                  | 18429<br>(2055)              | <.001   |
| Unemployment rate<br>(mean/SD) <sup>2</sup>                                   | 7<br>(2.9)        | 10<br>(1.4)                 | 5<br>(1.4)                       | 5<br>(0.6)                   | <.01    |

1)  $\chi^2$ -test

2) 1-way ANOVA



Table 3. Level of perceived job strain among the health care personnel (doctors and nurses) as a predictor of poor glycaemic control indicator (HbA1c $\geq$ 7%) in patients with type 2 diabetes (N=8975) in primary care health centres (HCs, N=18).

| Job strain in the HC  | Unadjusted model    |         | Model I*            |         | Model II**          |         | Model III***        |         |
|-----------------------|---------------------|---------|---------------------|---------|---------------------|---------|---------------------|---------|
|                       | OR (95% CI)         | p-value |
| <i>Fixed effects</i>  |                     |         |                     |         |                     |         |                     |         |
| Low strain job        | 1.00                |         | 1.00                |         | 1.00                |         | 1.00                |         |
| Passive job           | 0.96<br>(0.72-1.27) | ns.     | 0.96<br>(0.72-1.27) | ns.     | 0.97<br>(0.70-1.36) | ns.     | 1.08<br>(0.86-1.36) | ns.     |
| Active job            | 0.89<br>(0.68-1.18) | ns.     | 0.89<br>(0.67-1.19) | ns.     | 0.91<br>(0.69-1.20) | ns.     | 1.17<br>(0.96-1.43) | ns.     |
| High strain job       | 1.08<br>(0.80-1.47) | ns.     | 1.09<br>(0.80-1.48) | ns.     | 1.10<br>(0.78-1.56) | ns.     | 1.44<br>(1.12-1.86) | <.01    |
| <i>Random effects</i> |                     |         |                     |         |                     |         |                     |         |
| HC variance (SE)      | 0.04<br>0.05        |         | 0.04<br>0.05        |         | 0.04<br>0.04        |         | 0.01<br>0.02        |         |

Multilevel regression analysis

\*Adjusted for patient characteristics (sex and age)

\*\*Adjusted as model I + HC characteristics (the percentage of temporary employees and the mean rate of sickness absence days in the HC)

\*\*\* Adjusted as model II + HC service area characteristics (educational level of the residents, median income and unemployment rate)

Table 4. Level of perceived supervisor support among the health care personnel (doctors and nurses) as a predictor of poor glycaemic control indicator (HbA1c $\geq$ 7%) in patients with type 2 diabetes (N=8975) in primary care health centres (HCs, N=18).

| Supervisor support in the HCs | Unadjusted model |         | Model I*         |         | Model II**       |         | Model III***     |         |
|-------------------------------|------------------|---------|------------------|---------|------------------|---------|------------------|---------|
|                               | OR (95% CI)      | p-value |
| <i>Fixed effects</i>          |                  |         |                  |         |                  |         |                  |         |
| <b>High support</b>           | 1.00             |         | 1.00             |         | 1.00             |         | 1.00             |         |
| <b>Medium support</b>         | 1.11 (0.86-1.43) | ns.     | 1.11 (0.86-1.43) | ns.     | 1.17 (0.90-1.53) | ns.     | 1.14 (0.95-1.36) | ns.     |
| <b>Low support</b>            | 1.13 (0.88-1.45) | ns.     | 1.13 (0.88-1.45) | ns.     | 1.10 (0.84-1.44) | ns.     | 0.87 (0.65-1.16) | ns.     |
| <i>Random effects</i>         |                  |         |                  |         |                  |         |                  |         |
| <b>HC variance</b>            | 0.04             |         | 0.04             |         | 0.03             |         | 0.01             |         |
| <b>(SE)</b>                   | 0.05             |         | 0.05             |         | 0.04             |         | 0.02             |         |

Multilevel regression analysis

\*Adjusted for patient characteristics (sex and age)

\*\*Adjusted as model I + HC characteristics (the percentage of temporary employees and the mean rate of sickness absence days in the HC)

\*\*\* Adjusted as model II + HC service area characteristics (educational level of the residents, median income and unemployment rate)

1  
2  
3 **Job strain and supervisor support in primary care health centres and**  
4 **glycaemic control among patients with type 2 diabetes – a cross-sectional**  
5 **study**  
6  
7  
8  
9

10  
11  
12  
13 **Abstract**

14  
15  
16 **Objectives** This study investigates associations between health care personnel's perceived job  
17 strain, supervisor support and the outcome of care in terms of glycaemic control among patients  
18 with type 2 diabetes.  
19  
20

21  
22 **Design** A cross-sectional study in 2006.  
23

24  
25 **Setting** Eighteen primary care health centres (HCs) from five municipalities in Finland.  
26

27  
28 **Participants** Aggregated survey data on perceived job strain and supervisor support from health  
29 care personnel (doctors, n=122, mean age 45.5 years, nurses, n=300, mean age 47.1 years) was  
30 combined with registered data from 8975 patients (51% men, mean age 67 years) with type 2  
31 diabetes.  
32  
33  
34

35  
36 **Outcome measure** Poor glycaemic control (HbA1c  $\geq 7\%$ ).  
37

38  
39 **Results** The mean HbA1c-level among the patients with type 2 diabetes was 7.1 (SD 1.2, range 4.5-  
40 19.1), and 43% had poor glycaemic control (HbA1c  $\geq 7\%$ ). Multilevel logistic regression analyses  
41 adjusted for patient's age and sex, and HC- and HC service area-level characteristics showed that  
42 patients' HbA1c-levels were less optimal in high strain HCs than in low strain HCs (OR 1.44, 95%,  
43 CI 1.12-1.86). Supervisor support in HCs was not associated with the outcome of care.  
44  
45  
46  
47

48  
49 **Conclusion** The level of job strain among the health care personnel may play a role in achieving  
50 good glycaemic control among patients with type 2 diabetes.  
51  
52  
53  
54  
55  
56  
57  
58  
59  
60

## ARTICLE SUMMARY

### Article focus

- This paper focuses on the association between job strain and **supervisor support** of health care personnel and the outcome of care among patients with type 2 diabetes.

### Key messages

- HbA1c-levels were less optimal in health centres where health care personnel's perceived job strain was high compared with health centres where perceived job strain was low.
- **Perceived job strain of health care personnel and health centres' success in achieving glycaemic control of patients with diabetes might be good quality indicators of patient care.**

### Strengths and limitations of this study

- Previous studies suggest that the organization of care can affect the quality and the outcome of care in diabetes. This study showed that job strain of health care personnel may be one key factor associated with glycaemic control among patients with type 2 diabetes.
- We did not have information on patients' medication and comorbidity associated with type 2 diabetes.

## INTRODUCTION

Diabetes mellitus is an important and increasing public health problem worldwide<sup>1 2 3</sup>. In Finland, about 10% of the population has diabetes of which a majority is of type 2<sup>4</sup>. Primary health care faces a serious challenge to provide high quality care in order to decrease complications, mortality and costs caused by this public health burden.

Health care organizations may differ in the quality of care<sup>5</sup>. However, we know only little about organizational aspects that promote good care of diabetes. One aspect may relate to the organization of care. Collins et al.<sup>6</sup> showed that compliance to diabetes care was better in structured general practitioner (GP) care than in traditional hospital care or in hospital/GP shared care. McLean et al.<sup>7</sup> found that the intermediate outcome target in cholesterol measurement of diabetic patients was achieved more often in urban practices than in very remote rural practices. Medical outcomes of care in type 2 diabetes have been shown to be better in physician-nurse practitioner teams than in care provided by a physician alone<sup>8 9</sup>. Linzer et al.<sup>10</sup> found that good organizational culture with high values alignment with leadership and work control was associated with higher-quality care for diabetic patients. In the study by Virtanen et al.<sup>11</sup> perception of procedural justice among staff was associated with more optimal glycaemic control among patients.

More research on the associations between organizational factors and the quality of care, especially the outcome of care, in diabetes is needed. Based on the theory of Karasek<sup>12</sup> and Karasek & Theorell<sup>13</sup> equilibrium between personnel's job demands and job control as well as social support at work might be important organizational factors associated with the quality of care. Active work with high demands and high control most likely promotes high quality care<sup>13</sup>. High demands give challenges, motivation and promote learning but combined with high control high demands do not cause negative psychological strain. Instead, high-strain work with high demands and low control

1  
2  
3 exhausts personnel and decreases productivity. Low-strain work with high control and low demands  
4  
5 may not offer optimal challenges, and passive work with low demands and low control may lead to  
6  
7 apathy and loss of learned skills and abilities. Besides an optimal balance between job demands and  
8  
9 job control, also social support at work is likely to promote good health, learning and productivity<sup>13</sup>.  
10  
11 Social support can, for example, buffer the negative effect of psychological stressors on employee  
12  
13 health, and co-workers and supervisors are valuable sources of information and expertise.  
14  
15

## 16 17 18 **AIM AND HYPOTHESES OF THE STUDY**

19  
20 **The aim of this study was to investigate** associations between health care personnel's perceived job  
21  
22 strain, **supervisor support** and the outcome of care in terms of glycaemic control among patients  
23  
24 with type 2 diabetes. We hypothesize that glycaemic control is best **achieved** in health centres  
25  
26 where health care personnel has possibility to active work and high supervisor support.  
27  
28  
29  
30  
31

## 32 **METHODS**

### 33 **Study context**

34  
35 The study was conducted in 18 outpatient health centres (HC) clinics in five municipalities in  
36  
37 Finland. Municipalities differed in size (about 7500-200000 inhabitants) and the number of health  
38  
39 centres in each municipality (1-10). In Finland, municipalities are responsible for organizing  
40  
41 primary health care services and cover the costs together with the state. Primary health care services  
42  
43 are provided by a health centre comprising inpatient and outpatient units. Health centres offer a  
44  
45 wide range of care services including doctor and nurse services<sup>14</sup> and have a central role in disease  
46  
47 management for major chronic conditions like diabetes<sup>15</sup>. **Three of the five research municipalities**  
48  
49 **had a family doctor system in their HCs and all HCs had a diabetes nurse. One city had also a clinic**  
50  
51 **specialized for prevention and care of chronic conditions. Patients from HCs could be referred there**  
52  
53 **for additional advice and care.**  
54  
55  
56  
57  
58  
59  
60

### Data collection and participants

The data to this cross-sectional study were gathered in 2006. Information on job strain and supervisor support in 18 HCs is based on responses of doctors (n=122, mean age 45.5 years) and nurses (n=300, mean age 47.1 years), who took part in the Finnish Public Sector Study<sup>16</sup>, a voluntary-basis survey addressed to local government personnel of the participating towns (response rate 79%). Information on glycaemic control (HbA1c-values) of patients with the diagnosis of type 2 diabetes (N=8975, 51% men, mean age 67 years, SD 11, range 16-106 years) was collected from HC registers by the contact persons who worked in HCs. They delivered anonymous data to researchers. Aggregated variables indicating the levels of job strain and social support (based on survey responses of doctors and nurses) were created for each HC and linked to patient data. Thus, each patient has information in her/his individual data on job strain and supervisor support in the HC that had responsibility of her/his diabetes care.

The Finnish Public Sector Study was approved by the ethics committee of the Finnish Institute of Occupational Health. In one city, the anonymous collection of HbA1c-values of type 2 diabetes patients combined with data on their sex, age and the postal zip code of area of residence was accomplished as a part of this study. In four other cities, the collection of the aforementioned patient data was based on a written application approved by the chief physician of primary care or the Board of Health and Social Affairs/Board of Social Security in the respective municipality.

### Measures

#### Job strain and supervisor support

Aggregated measure of job strain was derived from the responses of doctors and nurses (n=422) to questions measuring job demands (5 items) and job control (9 items) derived from the Job Content Questionnaire<sup>17</sup>. Aggregated measure of social support from the supervisor<sup>18 19</sup> (4 items) was

1  
2  
3 derived from a standard survey instrument of Statistics Finland<sup>20</sup>. A 5-point Likert-type response  
4  
5 format ranging from 1 (totally agree) to 5 (totally disagree) was used for all items. A mean score for  
6  
7 the constructs was computed and the individual scores were then used to measure aggregated scores  
8  
9 of job strain and supervisor support for each work unit (HC) based on the identification of each  
10  
11 participant's work unit obtained from employers' administrative records.  
12

13  
14  
15  
16 To create a job strain indicator for each HC, aggregated demands and control were split on the  
17  
18 median and combined to four categories: low strain jobs (low demands combined with high control,  
19  
20 4 HCs), active jobs (high demands combined with high control, 5 HCs), passive jobs (low demands  
21  
22 combined with low control, 5 HCs), and high strain jobs (high demands combined with low control,  
23  
24 4 HCs)<sup>12</sup>. To create a supervisor support indicator for each HC, aggregated supervisor support was  
25  
26 split into three equal groups indicating low, medium and high support (6 HCs in each group).  
27  
28  
29

30  
31  
32 Job strain and supervisor support indicators for each HC were created based on the responses of  
33  
34 doctors and nurses because doctors and nurses work independently in HCs and equally affect the  
35  
36 quality of care. Aggregated job demands of doctors were higher (mean 3.9, range 3.0-4.4) than job  
37  
38 demands of nurses (mean 3.5, range 2.8-4.3). Aggregated job control of doctors was also somewhat  
39  
40 higher (mean 3.9, range 3.7-4.3) than job control of nurses (mean 3.8, range 3.6-4.2). In aggregated  
41  
42 supervisor support there was no difference between doctors (mean 3.6, range 2.5-5.0) and nurses  
43  
44 (3.6, range 2.9-4.5).  
45  
46  
47  
48

#### 49 Glycaemic control

50  
51 Glycaemic control was determined by 1 year's measurements of glycated haemoglobin (HbA1c)  
52  
53 value. In case of several control measurements the mean HbA1c-value was calculated (mean  
54  
55 number of measurements was 2.1, range 1-15). Of the patients, 35% had one measurement. Based  
56  
57  
58  
59  
60



1  
2  
3 on the standards of medical care in diabetes<sup>21</sup> we used a value under 7% to indicate good and a  
4  
5 value of 7 or higher to indicate poor glycaemic control.  
6  
7

### 8 9 **Background variables**

10  
11 *Patient characteristics:* Information on age, sex, and the postal zip code of area of residence of each  
12  
13 patient was obtained from the HC's registers.  
14

15  
16 *HC characteristics:* The proportion of temporary employees and the mean rate of sickness absence  
17  
18 days in the work unit in 2006 were drawn from employers' registers<sup>22</sup>.  
19

20  
21 *HC service area characteristics:* By using the patient postal zip codes and data obtained from  
22  
23 Statistics Finland we formulated the average educational level (percentage of adults aged >18 years  
24  
25 whose highest education level is elementary school), the median income and the unemployment rate  
26  
27 (unemployed persons belonging to the workforce divided by total workforce) of the residents in the  
28  
29 HC catchment area, that is, the population-weighted means for residents in the specific areas that  
30  
31 each HC served. The mean for each variable for each HC was calculated and linked to individual  
32  
33 data on each patient. Educational level, income and unemployment rate are standard variables to  
34  
35 characterize areal disadvantage and deprivation<sup>23 24</sup>.  
36  
37  
38  
39

### 40 41 **Statistical analysis**

42  
43 The statistical data analysis was carried out within individual patient data (N=8975) with HC  
44  
45 characteristics on an aggregated level. Descriptive statistics were estimated and the baseline  
46  
47 associations between independent variables, covariates and glycaemic control were tested with  
48  
49 Pearson chi<sup>2</sup>-tests or one-way analysis of variance depending on the measurement scale of the  
50  
51 variable of interest. Because the patients were nested within the 18 HC units, we used a two-level  
52  
53 modelling to account the data structure with job strain (or supervisor support) at the second level  
54  
55 and the outcome – patient-level glycaemic control – at the first level. We fitted five models using  
56  
57  
58  
59  
60

1  
2  
3 the multilevel logistic regression analysis. The first model, an empty model including only the  
4 random effect variable, was used to examine the clustering of the outcome between the 18 HCs.  
5  
6  
7 Then, we added job strain (or supervisor support) to examine its associations with the outcome.  
8  
9  
10 Next, we added patient-level confounders, after that HC characteristics and finally, variables  
11 describing socioeconomic composition of the HC service area (unadjusted model, model I, II and  
12 III). Because we used register data combined with aggregated variables describing HCs and HC  
13 catchment areas, there were only a few missing cases, and they were not included in the analyses.  
14  
15  
16 Statistical analyses were performed using SPSS version 19.0 and R-program, version 2.13.0.  
17  
18  
19  
20  
21  
22

## 23 RESULTS

24  
25 The baseline associations between independent variables, covariates and glycaemic control  
26 are presented in tables 1-2. The mean HbA1c level of patients was 7.1 (SD 1.2, range 4.5-  
27 19.1, Q1=6.3, median 6.8, Q3=7.6), and 43% had poor glycaemic control ( $\geq 7\%$ ). HCs did not  
28  
29 differ in the mean HbA1c-levels but the percentage of poor glycaemic control was highest in  
30  
31 high strain HCs. The mean rates of job control, job demands and supervisor support in the  
32  
33 HCs were 3.9, 3.6 and 3.6, respectively.  
34  
35  
36  
37  
38  
39

40 The socioeconomic characteristics of the HC service areas were as follows: residents with  
41 more than basic education in the patients' neighbourhood 73%, the median yearly income  
42 17203 euros, and the mean unemployment rate 7%. (Table 1)  
43  
44  
45  
46  
47  
48

49 Table 1 shows that the percentage of temporary employees in HCs was 22% being lowest in  
50 passive job HCs (12%) and highest in active job HCs (30%). The average number of sickness  
51 absence days was 14 days. It was lowest in low strain job HCs (9 days) and highest in passive  
52  
53  
54  
55  
56  
57  
58  
59  
60

1  
2  
3 job HCs (17 days). The socioeconomic composition of residents was most favourable in  
4  
5 active job HC service areas. (Table 1)  
6  
7

8  
9  
10 Table 2 shows that the percentage of temporary employees was highest in the moderate  
11  
12 supervisor support HCs (31%). The average number of sickness absence days was lowest in  
13  
14 high supervisor support HCs (10 days). Also the socioeconomic composition of residents was  
15  
16 more favourable than the average in the high support HC service areas as well as in the  
17  
18 moderate supervisor support HC areas.  
19

20 [Insert tables 1-2 somewhere here]  
21  
22

23  
24  
25 Table 3 shows that after adjustment for all covariates (model III) glycaemic control among  
26  
27 patients was less optimal in HCs where care personnel's perceived job strain was high  
28  
29 compared with HCs where job strain was low. Active and passive work HCs did not differ  
30  
31 statistically significantly from low strain HCs in the outcome of care. Also, supervisor support  
32  
33 was not associated with patients' glycaemic control (table 4).  
34

35 [Insert tables 3-4 somewhere here]  
36  
37  
38  
39

## 40 **DISCUSSION**

41  
42 This study showed that exposure to high job strain of primary health care personnel may be  
43  
44 associated with worse outcome of diabetes care. Glycaemic control among type 2 diabetes  
45  
46 patients was less optimal in high strain HCs than in low strain HCs. Supervisor support was  
47  
48 not associated with the outcome of care.  
49  
50

51  
52  
53  
54 Several studies have found the strong association between experienced work load and  
55  
56 burnout, particularly its exhaustion dimension<sup>25 26 27</sup>. Emotional exhaustion is further  
57  
58  
59

1  
2  
3 associated with low job performance shown in job withdrawal, deterioration of productivity  
4 and effectiveness<sup>27</sup>, and the outcome of care<sup>5 28</sup>. Recent studies on physicians show that their  
5  
6  
7 experienced job strain, stress and burnout are associated with increased risk of suboptimal  
8  
9 patient care and likelihood of making errors<sup>29-32</sup>. Exhausted employees are not effective,  
10  
11 accurate or innovative at work<sup>13</sup>. Instead, a favourable psychosocial work environment may  
12  
13 enhance employee well-being and motivate health care personnel to invent new working  
14  
15 methods and strengthen patients' motivation to self-care.  
16  
17  
18  
19

20  
21 However, patients' glycaemic control was not best in active jobs HCs as we predicted based  
22  
23 on the job strain model<sup>13</sup>. This result is in line with the results of the study on clinicians in  
24  
25 surgery by Klein et al.<sup>30</sup> They found that clinicians with active job reported suboptimal quality  
26  
27 of care more often than clinicians with low-strain job. It is possible that active work  
28  
29 assumption does not fit well in the health care sector. Active jobs give more challenges than  
30  
31 low strain jobs or passive jobs but the motivational potential of higher demands of active jobs  
32  
33 may be lost if demands are so high that they overwhelm health care personnel's capacities. In  
34  
35 that case high control or other job resources may have only limited capability of buffering the  
36  
37 undesired impact of high job demands<sup>25 33</sup>. Contrary to our prediction, social support from  
38  
39 supervisor was not associated with the outcome of care. The fact that doctors and nurses in the  
40  
41 Finnish HCs work quite independently is a potential explanation for this.  
42  
43  
44  
45  
46

47 Register data give reliable care results but also has limitations. It does not give information on  
48  
49 patients' socioeconomic status, such as educational level that is known to be strongly related  
50  
51 with health behaviour, many unhealthy behaviours like smoking, poor dietary habits and  
52  
53 physical inactivity being more prevalent in lower socioeconomic groups<sup>34</sup>. Healthy lifestyle  
54  
55 again is the key factor in management of diabetes<sup>21</sup>. However, we were able to use  
56  
57  
58  
59  
60

1  
2  
3 disadvantage of the patient's residential area as a proxy for individual socioeconomic  
4  
5 position. Indeed, the effect of job strain on glycaemic control emerged after adjustment of  
6  
7 educational level, income and unemployment rate in the HC catchment area. This result points  
8  
9 to suppression, a situation in which the magnitude of the relationship between an independent  
10  
11 variable and a dependent variable becomes larger when a third variable (or multiple variables)  
12  
13 is included to the analysis<sup>35</sup>  
14  
15

16  
17  
18 This was a cross-sectional study and no causal inferences of the associations between  
19  
20 independent and dependent variables can be made. Another limitation was that we did not  
21  
22 have information on patients' medication and comorbidity associated with type 2 diabetes<sup>36</sup>.  
23  
24 Neither did we have information on other aspects of the quality of care, such as numbers of  
25  
26 doctors or nurses per inhabitants in the HC service area indicating the sufficiency of staff.  
27  
28 This is an important question to be further studied. However, job strain can be seen as one  
29  
30 indicator of sufficiency of staff.  
31  
32  
33

34  
35  
36 Further, we did not have access to exact information on where the principal care responsibility  
37  
38 of the patients was. In spite of the fact that the patients had HbA1c-values measured via the  
39  
40 HC it is possible that some of them, at least the younger ones, had also visited separate private  
41  
42 or specialized public occupational health care units. In these cases, the psychosocial work  
43  
44 environment of these units is more crucial for the outcome of care. However, the majority of  
45  
46 the patients in the data were over 64 years old with many visits to the HC during 2006. Thus,  
47  
48 it is unlikely that their main care responsibility would have been somewhere else. Also, the  
49  
50 municipalities now studied, did not systematically differ in availability of care from  
51  
52 occupational health care units.  
53  
54  
55

1  
2  
3 This and previous studies suggest that the organization of care affects the quality and the  
4  
5 outcome of care<sup>5 11 30</sup>. However, research evidence is still limited. Follow-up studies  
6  
7 investigating the effect of changes in the psychosocial work environment of health care  
8  
9 personnel on change in glycaemic control of patients with type 2 diabetes, are needed as well  
10  
11 as interventions aiming at improving psychosocial work environment in health care. **The**  
12  
13 **studies of Bourbonnais et al.<sup>37 38</sup> showed that such interventions may have positive effect on**  
14  
15 **the psychosocial work environment and mental health of health care personnel.** Monitoring  
16  
17 HbA1c-values might be a useful tool in strategic leaderships of HCs because maintaining  
18  
19 good control is essential in order to prevent micro- and macrovascular complications of  
20  
21 diabetes and costs caused by these chronic diseases related to type 2 diabetes<sup>1</sup>.  
22  
23  
24  
25  
26

#### 27 **Funding statement**

28  
29 The work was supported by the Academy of Finland (The Finnish public sector study, projects  
30  
31 1129262, 129262) and the participating organizations.  
32  
33  
34

#### 35 **Competing Interest**

36  
37 None to declare  
38  
39  
40

#### 41 **Contributorship statement**

42  
43 Anne Koponen, the guarantor, formulated the initial hypotheses, designed the study, analyzed and  
44  
45 interpreted data, and wrote the manuscript. Jussi Vahtera, Sakari Suominen, Marianna Virtanen and  
46  
47 Mika Kivimäki formulated the initial hypotheses, designed the study, contributed to interpretation  
48  
49 of the data, and reviewed/edited the manuscript. Nina Simonsen-Rehn designed the study,  
50  
51 contributed to interpretation of the data, and reviewed/edited the manuscript. Jaana Pentti designed  
52  
53 the study, analyzed data, contributed to interpretation of the data, and reviewed/edited the  
54  
55  
56  
57  
58  
59  
60

1  
2  
3 manuscript. Janne Pitkaniemi analyzed data, contributed to interpretation of the data, and  
4  
5 reviewed/edited the manuscript.  
6  
7  
8  
9  
10  
11  
12  
13  
14  
15  
16  
17  
18  
19  
20  
21  
22  
23  
24  
25  
26  
27  
28  
29  
30  
31  
32  
33  
34  
35  
36  
37  
38  
39  
40  
41  
42  
43  
44  
45  
46  
47  
48  
49  
50  
51  
52  
53  
54  
55  
56  
57  
58  
59  
60

For peer review only

## References:

- 1 Fowler MJ. Microvascular and macrovascular complications of diabetes. *Clin Diab* 2008;**26**:77-82.
- 2 Al Khaja KAJ, Sequeira RP, Damanhori AHH. Comparison of the quality of diabetes care in primary care diabetic clinics and general practice clinics. *Diab Res Clin Pract* 2005;**70**:174-82.
- 3 Mathers CD, Loncar D. Projections of global mortality and burden of disease from 2002 to 2030. *PLoS Med* 2006;**3**:e442. doi:10.1371/journal.pmed.0030442
- 4 Koski S. Diabetesbarometri 2010. [Diabetes Barometer]. Suomen Diabetesliitto ry. Kehitys Oy 2011.
- 5 Aiken LH, Clarke SP, Sloane DM. Hospital staffing, organization, and quality of care: Cross-national findings. *Nurs Outlook* 2002a;**50**:187-94.
- 6 Collins MM, O’Sullivan T, Harkins V, Perry IJ. Quality of life and quality of care in patients with diabetes experiencing different models of care. *Diab Care* 2009;**32**:603-5.
- 7 McLean G, Guthrie B, Sutton M. Differences in the quality of primary medical care services by remoteness from urban settlements. *Qual Saf Health Care* 2007;**16**:446-9.
- 8 Litaker D, Mion LC, Planavsky L, et al. Physician – nurse practitioner teams in chronic disease management: the impact on costs, clinical effectiveness, and patients’ perception of care. *J Interprof Care* 2003;**17**:223-37.
- 9 Taylor CB, Miller NH, Reilly KR, et al. Evaluation of a nurse-care management system to improve outcomes in patients with complicated diabetes. *Diab Care* 2003;**26**:1058-63.
- 10 Linzer M, Baier Manwell L, Williams ES, et al. Working conditions in primary care: physician reactions and care quality. *Ann Intern Med* 2009;**151**:28-36.



- 1  
2  
3 11 Virtanen M, Oksanen T, Kawachi I, et al. Organizational justice in primary care health  
4 center and glycemic control among patients. *Med Care* 2012;**50**:831-5.  
5  
6  
7 12 Karasek RA. Job demands, job decision latitude, and mental strain: Implications for job  
8 redesign. *Adm Sci Q* 1979;**24**:285-308.  
9  
10  
11 13 Karasek RA, Theorell T. Healthy work. Stress, productivity, and the reconstruction of  
12 working life. New York: Basic Books 1990.  
13  
14  
15 14 Laamanen R, Simonsen-Rehn N, Suominen S, et al. Outsourcing primary health care  
16 services – How politicians explain the grounds for their decisions. *Health Policy* 2008;**88**:294-  
17 307.  
18  
19  
20  
21  
22 15 Teperi J, Porter ME, Vuorenkoski L, Baron JF. The Finnish health care system: a value-  
23 based perspective. *Sitra Reports* 2009;**82**. Helsinki: Sitra.  
24  
25  
26  
27 16 Kivimäki M, Lawlor DA, Davey Smith G, Kouvonen A, Virtanen M, Elovainio M,  
28 Vahtera J. Socioeconomic position, co-occurrence of behaviour-related risk factors, and  
29 coronary heart disease: The Finnish Public Sector Study. *Am J Public Health* 2007; **97**:874-  
30 979.  
31  
32  
33  
34  
35  
36 17 Karasek RA. Job Content Questionnaire and User's Guide. Revision 1.1. Los Angeles:  
37 Department of Industrial and Systems Engineering. University of Southern Los Angeles 1985.  
38  
39  
40 18 Vahtera J, Kivimäki M, Pentti J, Theorell T. Effect of change in the psychosocial work  
41 environment on sickness absence: a 7-year follow-up of initially healthy employees. *JECH*  
42 2000;**54**:484-93.  
43  
44  
45  
46  
47 19 Kivimäki M, Vahtera J, Pentti J, Ferrie J. Factors underlying the effect of organisational  
48 downsizing on health of employees: longitudinal cohort study. *BMJ* 2000; **320**: 971-975.  
49  
50  
51 20 Lehto A-M. Quality of working life and equity. Helsinki, Finland: Statistics Finland 1991.  
52  
53  
54 21 American Diabetes Association. Standards of medical care in diabetes - 2011. *Diab Care*  
55 2011;**34**(Suppl 1):P11-61.  
56  
57  
58  
59  
60

1  
2  
3 22 Virtanen M, Kivimäki M, Pentti J, et al. School neighborhood disadvantage as a predictor  
4 of long-term sick leave among teachers: Prospective cohort study. *Am J Epidemiol*  
5 2010;**171**:785-92.  
6  
7

8  
9 23 Kim D, Masyn KE, Kawachi I, et al. Neighborhood socioeconomic status and behavioral  
10 pathways to risks of colon and rectal cancer in women. *Cancer* 2010;**116**:4187-96.  
11

12 24 Diez Roux AV, Merkin SS, Arnett D, et al. Neighborhood of residence and incidence of  
13 coronary heart disease. *New Engl J Med* 2001;**345**:99-106.  
14

15 25 Bakker AB, Demerouti E, Verbeke, W. Using the job demands-resources model to predict  
16 burnout and performance. *HRM* 2004;**43**:83-104.  
17

18 26 Koponen AM, Laamanen R, Simonsen-Rehn N, et al. Psychosocial work environment and  
19 emotional exhaustion – Does a service provision model play a role? *Health Policy*,  
20 2010;**94**:111-19.  
21

22 27 Maslach C, Schaufeli WB, Leiter MP. Job burnout. *Annu Rev Psychol* 2001;**52**:397-422.  
23

24 28 Aiken LH, Clarke SP, Sloane DM, et al. Hospital nurse staffing and patient mortality,  
25 nurse burnout, and job dissatisfaction. *JAMA* 2002b;**288**:1987-93.  
26

27 29 Klein J, Grosse Frie K, Blum K, et al. Burnout and perceived quality of care among  
28 German clinicians in surgery. *IJQHC* 2010;**22**:525-30.  
29

30 30 Klein J, Grosse Frie K, Blum K, et al. Psychosocial stress at work and perceived quality of  
31 care among clinicians in surgery. *BMC Health Services Research* 2011;**11**:109.  
32

33 31 Wallace JE, Lemaire JB, Ghali WA. Physician wellness: a missing quality indicator.  
34 *Lancet* 2009;**374**:1714-21.  
35

36 32 Williams ES, Manwell LB, Konrad TR, et al. The relationship of organizational culture,  
37 stress, satisfaction, and burnout with physician-reported error and suboptimal patient care:  
38 Results from the MEMO study. *Health Care Manage Rev* 2007;**32**:203-212.  
39  
40  
41  
42  
43  
44  
45  
46  
47  
48  
49  
50  
51  
52  
53  
54  
55  
56  
57  
58  
59  
60

1  
2  
3 33 Koponen A, Laamanen R, Simonsen-Rehn N, Suominen S. Perusterveydenhuollon ja  
4 sosiaalitoimen henkilöstön työolot ja työuupumus neljässä kunnassa – Onko  
5 palvelutuotantomallilla väliä? [Psychosocial work environment and emotional exhaustion of  
6 primary health care and social sector personnel in four municipalities – Does a service  
7 provision model play a role?]. *Sosiaalilääketieteellinen aikakauslehti* 2007;**3**:163-75.

8  
9  
10  
11  
12  
13  
14 34 Laaksonen M, Talala K, Martelin T, et al. Health behaviours as explanations for  
15 educational level differences in cardiovascular and all-cause mortality: a follow-up of 60000  
16 men and women over 23 years. *EJPH* 2008;**18**:38-43.

17  
18  
19  
20  
21 35 MacKinnon DP, Krull JL, Lockwood CM. Equivalence of the mediation, confounding and  
22 suppression effect. *Prev Sci* 2000;**1**:173.

23  
24  
25  
26 36 Unwin N, Whiting D, Roglic G. Social determinants of diabetes and challenges of  
27 prevention. *The Lancet* 2010;**375**:2204-5.

28  
29  
30 37 Bourbonnais R, Brisson C, Vinet A, et al. Effectiveness of a participative intervention on  
31 psychosocial work factors to prevent mental health problems in a hospital setting. *Occup*  
32 *Environ Med* 2006;**63**:335-42.

33  
34  
35  
36 38 Bourbonnais R, Brisson C, Vézina M. Long-term effects of an intervention on  
37 psychosocial work factors among healthcare professionals in a hospital setting. *Occup*  
38 *Environ Med* 2011;**68**:479-86.

Table 1. Patient, health centre, and health centre service area characteristics in primary care health centres (HCs) varying in job strain.

| Job strain in primary care health centre                                           |                   |                                             |                                          |                                         |                                              |         |
|------------------------------------------------------------------------------------|-------------------|---------------------------------------------|------------------------------------------|-----------------------------------------|----------------------------------------------|---------|
|                                                                                    | All HCs<br>(N=18) | Low strain<br>job HCs <sup>3</sup><br>(n=4) | Passive<br>job HCs <sup>4</sup><br>(n=5) | Active<br>job HCs <sup>5</sup><br>(n=5) | High strain<br>job HCs <sup>6</sup><br>(n=4) | p-value |
| <i>Patient characteristics</i>                                                     |                   |                                             |                                          |                                         |                                              |         |
| Percentage of men <sup>1</sup>                                                     | 51                | 50                                          | 48                                       | 54                                      | 52                                           | <.001   |
| Age (mean/SD) <sup>2</sup>                                                         | 67 (11.6)         | 67 (10.9)                                   | 68 (11.2)                                | 66 (11.2)                               | 65 (11.2)                                    | <.001   |
| HbA1c<br>(mean/SD) <sup>2</sup>                                                    | 7.1 (1.2)         | 7.1 (1.2)                                   | 7.1 (1.1)                                | 7.1 (1.1)                               | 7.1 (1.1)                                    | ns.     |
| Patients with poor<br>glycaemic control<br>(HbA1c≥7%) (%) <sup>1</sup>             | 43                | 45                                          | 42                                       | 42                                      | 46                                           | <.05    |
| <b>N</b>                                                                           | <b>8975</b>       | <b>1999</b>                                 | <b>2862</b>                              | <b>2707</b>                             | <b>1407</b>                                  |         |
| <i>HC characteristics</i>                                                          |                   |                                             |                                          |                                         |                                              |         |
| Temporary employees<br>(%) <sup>1</sup>                                            | 22                | 28                                          | 12                                       | 30                                      | 16                                           | <.001   |
| Staff sickness absence<br>days (mean/SD) <sup>2</sup>                              | 14 (5.3)          | 9 (4.3)                                     | 17 (2.3)                                 | 12 (5.4)                                | 16 (5.5)                                     | <.001   |
| <i>Socioeconomic<br/>composition of HC<br/>service area</i>                        |                   |                                             |                                          |                                         |                                              |         |
| Percentage of the lowest<br>educational level <sup>1</sup>                         | 27                | 29                                          | 26                                       | 25                                      | 27                                           | <.001   |
| Median income level in<br>the HC service area,<br>euros<br>(mean, SD) <sup>2</sup> | 17203<br>(2556)   | 15660<br>(3057)                             | 16097<br>(756)                           | 18951<br>(2166)                         | 18280<br>(2301)                              | <.001   |
| Unemployment rate<br>(mean, SD) <sup>2</sup>                                       | 7<br>(2.9)        | 7<br>(3.3)                                  | 10<br>(1.6)                              | 4<br>(0.8)                              | 6<br>(1.2)                                   | <.001   |

1)  $\chi^2$ -test

2) 1-way ANOVA

3) Low demands and high control

4) Low demands and low control

5) High demands and high control

6) High demands and low control

Table 2. Patient, health centre, and health centre service area characteristics in primary care health centres (HCs) varying in supervisor support.

| Supervisor support in primary care health centre                              |                   |                             |                                  |                              |         |
|-------------------------------------------------------------------------------|-------------------|-----------------------------|----------------------------------|------------------------------|---------|
|                                                                               | All HCs<br>(N=18) | Low support<br>HCs<br>(n=6) | Moderate<br>support HCs<br>(n=6) | High<br>support HCs<br>(n=6) | p-value |
| <i>Patient characteristics</i>                                                |                   |                             |                                  |                              |         |
| Percentage of men <sup>1</sup>                                                | 51                | 48                          | 54                               | 52                           | <.001   |
| Age (mean/SD) <sup>2</sup>                                                    | 67 (11.2)         | 67 (11.3)                   | 66 (11.0)                        | 65 (11.6)                    | <.001   |
| HbA1c-value<br>(mean/SD) <sup>2</sup>                                         | 7.1 (1.2)         | 7.1 (1.3)                   | 7.1 (1.1)                        | 7.0 (1.1)                    | ns.     |
| Patients with poor<br>glycaemic control<br>(HbA1c $\geq$ 7%) (%) <sup>1</sup> | 43                | 44                          | 44                               | 41                           | ns.     |
| N                                                                             | 8975              | 3911                        | 3194                             | 1870                         |         |
| <i>HC characteristics</i>                                                     |                   |                             |                                  |                              |         |
| Temporary employees<br>(%) <sup>1</sup>                                       | 22                | 12                          | 31                               | 26                           | <.001   |
| Staff sickness absence<br>days (mean/SD) <sup>2</sup>                         | 14 (5.3)          | 15 (4.4)                    | 14 (4.5)                         | 10 (6.6)                     | <.001   |
| <i>Socioeconomic<br/>composition of HC<br/>service area</i>                   |                   |                             |                                  |                              |         |
| Percentage of the lowest<br>educational level <sup>1</sup>                    | 27                | 28                          | 26                               | 25                           | <.001   |
| Median income level,<br>euros (mean, SD) <sup>2</sup>                         | 17203<br>(2556)   | 15173<br>(1510)             | 18971<br>(2009)                  | 18429<br>(2055)              | <.001   |
| Unemployment rate<br>(mean/SD) <sup>2</sup>                                   | 7<br>(2.9)        | 10<br>(1.4)                 | 5<br>(1.4)                       | 5<br>(0.6)                   | <.01    |

1)  $\chi^2$ -test

2) 1-way ANOVA

Table 3. Level of perceived job strain among the health care personnel (doctors and nurses) as a predictor of poor glycaemic control indicator (HbA1c $\geq$ 7%) in patients with type 2 diabetes (N=8975) in primary care health centres (HCs, N=18).

| Job strain in the HC  | Unadjusted model |         | Model I*         |         | Model II**       |         | Model III***     |         |
|-----------------------|------------------|---------|------------------|---------|------------------|---------|------------------|---------|
|                       | OR (95% CI)      | p-value |
| <i>Fixed effects</i>  |                  |         |                  |         |                  |         |                  |         |
| Low strain job        | 1.00             |         | 1.00             |         | 1.00             |         | 1.00             |         |
| Passive job           | 0.96 (0.72-1.27) | ns.     | 0.96 (0.72-1.27) | ns.     | 0.97 (0.70-1.36) | ns.     | 1.08 (0.86-1.36) | ns.     |
| Active job            | 0.89 (0.68-1.18) | ns.     | 0.89 (0.67-1.19) | ns.     | 0.91 (0.69-1.20) | ns.     | 1.17 (0.96-1.43) | ns.     |
| High strain job       | 1.08 (0.80-1.47) | ns.     | 1.09 (0.80-1.48) | ns.     | 1.10 (0.78-1.56) | ns.     | 1.44 (1.12-1.86) | <.01    |
| <i>Random effects</i> |                  |         |                  |         |                  |         |                  |         |
| HC variance (SE)      | 0.04 (0.05)      |         | 0.04 (0.05)      |         | 0.04 (0.04)      |         | 0.01 (0.02)      |         |

Multilevel regression analysis

\*Adjusted for patient characteristics (sex and age)

\*\*Adjusted as model I + HC characteristics (the percentage of temporary employees and the mean rate of sickness absence days in the HC)

\*\*\* Adjusted as model II + HC service area characteristics (educational level of the residents, median income and unemployment rate)

Table 4. Level of perceived supervisor support among the health care personnel (doctors and nurses) as a predictor of poor glycaemic control indicator ( $HbA1c \geq 7\%$ ) in patients with type 2 diabetes ( $N=8975$ ) in primary care health centres (HCs,  $N=18$ ).

| Supervisor support in the HCs | Unadjusted model |         | Model I*         |         | Model II**       |         | Model III***     |         |
|-------------------------------|------------------|---------|------------------|---------|------------------|---------|------------------|---------|
|                               | OR (95% CI)      | p-value |
| <i>Fixed effects</i>          |                  |         |                  |         |                  |         |                  |         |
| <b>High support</b>           | 1.00             |         | 1.00             |         | 1.00             |         | 1.00             |         |
| <b>Medium support</b>         | 1.11 (0.86-1.43) | ns.     | 1.11 (0.86-1.43) | ns.     | 1.17 (0.90-1.53) | ns.     | 1.14 (0.95-1.36) | ns.     |
| <b>Low support</b>            | 1.13 (0.88-1.45) | ns.     | 1.13 (0.88-1.45) | ns.     | 1.10 (0.84-1.44) | ns.     | 0.87 (0.65-1.16) | ns.     |
| <i>Random effects</i>         |                  |         |                  |         |                  |         |                  |         |
| <b>HC variance (SE)</b>       | 0.04 (0.05)      |         | 0.04 (0.05)      |         | 0.03 (0.04)      |         | 0.01 (0.02)      |         |

Multilevel regression analysis

\*Adjusted for patient characteristics (sex and age)

\*\*Adjusted as model I + HC characteristics (the percentage of temporary employees and the mean rate of sickness absence days in the HC)

\*\*\* Adjusted as model II + HC service area characteristics (educational level of the residents, median income and unemployment rate)

STROBE 2007 (v4) Statement—Checklist of items that should be included in reports of cross-sectional studies

| Section/Topic             | Item # | Recommendation                                                                                                                                                                       | Reported on page #                                  |
|---------------------------|--------|--------------------------------------------------------------------------------------------------------------------------------------------------------------------------------------|-----------------------------------------------------|
| Title and abstract        | 1      | (a) Indicate the study’s design with a commonly used term in the title or the abstract                                                                                               | 1                                                   |
|                           |        | (b) Provide in the abstract an informative and balanced summary of what was done and what was found                                                                                  | 2                                                   |
| <b>Introduction</b>       |        |                                                                                                                                                                                      |                                                     |
| Background/rationale      | 2      | Explain the scientific background and rationale for the investigation being reported                                                                                                 | 4-5                                                 |
| Objectives                | 3      | State specific objectives, including any prespecified hypotheses                                                                                                                     | 5                                                   |
| <b>Methods</b>            |        |                                                                                                                                                                                      |                                                     |
| Study design              | 4      | Present key elements of study design early in the paper                                                                                                                              | 5-6                                                 |
| Setting                   | 5      | Describe the setting, locations, and relevant dates, including periods of recruitment, exposure, follow-up, and data collection                                                      | 5-6                                                 |
| Participants              | 6      | (a) Give the eligibility criteria, and the sources and methods of selection of participants                                                                                          | 5-6                                                 |
| Variables                 | 7      | Clearly define all outcomes, exposures, predictors, potential confounders, and effect modifiers. Give diagnostic criteria, if applicable                                             | 6-7                                                 |
| Data sources/ measurement | 8*     | For each variable of interest, give sources of data and details of methods of assessment (measurement). Describe comparability of assessment methods if there is more than one group | 6-7                                                 |
| Bias                      | 9      | Describe any efforts to address potential sources of bias                                                                                                                            | 6 (all patients with type 2 diabetes were included) |
| Study size                | 10     | Explain how the study size was arrived at                                                                                                                                            | 5-6                                                 |
| Quantitative variables    | 11     | Explain how quantitative variables were handled in the analyses. If applicable, describe which groupings were chosen and why                                                         | 6-7                                                 |
| Statistical methods       | 12     | (a) Describe all statistical methods, including those used to control for confounding                                                                                                | 7-8                                                 |
|                           |        | (b) Describe any methods used to examine subgroups and interactions                                                                                                                  |                                                     |
|                           |        | (c) Explain how missing data were addressed                                                                                                                                          | 8                                                   |
|                           |        | (d) If applicable, describe analytical methods taking account of sampling strategy                                                                                                   |                                                     |

1  
2  
3  
4  
5  
6  
7  
8  
9  
10  
11  
12  
13  
14  
15  
16  
17  
18  
19  
20  
21  
22  
23  
24  
25  
26  
27  
28  
29  
30  
31  
32  
33  
34  
35  
36  
37  
38  
39  
40  
41  
42  
43  
44  
45  
46  
47  
48  
49



|                          |     |                                                                                                                                                                                                                                                                                                                                                                                                               |                          |
|--------------------------|-----|---------------------------------------------------------------------------------------------------------------------------------------------------------------------------------------------------------------------------------------------------------------------------------------------------------------------------------------------------------------------------------------------------------------|--------------------------|
|                          |     | (e) Describe any sensitivity analyses                                                                                                                                                                                                                                                                                                                                                                         |                          |
| <b>Results</b>           |     |                                                                                                                                                                                                                                                                                                                                                                                                               |                          |
| Participants             | 13* | (a) Report numbers of individuals at each stage of study—eg numbers potentially eligible, examined for eligibility, confirmed eligible, included in the study, completing follow-up, and analysed<br>(b) Give reasons for non-participation at each stage<br>(c) Consider use of a flow diagram                                                                                                               | 5-7, 15-18               |
| Descriptive data         | 14* | (a) Give characteristics of study participants (eg demographic, clinical, social) and information on exposures and potential confounders<br>(b) Indicate number of participants with missing data for each variable of interest                                                                                                                                                                               | 8, 15-16                 |
| Outcome data             | 15* | Report numbers of outcome events or summary measures                                                                                                                                                                                                                                                                                                                                                          |                          |
| Main results             | 16  | (a) Give unadjusted estimates and, if applicable, confounder-adjusted estimates and their precision (eg, 95% confidence interval). Make clear which confounders were adjusted for and why they were included<br>(b) Report category boundaries when continuous variables were categorized<br>(c) If relevant, consider translating estimates of relative risk into absolute risk for a meaningful time period | 8, 10, 15-18<br>6, 17-18 |
| Other analyses           | 17  | Report other analyses done—eg analyses of subgroups and interactions, and sensitivity analyses                                                                                                                                                                                                                                                                                                                |                          |
| <b>Discussion</b>        |     |                                                                                                                                                                                                                                                                                                                                                                                                               |                          |
| Key results              | 18  | Summarise key results with reference to study objectives                                                                                                                                                                                                                                                                                                                                                      | 8-9                      |
| Limitations              | 19  | Discuss limitations of the study, taking into account sources of potential bias or imprecision. Discuss both direction and magnitude of any potential bias                                                                                                                                                                                                                                                    | 10                       |
| Interpretation           | 20  | Give a cautious overall interpretation of results considering objectives, limitations, multiplicity of analyses, results from similar studies, and other relevant evidence                                                                                                                                                                                                                                    | 10                       |
| Generalisability         | 21  | Discuss the generalisability (external validity) of the study results                                                                                                                                                                                                                                                                                                                                         | 10-11                    |
| <b>Other information</b> |     |                                                                                                                                                                                                                                                                                                                                                                                                               |                          |
| Funding                  | 22  | Give the source of funding and the role of the funders for the present study and, if applicable, for the original study on which the present article is based                                                                                                                                                                                                                                                 | 11                       |

\*Give information separately for cases and controls in case-control studies and, if applicable, for exposed and unexposed groups in cohort and cross-sectional studies.

**Note:** An Explanation and Elaboration article discusses each checklist item and gives methodological background and published examples of transparent reporting. The STROBE checklist is best used in conjunction with this article (freely available on the Web sites of PLoS Medicine at <http://www.plosmedicine.org/>, Annals of Internal Medicine at <http://www.annals.org/>, and Epidemiology at <http://www.epidem.com/>). Information on the STROBE Initiative is available at [www.strobe-statement.org](http://www.strobe-statement.org).



**Job strain and supervisor support in primary care health centres and glycaemic control among patients with type 2 diabetes – a cross-sectional study**

|                                 |                                                                                                                                                                                                                                                                                                                                                                                                                                                                                                                                                                                                                                                                                                                                                                                                                                                                                                    |
|---------------------------------|----------------------------------------------------------------------------------------------------------------------------------------------------------------------------------------------------------------------------------------------------------------------------------------------------------------------------------------------------------------------------------------------------------------------------------------------------------------------------------------------------------------------------------------------------------------------------------------------------------------------------------------------------------------------------------------------------------------------------------------------------------------------------------------------------------------------------------------------------------------------------------------------------|
| Journal:                        | <i>BMJ Open</i>                                                                                                                                                                                                                                                                                                                                                                                                                                                                                                                                                                                                                                                                                                                                                                                                                                                                                    |
| Manuscript ID:                  | bmjopen-2012-002297.R2                                                                                                                                                                                                                                                                                                                                                                                                                                                                                                                                                                                                                                                                                                                                                                                                                                                                             |
| Article Type:                   | Research                                                                                                                                                                                                                                                                                                                                                                                                                                                                                                                                                                                                                                                                                                                                                                                                                                                                                           |
| Date Submitted by the Author:   | 20-Mar-2013                                                                                                                                                                                                                                                                                                                                                                                                                                                                                                                                                                                                                                                                                                                                                                                                                                                                                        |
| Complete List of Authors:       | Koponen, Anne; Hjelt Institute, Public Health; Folkhälsan Research Center, Public Health<br>Vahtera, Jussi; University of Turku, Public Health; Finnish Institute of Occupational Health, Unit of Expertise in Work and Organizations<br>Pitkäniemi, Janne; Hjelt Institute, Public Health<br>Virtanen, Marianna; Finnish Institute of Occupational Health, Unit of Expertise in Work and Organizations<br>Pentti, Jaana; Finnish Institute of Occupational Health, Unit of Expertise in Work and Organizations<br>Simonsen-Rehn, Nina; Hjelt Institute, Public Health; Folkhälsan Research Center, Public Health<br>Kivimäki, Mika; Finnish Institute of Occupational Health, Unit of Expertise in Work and Organizations; University of Helsinki, Institute of Behavioral Sciences<br>Suominen, Sakari; Nordic School of Public Health, Public Health; Folkhälsan Research Center, Public Health |
| <b>Primary Subject Heading</b>: | Health services research                                                                                                                                                                                                                                                                                                                                                                                                                                                                                                                                                                                                                                                                                                                                                                                                                                                                           |
| Secondary Subject Heading:      | Public health, Diabetes and endocrinology, Occupational and environmental medicine                                                                                                                                                                                                                                                                                                                                                                                                                                                                                                                                                                                                                                                                                                                                                                                                                 |
| Keywords:                       | General diabetes < DIABETES & ENDOCRINOLOGY, Organisation of health services < HEALTH SERVICES ADMINISTRATION & MANAGEMENT, Quality in health care < HEALTH SERVICES ADMINISTRATION & MANAGEMENT, PRIMARY CARE                                                                                                                                                                                                                                                                                                                                                                                                                                                                                                                                                                                                                                                                                     |
|                                 |                                                                                                                                                                                                                                                                                                                                                                                                                                                                                                                                                                                                                                                                                                                                                                                                                                                                                                    |

SCHOLARONE™  
Manuscripts

1  
2  
3 **Job strain and supervisor support in primary care health centres and**  
4  
5 **glycaemic control among patients with type 2 diabetes – a cross-sectional**  
6  
7 **study**  
8  
9

10  
11  
12 Koponen, Anne <sup>1 2</sup>; Vahtera , Jussi <sup>3 4</sup>; Pitkäniemi, Janne <sup>1</sup>; Virtanen, Marianna <sup>4</sup>; Pentti, Jaana <sup>4</sup>;  
13 Simonsen-Rehn <sup>1 2</sup>, Nina; Kivimäki <sup>4 5</sup>, Mika; Suominen, Sakari <sup>6 2</sup>  
14  
15

- 16  
17  
18 1. Hjelt Institute - Public Health  
19 Helsinki Finland  
20 2. Folkhälsan Research Center - Public Health  
21 Helsinki Finland  
22 3. University of Turku - Public Health  
23 Turku Finland  
24 4. Finnish Institute of Occupational Health - Unit of Expertise in Work and Organizations  
25 Helsinki Finland  
26 5. University of Helsinki - Institute of Behavioral Sciences  
27 Helsinki Finland  
28 6. Nordic School of Public Health - Public Health  
29 Göteborg Sweden  
30  
31

32  
33 **Keywords:** General diabetes < DIABETES & ENDOCRINOLOGY, Organisation of health services < HEALTH  
34 SERVICES ADMINISTRATION & MANAGEMENT, Quality in health care < HEALTH SERVICES  
35 ADMINISTRATION & MANAGEMENT, PRIMARY CARE  
36

37 Word Count: 2756  
38  
39  
40  
41  
42  
43  
44  
45  
46  
47  
48  
49  
50  
51  
52  
53  
54  
55  
56  
57  
58  
59  
60

## Abstract

**Objectives** This study investigates associations between health care personnel's perceived job strain, supervisor support and the outcome of care in terms of glycaemic control among patients with type 2 diabetes.

**Design** A cross-sectional study from 2006.

**Setting** Eighteen primary care health centres (HCs) from five municipalities in Finland.

**Participants** Aggregated survey data on perceived job strain and supervisor support from health care personnel (doctors, n=122, mean age 45.5 years, nurses, n=300, mean age 47.1 years) were combined with registered data (Electronic Medical Records) from 8975 patients (51% men, mean age 67 years) with type 2 diabetes.

**Outcome measure** Poor glycaemic control (HbA1c  $\geq 7\%$ ).

**Results** The mean HbA1c-level among the patients with type 2 diabetes was 7.1 (SD 1.2, range 4.5-19.1), and 43% had poor glycaemic control (HbA1c  $\geq 7\%$ ). Multilevel logistic regression analyses adjusted for patient's age and sex, and HC- and HC service area-level characteristics showed that patients' HbA1c-levels were less optimal in high strain HCs than in low strain HCs (OR 1.44, 95% CI 1.12-1.86). Supervisor support in HCs was not associated with the outcome of care.

**Conclusion** The level of job strain among the health care personnel may play a role in achieving good glycaemic control among patients with type 2 diabetes.

## ARTICLE SUMMARY

### Article focus

- This paper focuses on the association between job strain and supervisor support of health care personnel and the outcome of care among patients with type 2 diabetes.

### Key message

- HbA1c-levels were less optimal in primary care health centres where health care personnel's perceived job strain was high compared with primary care health centres where perceived job strain was low.

### Strengths and limitations of this study

- Previous studies suggest that the organization of care can affect the quality and the outcome of care in diabetes. This study showed that job strain of health care personnel may be one key factor associated with glycaemic control among patients with type 2 diabetes.
- We did not have information on patients' health behaviour, medication and comorbidity associated with type 2 diabetes.

## INTRODUCTION

Diabetes mellitus is an important and increasing public health problem worldwide<sup>1 2 3</sup>. In Finland, about 10% of the population has diabetes of which a majority is of type 2<sup>4</sup>. Primary health care faces a serious challenge to provide high quality care in order to decrease complications, mortality and costs caused by this public health burden.

Health care organizations may differ in the quality of care<sup>5</sup>. However, we know only little about organizational aspects that promote good care of diabetes. One aspect may relate to the organization of care. Collins et al.<sup>6</sup> showed that compliance to diabetes care was better in structured general practitioner (GP) care than in traditional hospital care or in hospital/GP shared care. McLean et al.<sup>7</sup> found that the intermediate outcome target in cholesterol measurement of diabetic patients was achieved more often in urban practices than in very remote rural practices. Medical outcomes of care in type 2 diabetes have been shown to be better in physician-nurse practitioner teams than in care provided by a physician alone<sup>8 9</sup>. Linzer et al.<sup>10</sup> found that good organizational culture with high values alignment with leadership and work control was associated with higher-quality care for diabetic patients. In the study by Virtanen et al.<sup>11</sup> perception of procedural justice among staff was associated with more optimal glycaemic control among patients.

More research on the associations between organizational factors and the quality of care, especially the outcome of care, in diabetes is needed. Based on the theory of Karasek<sup>12</sup> and Karasek & Theorell<sup>13</sup> equilibrium between personnel's job demands and job control as well as social support at work might be important organizational factors associated with the quality of care. Active work with high demands and high control most likely promotes high quality care<sup>13</sup>. High demands give challenges, motivation and promote learning but combined with high control high demands do not cause negative psychological strain. Instead, high-strain work with high demands and low control

1  
2  
3 exhausts personnel and decreases productivity. Low-strain work with high control and low demands  
4  
5 may not offer optimal challenges, and passive work with low demands and low control may lead to  
6  
7 apathy and loss of learned skills and abilities. Besides an optimal balance between job demands and  
8  
9 job control, also social support at work is likely to promote good health, learning and productivity<sup>13</sup>.  
10  
11 Social support can, for example, buffer the negative effect of psychological stressors on employee  
12  
13 health, and co-workers and supervisors are valuable sources of information and expertise.  
14  
15  
16  
17

## 18 AIM AND HYPOTHESES OF THE STUDY

19  
20 The aim of this study was to investigate associations between health care personnel's perceived job  
21  
22 strain, supervisor support and the outcome of care in terms of glycaemic control among patients  
23  
24 with type 2 diabetes. We hypothesize that glycaemic control is best achieved in primary care health  
25  
26 centres where health care personnel have possibility to active work and high supervisor support.  
27  
28  
29  
30  
31

## 32 METHODS

### 33 Study context

34  
35 The study was conducted in 18 primary care health centres (HCs) in five municipalities in Finland.  
36  
37 Municipalities differed in size (about 7500-200000 inhabitants) and the number of HCs in each  
38  
39 municipality (1-10). In Finland, municipalities are responsible for organizing primary health care  
40  
41 services and cover the costs together with the state. Primary health care services are provided by  
42  
43 HCs that offer a wide range of care services including doctor and nurse services<sup>14</sup> and have a central  
44  
45 role in disease management for major chronic conditions like diabetes<sup>15</sup>. Three of the five  
46  
47 municipalities had a family doctor system in their HCs. The two other municipalities had the  
48  
49 traditional model in which appointments can be made with any doctor in the HC. All HCs had a  
50  
51 diabetes nurse. One city had also a clinic specialized for prevention and care of chronic conditions.  
52  
53 Patients from HCs could be referred there for additional advice and care.  
54  
55  
56  
57  
58  
59  
60

## Data collection and participants

The data to this cross-sectional study were gathered in 2006. Information on job strain and supervisor support in 18 HCs is based on responses of doctors (n=122, mean age 45.5 years) and nurses (n=300, mean age 47.1 years), who took part in the Finnish Public Sector Study<sup>16</sup>, a voluntary-basis survey addressed to local government personnel of the participating towns (response rate 79%). Information on sex, age, the postal zip code of area of residence and glycaemic control (HbA1c-values) of patients with the diagnosis of type 2 diabetes (N=8975, 51% men, mean age 67 years, SD 11, range 16-106 years) was collected from HC registers (Electronic Medical Records) by the contact persons who worked in HCs. They delivered anonymous data to researchers. Aggregated variables indicating the levels of job strain and social support (based on survey responses of doctors and nurses) were created for each HC and linked to patient data. Thus, each patient has information in her/his individual data on job strain and supervisor support in the HC that had responsibility of her/his diabetes care.

Because all patient data included only a very limited set of variables without any identification code it was totally anonymous. Thus, no informed consent was needed. Instead, a written approval based on a brief description of the study was applied for and granted by all chief physicians responsible for the organization and administration of primary care in the involved municipalities.

## Measures

### Job strain and supervisor support

Aggregated measure of job strain was derived from the responses of doctors and nurses (n=422) to questions measuring job demands (5 items) and job control (9 items) derived from the Job Content Questionnaire<sup>17</sup>. Aggregated measure of social support from the supervisor<sup>18 19</sup> (4 items) was



1  
2  
3 derived from a standard survey instrument of Statistics Finland<sup>20</sup>. A 5-point Likert-type response  
4  
5 format ranging from 1 (totally agree) to 5 (totally disagree) was used for all items. A mean score for  
6  
7 the constructs was computed and the individual scores were then used to measure aggregated scores  
8  
9 of job strain and supervisor support for each work unit (HC) based on the identification of each  
10  
11 participant's work unit obtained from employers' administrative records.  
12

13  
14  
15  
16 To create a job strain indicator for each HC, aggregated demands and control were split on the  
17  
18 median and combined to four categories: low strain jobs (low demands combined with high control,  
19  
20 4 HCs), active jobs (high demands combined with high control, 5 HCs), passive jobs (low demands  
21  
22 combined with low control, 5 HCs), and high strain jobs (high demands combined with low control,  
23  
24 4 HCs)<sup>12</sup>. To create a supervisor support indicator for each HC, aggregated supervisor support was  
25  
26 split into three equal groups indicating low, medium and high support (6 HCs in each group).  
27  
28  
29

30  
31  
32 Job strain and supervisor support indicators for each HC were created based on the responses of  
33  
34 doctors and nurses because doctors and nurses work quite independently in HCs and these two  
35  
36 professional groups both affect the quality of care. Aggregated job demands of doctors were higher  
37  
38 (mean 3.9, range 3.0-4.4) than job demands of nurses (mean 3.5, range 2.8-4.3). Aggregated job  
39  
40 control of doctors was also somewhat higher (mean 3.9, range 3.7-4.3) than job control of nurses  
41  
42 (mean 3.8, range 3.6-4.2). In aggregated supervisor support there was no difference between doctors  
43  
44 (mean 3.6, range 2.5-5.0) and nurses (3.6, range 2.9-4.5).  
45  
46  
47  
48

#### 49 Glycaemic control

50  
51 Glycaemic control was determined by 1 year's measurements of glycated haemoglobin (HbA1c)  
52  
53 value. In case of several control measurements the mean HbA1c-value was calculated (mean  
54  
55 number of measurements was 2.1, range 1-15). Of the patients, 35% had one measurement. Based  
56  
57  
58  
59  
60

1  
2  
3 on the standards of medical care in diabetes<sup>21 22</sup> we used a value under 7% to indicate good and a  
4  
5 value of 7 or higher to indicate poor glycaemic control. For an additional secondary analysis we  
6  
7 used HbA1c-value of 8% as a cut point.  
8  
9

### 10 11 **Background variables**

12  
13  
14 *Patient characteristics:* Information on age, sex, and the postal zip code of area of residence of each  
15  
16 patient was obtained from the HC's registers.  
17

18  
19 *HC characteristics:* The proportion of temporary employees and the mean rate of sickness absence  
20  
21 days in the work unit in 2006 were drawn from employers' registers<sup>23</sup>.  
22

23  
24 *HC service area characteristics:* By using the patient postal zip codes and data obtained from  
25  
26 Statistics Finland we formulated the average educational level (percentage of adults aged >18 years  
27  
28 whose highest education level is elementary school), the median income and the unemployment rate  
29  
30 (unemployed persons belonging to the workforce divided by total workforce) of the residents in the  
31  
32 HC catchment area, that is, the population-weighted means for residents in the specific areas that  
33  
34 each HC served. The mean for each variable for each HC was calculated and linked to individual  
35  
36 data on each patient. Educational level, income and unemployment rate are standard variables to  
37  
38 characterize areal disadvantage and deprivation<sup>24 25</sup>.  
39  
40  
41  
42

### 43 **Statistical analysis**

44  
45 The statistical data analysis was carried out within individual patient data (N=8975) with HC  
46  
47 characteristics on an aggregated level. Descriptive statistics were estimated and the baseline  
48  
49 associations between independent variables, covariates and glycaemic control were tested with  
50  
51 Pearson chi<sup>2</sup>-tests or one-way analysis of variance depending on the measurement scale of the  
52  
53 variable of interest. Because the patients were nested within the 18 HC units, we used a two-level  
54  
55 modelling to account the data structure with job strain (or supervisor support) at the second level  
56  
57  
58  
59  
60

1  
2  
3 and the outcome – patient-level glycaemic control – at the first level. We fitted five models using  
4  
5 the multilevel logistic regression analysis. The first model, an empty model including only the  
6  
7 random effect variable, was used to examine the clustering of the outcome between the 18 HCs.  
8  
9 Then, we added job strain (or supervisor support) to examine its associations with the outcome.  
10  
11 Next, we added patient-level confounders, after that HC characteristics and finally, variables  
12  
13 describing socioeconomic composition of the HC service area (unadjusted model, model I, II and  
14  
15 III). Because we used register data combined with aggregated variables describing HCs and HC  
16  
17 catchment areas, there were only a few missing cases, and they were not included in the analyses.  
18  
19 Statistical analyses were performed using SPSS version 19.0 and R-program, version 2.13.0.  
20  
21  
22  
23  
24

## 25 RESULTS

26  
27 Tables 1-2 show baseline associations between independent variables, covariates and  
28  
29 glycaemic control. The mean HbA1c level of patients was 7.1 (SD 1.2, range 4.5-19.1,  
30  
31 Q1=6.3, median 6.8, Q3=7.6), and 43% had poor glycaemic control ( $\geq 7\%$ ). HCs did not differ  
32  
33 in the mean HbA1c-levels but the percentage of poor glycaemic control was highest in high  
34  
35 strain HCs.  
36  
37  
38  
39

40  
41 The mean percentage of temporary employees in HCs was 22% and the average amount of  
42  
43 sickness absence days was 14 days. The socioeconomic characteristics of the HC service  
44  
45 areas were as follows: the mean proportion of residents in the patients' neighbourhood with  
46  
47 only basic education was 27%, the median yearly income was 17203 euros, and the mean  
48  
49 unemployment rate was 7%. (Table 1). The mean rates of job control, job demands and  
50  
51 supervisor support in the HCs were 3.9, 3.6 and 3.6, respectively.  
52  
53  
54  
55

56 [Insert tables 1-2 somewhere here]  
57  
58  
59  
60

1  
2  
3  
4  
5 Tables 3-4 show that after adjustment for all covariates (model III) glycaemic control among  
6  
7 patients was less optimal in HCs where care personnel's perceived job strain was high  
8  
9 compared with HCs where job strain was low. Active and passive work HCs did not differ  
10  
11 statistically significantly from low strain HCs in the outcome of care. Also, supervisor support  
12  
13 was not associated with patients' glycaemic control (table 5).  
14

15  
16 [Insert tables 3-5 somewhere here]  
17  
18  
19

## 20 21 **DISCUSSION**

22  
23 This study showed that perceived job strain of health care personnel may be associated with  
24  
25 the outcome of diabetes care. Glycaemic control among type 2 diabetes patients was less  
26  
27 optimal in high strain HCs than in low strain HCs. Supervisor support was not associated with  
28  
29 the outcome of care.  
30

31  
32  
33  
34 Several studies have found strong associations between experienced work load and burnout,  
35  
36 particularly its exhaustion dimension<sup>26 27 28</sup>. Emotional exhaustion is further associated with  
37  
38 low job performance shown in job withdrawal, deterioration of productivity and  
39  
40 effectiveness<sup>28</sup>, and the outcome of care<sup>5 29</sup>. Recent studies on physicians show that their  
41  
42 experienced job strain, stress and burnout are associated with increased risk of suboptimal  
43  
44 patient care and likelihood of making errors<sup>30-33</sup>. Exhausted employees are not effective,  
45  
46 accurate or innovative at work<sup>13</sup>. Instead, a favourable psychosocial work environment may  
47  
48 enhance employee well-being and motivate health care personnel to invent new working  
49  
50 methods and strengthen patients' motivation to self-care.  
51  
52  
53  
54  
55  
56  
57  
58  
59  
60

1  
2  
3 However, patients' glycaemic control was not best in active jobs HCs as we predicted based  
4 on the job strain model<sup>13</sup>. This result is in line with the results of the study on clinicians in  
5 surgery by Klein et al.<sup>31</sup> They found that clinicians with active job reported suboptimal quality  
6 of care more often than clinicians with low-strain job. It is possible that active work  
7 assumption does not fit well in the health care sector. Active jobs give more challenges than  
8 low strain jobs or passive jobs but the motivational potential of higher demands of active jobs  
9 may be lost if demands are so high that they overwhelm health care personnel's capacities. In  
10 that case high control or other job resources may have only limited capability of buffering the  
11 undesired impact of high job demands<sup>26 34</sup>. Contrary to our prediction, social support from  
12 supervisor was not associated with the outcome of care. The fact that doctors and nurses in the  
13 Finnish HCs work quite independently is a potential explanation for this. Doctors and nurses  
14 consult patients alone in separate appointments. Therefore, supervisor support may not play a  
15 great role in daily appointments with patients and the outcome of care.  
16  
17  
18  
19  
20  
21  
22  
23  
24  
25  
26  
27  
28  
29  
30  
31  
32  
33

34 Register data give reliable care results but also has limitations. It does not give information on  
35 patients' socioeconomic status, such as educational level that is known to be strongly related  
36 with health behaviour, many unhealthy behaviours like smoking, poor dietary habits and  
37 physical inactivity being more prevalent in lower socioeconomic groups<sup>35</sup>. Healthy lifestyle  
38 again is the key factor in management of diabetes<sup>21</sup>. However, we were able to use  
39 disadvantage of the patient's residential area as a proxy for individual socioeconomic  
40 position. Indeed, the effect of job strain on glycaemic control emerged after adjustment of  
41 educational level, income and unemployment rate in the HC catchment area. This result points  
42 to suppression, a situation in which the magnitude of the relationship between an independent  
43 variable and a dependent variable becomes larger when a third variable (or multiple variables)  
44 is included to the analysis<sup>36</sup>  
45  
46  
47  
48  
49  
50  
51  
52  
53  
54  
55  
56  
57  
58  
59  
60

1  
2  
3  
4  
5 This was a cross-sectional study and no causal inferences of the associations between  
6 independent and dependent variables can be made. Another limitation was that we did not  
7 have information on patients' medication and comorbidity associated with type 2 diabetes<sup>37</sup>.  
8  
9 Neither did we have information on other aspects of the quality of care, such as numbers of  
10 doctors or nurses per inhabitants in the HC service area indicating the sufficiency of staff.  
11  
12 This is an important question to be further studied. However, job strain can be seen as one  
13 indicator of sufficiency of staff.  
14  
15  
16  
17  
18  
19

20  
21  
22 Further, we did not have access to exact information on where the principal care responsibility  
23 of the patients was. In spite of the fact that the patients had HbA1c-values measured via the  
24 HC it is possible that some of them, at least the younger ones, had also visited separate private  
25 or specialized public occupational health care units. In these cases, the psychosocial work  
26 environment of these units is more crucial for the outcome of care. However, the majority of  
27 the patients in the data were over 64 years old with many visits to the HC during 2006. Thus,  
28 it is unlikely that their main care responsibility would have been somewhere else. Also, the  
29 municipalities now studied, did not systematically differ in availability of care from  
30 occupational health care units.  
31  
32  
33  
34  
35  
36  
37  
38  
39  
40  
41  
42  
43  
44

45 This and previous studies suggest that the organization of care is associated with the quality and the  
46 outcome of care<sup>5 11 31</sup>. However, research evidence is still limited. Further studies including all  
47 relevant confounding factors are needed. Some of those factors may be equally or more strongly  
48 associated with patients' glycaemic control than the organization of care. In addition, follow-up  
49 studies investigating the effect of changes in the psychosocial work environment, for example in job  
50 strain, of health care personnel on change in glycaemic control of patients with type 2 diabetes, are  
51  
52  
53  
54  
55  
56  
57  
58  
59  
60

1  
2  
3 needed as well as interventions aiming at improving psychosocial work environment in health care.  
4  
5 The studies of Bourbonnais et al.<sup>38 39</sup> showed that such interventions may have positive effect on the  
6  
7 psychosocial work environment and mental health of health care personnel. Monitoring HbA1c-  
8  
9 values might be a useful tool in strategic leaderships of HCs because maintaining good glycaemic  
10  
11 control is essential in order to prevent micro- and macrovascular complications of diabetes and  
12  
13 costs caused by these chronic diseases related to type 2 diabetes<sup>1</sup>.  
14  
15  
16  
17

### 18 **Funding statement**

19  
20 The work was supported by the Academy of Finland (The Finnish public sector study, projects  
21  
22 1129262, 129262) and the participating organizations.  
23  
24

### 25 **Competing Interest**

26  
27 None to declare  
28  
29  
30  
31

### 32 **Contributorship statement**

33  
34 Anne Koponen, the guarantor, formulated the initial hypotheses, designed the study, analyzed and  
35  
36 interpreted data, and wrote the manuscript. Jussi Vahtera, Sakari Suominen, Marianna Virtanen and  
37  
38 Mika Kivimäki formulated the initial hypotheses, designed the study, contributed to interpretation  
39  
40 of the data, and reviewed/edited the manuscript. Nina Simonsen-Rehn designed the study,  
41  
42 contributed to interpretation of the data, and reviewed/edited the manuscript. Jaana Pentti designed  
43  
44 the study, analyzed data, contributed to interpretation of the data, and reviewed/edited the  
45  
46 manuscript. Janne Pitkaniemi analyzed data, contributed to interpretation of the data, and  
47  
48 reviewed/edited the manuscript.  
49  
50  
51  
52  
53

### 54 **Data sharing**

55  
56 We have no additional unpublished data from the study.  
57  
58  
59  
60

## References:

- 1 Fowler MJ. Microvascular and macrovascular complications of diabetes. *Clin Diab* 2008;**26**:77-82.
- 2 Al Khaja KAJ, Sequeira RP, Damanhori AHH. Comparison of the quality of diabetes care in primary care diabetic clinics and general practice clinics. *Diab Res Clin Pract* 2005;**70**:174-82.
- 3 Mathers CD, Loncar D. Projections of global mortality and burden of disease from 2002 to 2030. *PLoS Med* 2006;**3**:e442. doi:10.1371/journal.pmed.0030442
- 4 Koski S. Diabetesbarometri 2010. [Diabetes Barometer]. Suomen Diabetesliitto ry. Kehitys Oy 2011.
- 5 Aiken LH, Clarke SP, Sloane DM. Hospital staffing, organization, and quality of care: Cross-national findings. *Nurs Outlook* 2002a;**50**:187-94.
- 6 Collins MM, O'Sullivan T, Harkins V, et al. Quality of life and quality of care in patients with diabetes experiencing different models of care. *Diab Care* 2009;**32**:603-5.
- 7 McLean G, Guthrie B, Sutton M. Differences in the quality of primary medical care services by remoteness from urban settlements. *Qual Saf Health Care* 2007;**16**:446-9.
- 8 Litaker D, Mion LC, Planavsky L, et al. Physician – nurse practitioner teams in chronic disease management: the impact on costs, clinical effectiveness, and patients' perception of care. *J Interprof Care* 2003;**17**:223-37.
- 9 Taylor CB, Miller NH, Reilly KR, et al. Evaluation of a nurse-care management system to improve outcomes in patients with complicated diabetes. *Diab Care* 2003;**26**:1058-63.
- 10 Linzer M, Baier Manwell L, Williams ES, et al. Working conditions in primary care: physician reactions and care quality. *Ann Intern Med* 2009;**151**:28-36.



- 1  
2  
3 11 Virtanen M, Oksanen T, Kawachi I, et al. Organizational justice in primary care health  
4 center and glycemic control among patients. *Med Care* 2012;**50**:831-5.  
5  
6  
7 12 Karasek RA. Job demands, job decision latitude, and mental strain: Implications for job  
8 redesign. *Adm Sci Q* 1979;**24**:285-308.  
9  
10  
11 13 Karasek RA, Theorell T. Healthy work. Stress, productivity, and the reconstruction of  
12 working life. New York: Basic Books 1990.  
13  
14  
15 14 Laamanen R, Simonsen-Rehn N, Suominen S, et al. Outsourcing primary health care  
16 services – How politicians explain the grounds for their decisions. *Health Policy* 2008;**88**:294-  
17 307.  
18  
19  
20  
21  
22 15 Teperi J, Porter ME, Vuorenkoski L, et al. The Finnish health care system: a value-based  
23 perspective. *Sitra Reports* 2009;**82**. Helsinki: Sitra.  
24  
25  
26  
27 16 Kivimäki M, Lawlor DA, Davey Smith G, et al. Socioeconomic position, co-occurrence of  
28 behaviour-related risk factors, and coronary heart disease: The Finnish Public Sector Study.  
29 *Am J Public Health* 2007; **97**:874-979.  
30  
31  
32  
33 17 Karasek RA. Job Content Questionnaire and User's Guide. Revision 1.1. Los Angeles:  
34 Department of Industrial and Systems Engineering. University of Southern Los Angeles 1985.  
35  
36  
37 18 Vahtera J, Kivimäki M, Pentti J, et al. Effect of change in the psychosocial work  
38 environment on sickness absence: a 7-year follow-up of initially healthy employees. *JECH*  
39 2000;**54**:484-93.  
40  
41  
42  
43 19 Kivimäki M, Vahtera J, Pentti J, et al. Factors underlying the effect of organisational  
44 downsizing on health of employees: longitudinal cohort study. *BMJ* 2000; **320**: 971-975.  
45  
46  
47  
48 20 Lehto A-M. Quality of working life and equity. Helsinki, Finland: Statistics Finland 1991.  
49  
50  
51 21 American Diabetes Association. Standards of medical care in diabetes - 2011. *Diab Care*  
52 2011;**34**(Suppl 1):P11-61.  
53  
54  
55  
56  
57  
58  
59  
60

1  
2  
3 22 Valle T, Tuomilehto J. Diabeetikkojen hoitotasapaino Suomessa vuosina 2000-2001.  
4 [Glycaemic control in patients with diabetes in 2000-2001]. DEHKO-reports 2004;1.  
5  
6  
7 Tampere: Suomen Diabetesliitto ry.

8  
9  
10 23 Virtanen M, Kivimäki M, Pentti J, et al. School neighborhood disadvantage as a predictor  
11 of long-term sick leave among teachers: Prospective cohort study. *Am J Epidemiol*  
12 2010;**171**:785-92.

13  
14  
15 24 Kim D, Masyn KE, Kawachi I, et al. Neighborhood socioeconomic status and behavioral  
16 pathways to risks of colon and rectal cancer in women. *Cancer* 2010;**116**:4187-96.

17  
18  
19 25 Diez Roux AV, Merkin SS, Arnett D, et al. Neighborhood of residence and incidence of  
20 coronary heart disease. *New Engl J Med* 2001;**345**:99-106.

21  
22  
23 26 Bakker AB, Demerouti E, Verbeke, W. Using the job demands-resources model to predict  
24 burnout and performance. *HRM* 2004;**43**:83-104.

25  
26  
27 27 Koponen AM, Laamanen R, Simonsen-Rehn N, et al. Psychosocial work environment and  
28 emotional exhaustion – Does a service provision model play a role? *Health Policy*,  
29 2010;**94**:111-19.

30  
31  
32 28 Maslach C, Schaufeli WB, Leiter MP. Job burnout. *Annu Rev Psychol* 2001;**52**:397-422.

33  
34  
35 29 Aiken LH, Clarke SP, Sloane DM, et al. Hospital nurse staffing and patient mortality,  
36 nurse burnout, and job dissatisfaction. *JAMA* 2002b;**288**:1987-93.

37  
38  
39 30 Klein J, Grosse Frie K, Blum K, et al. Burnout and perceived quality of care among  
40 German clinicians in surgery. *IJQHC* 2010;**22**:525-30.

41  
42  
43 31 Klein J, Grosse Frie K, Blum K, et al. Psychosocial stress at work and perceived quality of  
44 care among clinicians in surgery. *BMC Health Services Research* 2011;**11**:109.

45  
46  
47 32 Wallace JE, Lemaire JB, Ghali WA. Physician wellness: a missing quality indicator.  
48  
49  
50  
51  
52  
53  
54  
55  
56  
57  
58  
59  
60  
16  
*Lancet* 2009;**374**:1714-21.

1  
2  
3 33 Williams ES, Manwell LB, Konrad TR, et al. The relationship of organizational culture,  
4 stress, satisfaction, and burnout with physician-reported error and suboptimal patient care:  
5 Results from the MEMO study. *Health Care Manage Rev* 2007;**32**:203-212.  
6  
7

8  
9 34 Koponen A, Laamanen R, Simonsen-Rehn N, et al. Perusterveydenhuollon ja  
10 sosiaalitoimen henkilöstön työolot ja työuupumus neljässä kunnassa – Onko  
11 palvelutuotantomallilla väliä? [Psychosocial work environment and emotional exhaustion of  
12 primary health care and social sector personnel in four municipalities – Does a service  
13 provision model play a role?]. *Sosiaalilääketieteellinen aikakauslehti* 2007;**3**:163-75.  
14  
15

16  
17 35 Laaksonen M, Talala K, Martelin T, et al. Health behaviours as explanations for  
18 educational level differences in cardiovascular and all-cause mortality: a follow-up of 60000  
19 men and women over 23 years. *EJPH* 2008;**18**:38-43.  
20  
21

22  
23 36 MacKinnon DP, Krull JL, Lockwood CM. Equivalence of the mediation, confounding and  
24 suppression effect. *Prev Sci* 2000;**1**:173.  
25  
26

27  
28 37 Unwin N, Whiting D, Roglic G. Social determinants of diabetes and challenges of  
29 prevention. *The Lancet* 2010;**375**:2204-5.  
30  
31

32  
33 38 Bourbonnais R, Brisson C, Vinet A, et al. Effectiveness of a participative intervention on  
34 psychosocial work factors to prevent mental health problems in a hospital setting. *Occup*  
35 *Environ Med* 2006;**63**:335-42.  
36  
37

38  
39 39 Bourbonnais R, Brisson C, Vézina M. Long-term effects of an intervention on  
40 psychosocial work factors among healthcare professionals in a hospital setting. *Occup*  
41 *Environ Med* 2011;**68**:479-86.  
42  
43  
44  
45  
46  
47  
48  
49  
50  
51  
52  
53  
54  
55  
56  
57  
58  
59  
60

Table 1. Patient, organization and service area characteristics in primary care health centres (HCs) varying in job strain.

| Job strain in primary care health centre (HC)                                      |                   |                                             |                                          |                                         |                                              |         |
|------------------------------------------------------------------------------------|-------------------|---------------------------------------------|------------------------------------------|-----------------------------------------|----------------------------------------------|---------|
|                                                                                    | All HCs<br>(N=18) | Low strain<br>job HCs <sup>3</sup><br>(n=4) | Passive<br>job HCs <sup>4</sup><br>(n=5) | Active<br>job HCs <sup>5</sup><br>(n=5) | High strain<br>job HCs <sup>6</sup><br>(n=4) | p-value |
| <i>Patient characteristics</i>                                                     |                   |                                             |                                          |                                         |                                              |         |
| Percentage of men <sup>1</sup>                                                     | 51                | 50                                          | 48                                       | 54                                      | 52                                           | <.001   |
| Age (mean/SD) <sup>2</sup>                                                         | 67 (11.6)         | 67 (10.9)                                   | 68 (11.2)                                | 66 (11.2)                               | 65 (11.2)                                    | <.001   |
| HbA1c<br>(mean/SD) <sup>2</sup>                                                    | 7.1 (1.2)         | 7.1 (1.2)                                   | 7.1 (1.1)                                | 7.1 (1.1)                               | 7.1 (1.1)                                    | .349    |
| Patients with poor<br>glycaemic control<br>(HbA1c≥7%) (%) <sup>1</sup>             | 43                | 45                                          | 42                                       | 42                                      | 46                                           | .021    |
| N                                                                                  | 8975              | 1999                                        | 2862                                     | 2707                                    | 1407                                         |         |
| <i>Organization characteristics</i>                                                |                   |                                             |                                          |                                         |                                              |         |
| Temporary employees<br>(%) <sup>1</sup>                                            | 22                | 28                                          | 12                                       | 30                                      | 16                                           | <.001   |
| Staff sickness absence<br>days (mean/SD) <sup>2</sup>                              | 14 (5.3)          | 9 (4.3)                                     | 17 (2.3)                                 | 12 (5.4)                                | 16 (5.5)                                     | <.001   |
| <i>Socioeconomic composition of HC service area</i>                                |                   |                                             |                                          |                                         |                                              |         |
| Percentage of the lowest<br>educational level <sup>1</sup>                         | 27                | 29                                          | 26                                       | 25                                      | 27                                           | <.001   |
| Median income level in<br>the HC service area,<br>euros<br>(mean, SD) <sup>2</sup> | 17203<br>(2556)   | 15660<br>(3057)                             | 16097<br>(756)                           | 18951<br>(2166)                         | 18280<br>(2301)                              | <.001   |
| Unemployment rate<br>(mean, SD) <sup>2</sup>                                       | 7<br>(2.9)        | 7<br>(3.3)                                  | 10<br>(1.6)                              | 4<br>(0.8)                              | 6<br>(1.2)                                   | <.001   |

1)  $\chi^2$ -test

2) 1-way ANOVA

3) Low demands and high control

4) Low demands and low control

5) High demands and high control

6) High demands and low control

Table 2. Patient, organization and service area characteristics in primary care health centres (HCs) varying in supervisor support.

| Supervisor support in primary care health centre (HC)                         |                   |                             |                                  |                              |         |
|-------------------------------------------------------------------------------|-------------------|-----------------------------|----------------------------------|------------------------------|---------|
|                                                                               | All HCs<br>(N=18) | Low support<br>HCs<br>(n=6) | Moderate<br>support HCs<br>(n=6) | High<br>support HCs<br>(n=6) | p-value |
| <i>Patient characteristics</i>                                                |                   |                             |                                  |                              |         |
| Percentage of men <sup>1</sup>                                                | 51                | 48                          | 54                               | 52                           | <.001   |
| Age (mean/SD) <sup>2</sup>                                                    | 67 (11.2)         | 67 (11.3)                   | 66 (11.0)                        | 65 (11.6)                    | <.001   |
| HbA1c-value<br>(mean/SD) <sup>2</sup>                                         | 7.1 (1.2)         | 7.1 (1.3)                   | 7.1 (1.1)                        | 7.0 (1.1)                    | .082    |
| Patients with poor<br>glycaemic control<br>(HbA1c $\geq$ 7%) (%) <sup>1</sup> | 43                | 44                          | 44                               | 41                           | .076    |
| N                                                                             | 8975              | 3911                        | 3194                             | 1870                         |         |
| <i>Organization characteristics</i>                                           |                   |                             |                                  |                              |         |
| Temporary employees<br>(%) <sup>1</sup>                                       | 22                | 12                          | 31                               | 26                           | <.001   |
| Staff sickness absence<br>days (mean/SD) <sup>2</sup>                         | 14 (5.3)          | 15 (4.4)                    | 14 (4.5)                         | 10 (6.6)                     | <.001   |
| <i>Socioeconomic composition of HC service area</i>                           |                   |                             |                                  |                              |         |
| Percentage of the lowest<br>educational level <sup>1</sup>                    | 27                | 28                          | 26                               | 25                           | <.001   |
| Median income level,<br>euros (mean, SD) <sup>2</sup>                         | 17203<br>(2556)   | 15173<br>(1510)             | 18971<br>(2009)                  | 18429<br>(2055)              | <.001   |
| Unemployment rate<br>(mean/SD) <sup>2</sup>                                   | 7<br>(2.9)        | 10<br>(1.4)                 | 5<br>(1.4)                       | 5<br>(0.6)                   | <.001   |

1)  $\chi^2$ -test

2) 1-way ANOVA

Table 3. Level of perceived job strain among the health care personnel (doctors and nurses) as a predictor of poor glycaemic control indicator (HbA1c $\geq$ 7%) in patients with type 2 diabetes (N=8975) in primary care health centres (HCs, N=18).

| Job strain in the HC  | Unadjusted model    |         | Model I*            |         | Model II**          |         | Model III***        |         |
|-----------------------|---------------------|---------|---------------------|---------|---------------------|---------|---------------------|---------|
|                       | OR (95% CI)         | p-value |
| <i>Fixed effects</i>  |                     |         |                     |         |                     |         |                     |         |
| Low strain job        | 1.00                |         | 1.00                |         | 1.00                |         | 1.00                |         |
| Passive job           | 0.96<br>(0.72-1.27) | 0.752   | 0.96<br>(0.72-1.27) | 0.760   | 0.97<br>(0.70-1.36) | 0.871   | 1.08<br>(0.86-1.36) | 0.497   |
| Active job            | 0.89<br>(0.68-1.18) | 0.430   | 0.89<br>(0.67-1.19) | 0.438   | 0.91<br>(0.69-1.20) | 0.484   | 1.17<br>(0.96-1.43) | 0.114   |
| High strain job       | 1.08<br>(0.80-1.47) | 0.603   | 1.09<br>(0.80-1.48) | 0.586   | 1.10<br>(0.78-1.56) | 0.572   | 1.44<br>(1.12-1.86) | 0.004   |
| <i>Random effects</i> |                     |         |                     |         |                     |         |                     |         |
| HC variance           | 0.04                |         | 0.04                |         | 0.04                |         | 0.01                |         |
| (SE)                  | 0.05                |         | 0.05                |         | 0.04                |         | 0.02                |         |

Multilevel regression analysis

\*Adjusted for patient characteristics (sex and age)

\*\*Adjusted as model I + organization characteristics (the percentage of temporary employees and the mean rate of sickness absence days in the HC)

\*\*\* Adjusted as model II + HC service area characteristics (educational level of the residents, median income and unemployment rate)

Table 4. Level of perceived job strain among the health care personnel (doctors and nurses) as a predictor of poor glycaemic control indicator (HbA1c $\geq$ 8%) in patients with type 2 diabetes (N=8975) in primary care health centres (HCs, N=18).

| Job strain in the HC  | Unadjusted model    |         | Model I*            |         | Model II**          |         | Model III***        |         |
|-----------------------|---------------------|---------|---------------------|---------|---------------------|---------|---------------------|---------|
|                       | OR (95% CI)         | p-value |
| <i>Fixed effects</i>  |                     |         |                     |         |                     |         |                     |         |
| Low strain job        | 1.00                |         | 1.00                |         | 1.00                |         | 1.00                |         |
| Passive job           | 1.06<br>(0.72-1.58) | 0.764   | 1.07<br>(0.73-1.57) | 0.742   | 1.08<br>(0.71-1.64) | 0.725   | 1.16<br>(0.89-1.51) | 0.287   |
| Active job            | 0.84<br>(0.57-1.25) | 0.394   | 0.83<br>(0.57-1.22) | 0.341   | 0.86<br>(0.60-1.23) | 0.408   | 1.23<br>(0.96-1.56) | 0.101   |
| High strain job       | 1.12<br>(0.73-1.71) | 0.609   | 1.09<br>(0.72-1.65) | 0.679   | 1.09<br>(0.71-1.69) | 0.684   | 1.57<br>(1.17-2.12) | 0.003   |
| <i>Random effects</i> |                     |         |                     |         |                     |         |                     |         |
| HC variance (SE)      | 0.07<br>0.06        |         | 0.07<br>0.06        |         | 0.06<br>0.06        |         | 0.01<br>0.02        |         |

Multilevel regression analysis

\*Adjusted for patient characteristics (sex and age)

\*\*Adjusted as model I + organization characteristics (the percentage of temporary employees and the mean rate of sickness absence days in the HC)

\*\*\* Adjusted as model II + HC service area characteristics (educational level of the residents, median income and unemployment rate)

Table 5. Level of perceived supervisor support among the health care personnel (doctors and nurses) as a predictor of poor glycaemic control indicator (HbA1c $\geq$ 7%) in patients with type 2 diabetes (N=8975) in primary care health centres (HCs, N=18).

| Supervisor support in the HCs | Unadjusted model |         | Model I*         |         | Model II**       |         | Model III***     |         |
|-------------------------------|------------------|---------|------------------|---------|------------------|---------|------------------|---------|
|                               | OR (95% CI)      | p-value |
| <i>Fixed effects</i>          |                  |         |                  |         |                  |         |                  |         |
| <b>High support</b>           | 1.00             |         | 1.00             |         | 1.00             |         | 1.00             |         |
| <b>Medium support</b>         | 1.11 (0.86-1.43) | .415    | 1.11 (0.86-1.43) | .441    | 1.17 (0.90-1.53) | .249    | 1.14 (0.95-1.36) | .157    |
| <b>Low support</b>            | 1.13 (0.88-1.45) | .334    | 1.13 (0.88-1.45) | .353    | 1.10 (0.84-1.44) | .507    | 0.87 (0.65-1.16) | .344    |
| <i>Random effects</i>         |                  |         |                  |         |                  |         |                  |         |
| <b>HC variance</b>            | 0.04             |         | 0.04             |         | 0.03             |         | 0.01             |         |
| <b>(SE)</b>                   | 0.05             |         | 0.05             |         | 0.04             |         | 0.02             |         |

Multilevel regression analysis

\*Adjusted for patient characteristics (sex and age)

\*\*Adjusted as model I + organization characteristics (the percentage of temporary employees and the mean rate of sickness absence days in the HC)

\*\*\* Adjusted as model II + HC service area characteristics (educational level of the residents, median income and unemployment rate)



1  
2  
3 **Job strain and supervisor support in primary care health centres and**  
4  
5 **glycaemic control among patients with type 2 diabetes – a cross-sectional**  
6  
7 **study**  
8  
9

10  
11  
12  
13 **Abstract**  
14

15  
16 **Objectives** This study investigates associations between health care personnel's perceived job  
17 strain, supervisor support and the outcome of care in terms of glycaemic control among patients  
18 with type 2 diabetes.  
19  
20

21  
22 **Design** A cross-sectional study from 2006.  
23

24  
25 **Setting** Eighteen primary care health centres (HCs) from five municipalities in Finland.  
26

27  
28 **Participants** Aggregated survey data on perceived job strain and supervisor support from health  
29 care personnel (doctors, n=122, mean age 45.5 years, nurses, n=300, mean age 47.1 years) were  
30 combined with registered data (Electronic Medical Records) from 8975 patients (51% men, mean  
31 age 67 years) with type 2 diabetes.  
32  
33  
34

35  
36 **Outcome measure** Poor glycaemic control (HbA1c  $\geq 7\%$ ).  
37

38  
39 **Results** The mean HbA1c-level among the patients with type 2 diabetes was 7.1 (SD 1.2, range 4.5-  
40 19.1), and 43% had poor glycaemic control (HbA1c  $\geq 7\%$ ). Multilevel logistic regression analyses  
41 adjusted for patient's age and sex, and HC- and HC service area-level characteristics showed that  
42 patients' HbA1c-levels were less optimal in high strain HCs than in low strain HCs (OR 1.44, 95%,  
43 CI 1.12-1.86). Supervisor support in HCs was not associated with the outcome of care.  
44  
45  
46  
47

48  
49 **Conclusion** The level of job strain among the health care personnel may play a role in achieving  
50 good glycaemic control among patients with type 2 diabetes.  
51  
52  
53  
54  
55  
56  
57  
58  
59  
60

## ARTICLE SUMMARY

### Article focus

- This paper focuses on the association between job strain and supervisor support of health care personnel and the outcome of care among patients with type 2 diabetes.

### Key message

- HbA1c-levels were less optimal in primary care health centres where health care personnel's perceived job strain was high compared with primary care health centres where perceived job strain was low.

### Strengths and limitations of this study

- Previous studies suggest that the organization of care can affect the quality and the outcome of care in diabetes. This study showed that job strain of health care personnel may be one key factor associated with glycaemic control among patients with type 2 diabetes.
- We did not have information on patients' health behaviour, medication and comorbidity associated with type 2 diabetes.

## INTRODUCTION

Diabetes mellitus is an important and increasing public health problem worldwide<sup>1 2 3</sup>. In Finland, about 10% of the population has diabetes of which a majority is of type 2<sup>4</sup>. Primary health care faces a serious challenge to provide high quality care in order to decrease complications, mortality and costs caused by this public health burden.

Health care organizations may differ in the quality of care<sup>5</sup>. However, we know only little about organizational aspects that promote good care of diabetes. One aspect may relate to the organization of care. Collins et al.<sup>6</sup> showed that compliance to diabetes care was better in structured general practitioner (GP) care than in traditional hospital care or in hospital/GP shared care. McLean et al.<sup>7</sup> found that the intermediate outcome target in cholesterol measurement of diabetic patients was achieved more often in urban practices than in very remote rural practices. Medical outcomes of care in type 2 diabetes have been shown to be better in physician-nurse practitioner teams than in care provided by a physician alone<sup>8 9</sup>. Linzer et al.<sup>10</sup> found that good organizational culture with high values alignment with leadership and work control was associated with higher-quality care for diabetic patients. In the study by Virtanen et al.<sup>11</sup> perception of procedural justice among staff was associated with more optimal glycaemic control among patients.

More research on the associations between organizational factors and the quality of care, especially the outcome of care, in diabetes is needed. Based on the theory of Karasek<sup>12</sup> and Karasek & Theorell<sup>13</sup> equilibrium between personnel's job demands and job control as well as social support at work might be important organizational factors associated with the quality of care. Active work with high demands and high control most likely promotes high quality care<sup>13</sup>. High demands give challenges, motivation and promote learning but combined with high control high demands do not cause negative psychological strain. Instead, high-strain work with high demands and low control

1  
2  
3 exhausts personnel and decreases productivity. Low-strain work with high control and low demands  
4  
5 may not offer optimal challenges, and passive work with low demands and low control may lead to  
6  
7 apathy and loss of learned skills and abilities. Besides an optimal balance between job demands and  
8  
9 job control, also social support at work is likely to promote good health, learning and productivity<sup>13</sup>.  
10  
11 Social support can, for example, buffer the negative effect of psychological stressors on employee  
12  
13 health, and co-workers and supervisors are valuable sources of information and expertise.  
14  
15  
16  
17

## 18 AIM AND HYPOTHESES OF THE STUDY

19  
20 The aim of this study was to investigate associations between health care personnel's perceived job  
21  
22 strain, supervisor support and the outcome of care in terms of glycaemic control among patients  
23  
24 with type 2 diabetes. We hypothesize that glycaemic control is best achieved in primary care health  
25  
26 centres where health care personnel **have** possibility to active work and high supervisor support.  
27  
28  
29  
30  
31

## 32 METHODS

### 33 Study context

34  
35 The study was conducted in **18 primary care health centres (HCs)** in five municipalities in Finland.  
36  
37 Municipalities differed in size (about 7500-200000 inhabitants) and the number of **HCs** in each  
38  
39 municipality (1-10). In Finland, municipalities are responsible for organizing primary health care  
40  
41 services and cover the costs together with the state. Primary health care services are provided by  
42  
43 HCs that offer a wide range of care services including doctor and nurse services<sup>14</sup> and have a central  
44  
45 role in disease management for major chronic conditions like diabetes<sup>15</sup>. Three of the five  
46  
47 municipalities had a family doctor system in their HCs. **The two other municipalities had the**  
48  
49 **traditional model in which appointments can be made with any doctor in the HC.** All HCs had a  
50  
51 diabetes nurse. One city had also a clinic specialized for prevention and care of chronic conditions.  
52  
53 Patients from HCs could be referred there for additional advice and care.  
54  
55  
56  
57  
58  
59  
60

## Data collection and participants

The data to this cross-sectional study were gathered in 2006. Information on job strain and supervisor support in 18 HCs is based on responses of doctors (n=122, mean age 45.5 years) and nurses (n=300, mean age 47.1 years), who took part in the Finnish Public Sector Study<sup>16</sup>, a voluntary-basis survey addressed to local government personnel of the participating towns (response rate 79%). Information on sex, age, the postal zip code of area of residence and glycaemic control (HbA1c-values) of patients with the diagnosis of type 2 diabetes (N=8975, 51% men, mean age 67 years, SD 11, range 16-106 years) was collected from HC registers (Electronic Medical Records) by the contact persons who worked in HCs. They delivered anonymous data to researchers. Aggregated variables indicating the levels of job strain and social support (based on survey responses of doctors and nurses) were created for each HC and linked to patient data. Thus, each patient has information in her/his individual data on job strain and supervisor support in the HC that had responsibility of her/his diabetes care.

Because all patient data included only a very limited set of variables without any identification code it was totally anonymous. Thus, no informed consent was needed. Instead, a written approval based on a brief description of the study was applied for and granted by all chief physicians responsible for the organization and administration of primary care in the involved municipalities.

## Measures

### Job strain and supervisor support

Aggregated measure of job strain was derived from the responses of doctors and nurses (n=422) to questions measuring job demands (5 items) and job control (9 items) derived from the Job Content Questionnaire<sup>17</sup>. Aggregated measure of social support from the supervisor<sup>18 19</sup> (4 items) was

1  
2  
3 derived from a standard survey instrument of Statistics Finland<sup>20</sup>. A 5-point Likert-type response  
4  
5 format ranging from 1 (totally agree) to 5 (totally disagree) was used for all items. A mean score for  
6  
7 the constructs was computed and the individual scores were then used to measure aggregated scores  
8  
9 of job strain and supervisor support for each work unit (HC) based on the identification of each  
10  
11 participant's work unit obtained from employers' administrative records.  
12  
13

14  
15  
16 To create a job strain indicator for each HC, aggregated demands and control were split on the  
17  
18 median and combined to four categories: low strain jobs (low demands combined with high control,  
19  
20 4 HCs), active jobs (high demands combined with high control, 5 HCs), passive jobs (low demands  
21  
22 combined with low control, 5 HCs), and high strain jobs (high demands combined with low control,  
23  
24 4 HCs)<sup>12</sup>. To create a supervisor support indicator for each HC, aggregated supervisor support was  
25  
26 split into three equal groups indicating low, medium and high support (6 HCs in each group).  
27  
28  
29

30  
31  
32 Job strain and supervisor support indicators for each HC were created based on the responses of  
33  
34 doctors and nurses because doctors and nurses work quite independently in HCs and these two  
35  
36 professional groups both affect the quality of care. Aggregated job demands of doctors were higher  
37  
38 (mean 3.9, range 3.0-4.4) than job demands of nurses (mean 3.5, range 2.8-4.3). Aggregated job  
39  
40 control of doctors was also somewhat higher (mean 3.9, range 3.7-4.3) than job control of nurses  
41  
42 (mean 3.8, range 3.6-4.2). In aggregated supervisor support there was no difference between doctors  
43  
44 (mean 3.6, range 2.5-5.0) and nurses (3.6, range 2.9-4.5).  
45  
46  
47  
48

#### 49 Glycaemic control

50  
51 Glycaemic control was determined by 1 year's measurements of glycated haemoglobin (HbA1c)  
52  
53 value. In case of several control measurements the mean HbA1c-value was calculated (mean  
54  
55 number of measurements was 2.1, range 1-15). Of the patients, 35% had one measurement. Based  
56  
57  
58  
59  
60

1  
2  
3 on the standards of medical care in diabetes<sup>21 22</sup> we used a value under 7% to indicate good and a  
4  
5 value of 7 or higher to indicate poor glycaemic control. For an additional secondary analysis we  
6  
7 used HbA1c-value of 8% as a cut point.  
8  
9

### 10 11 **Background variables**

12  
13  
14 *Patient characteristics:* Information on age, sex, and the postal zip code of area of residence of each  
15  
16 patient was obtained from the HC's registers.  
17

18  
19 *HC characteristics:* The proportion of temporary employees and the mean rate of sickness absence  
20  
21 days in the work unit in 2006 were drawn from employers' registers<sup>23</sup>.  
22

23  
24 *HC service area characteristics:* By using the patient postal zip codes and data obtained from  
25  
26 Statistics Finland we formulated the average educational level (percentage of adults aged >18 years  
27  
28 whose highest education level is elementary school), the median income and the unemployment rate  
29  
30 (unemployed persons belonging to the workforce divided by total workforce) of the residents in the  
31  
32 HC catchment area, that is, the population-weighted means for residents in the specific areas that  
33  
34 each HC served. The mean for each variable for each HC was calculated and linked to individual  
35  
36 data on each patient. Educational level, income and unemployment rate are standard variables to  
37  
38 characterize areal disadvantage and deprivation<sup>24 25</sup>.  
39  
40  
41  
42

### 43 **Statistical analysis**

44  
45 The statistical data analysis was carried out within individual patient data (N=8975) with HC  
46  
47 characteristics on an aggregated level. Descriptive statistics were estimated and the baseline  
48  
49 associations between independent variables, covariates and glycaemic control were tested with  
50  
51 Pearson chi<sup>2</sup>-tests or one-way analysis of variance depending on the measurement scale of the  
52  
53 variable of interest. Because the patients were nested within the 18 HC units, we used a two-level  
54  
55 modelling to account the data structure with job strain (or supervisor support) at the second level  
56  
57  
58  
59  
60

1  
2  
3 and the outcome – patient-level glycaemic control – at the first level. We fitted five models using  
4  
5 the multilevel logistic regression analysis. The first model, an empty model including only the  
6  
7 random effect variable, was used to examine the clustering of the outcome between the 18 HCs.  
8  
9 Then, we added job strain (or supervisor support) to examine its associations with the outcome.  
10  
11 Next, we added patient-level confounders, after that HC characteristics and finally, variables  
12  
13 describing socioeconomic composition of the HC service area (unadjusted model, model I, II and  
14  
15 III). Because we used register data combined with aggregated variables describing HCs and HC  
16  
17 catchment areas, there were only a few missing cases, and they were not included in the analyses.  
18  
19 Statistical analyses were performed using SPSS version 19.0 and R-program, version 2.13.0.  
20  
21  
22  
23  
24

## 25 RESULTS

26  
27 Tables 1-2 show baseline associations between independent variables, covariates and  
28  
29 glycaemic control. The mean HbA1c level of patients was 7.1 (SD 1.2, range 4.5-19.1,  
30  
31 Q1=6.3, median 6.8, Q3=7.6), and 43% had poor glycaemic control ( $\geq 7\%$ ). HCs did not differ  
32  
33 in the mean HbA1c-levels but the percentage of poor glycaemic control was highest in high  
34  
35 strain HCs.  
36  
37  
38  
39

40  
41 The mean percentage of temporary employees in HCs was 22% and the average amount of  
42  
43 sickness absence days was 14 days. The socioeconomic characteristics of the HC service  
44  
45 areas were as follows: the mean proportion of residents in the patients' neighbourhood with  
46  
47 only basic education was 27%, the median yearly income was 17203 euros, and the mean  
48  
49 unemployment rate was 7%. (Table 1). The mean rates of job control, job demands and  
50  
51 supervisor support in the HCs were 3.9, 3.6 and 3.6, respectively.  
52  
53  
54  
55

56 [Insert tables 1-2 somewhere here]  
57  
58  
59  
60



1  
2  
3  
4  
5 Tables 3-4 show that after adjustment for all covariates (model III) glycaemic control among  
6  
7 patients was less optimal in HCs where care personnel's perceived job strain was high  
8  
9 compared with HCs where job strain was low. Active and passive work HCs did not differ  
10  
11 statistically significantly from low strain HCs in the outcome of care. Also, supervisor support  
12  
13 was not associated with patients' glycaemic control (table 5).  
14

15  
16 [Insert tables 3-5 somewhere here]  
17  
18  
19

## 20 21 **DISCUSSION**

22  
23 This study showed that perceived job strain of health care personnel may be associated with  
24  
25 the outcome of diabetes care. Glycaemic control among type 2 diabetes patients was less  
26  
27 optimal in high strain HCs than in low strain HCs. Supervisor support was not associated with  
28  
29 the outcome of care.  
30

31  
32  
33 Several studies have found strong associations between experienced work load and burnout,  
34  
35 particularly its exhaustion dimension<sup>26 27 28</sup>. Emotional exhaustion is further associated with  
36  
37 low job performance shown in job withdrawal, deterioration of productivity and  
38  
39 effectiveness<sup>28</sup>, and the outcome of care<sup>5 29</sup>. Recent studies on physicians show that their  
40  
41 experienced job strain, stress and burnout are associated with increased risk of suboptimal  
42  
43 patient care and likelihood of making errors<sup>30-33</sup>. Exhausted employees are not effective,  
44  
45 accurate or innovative at work<sup>13</sup>. Instead, a favourable psychosocial work environment may  
46  
47 enhance employee well-being and motivate health care personnel to invent new working  
48  
49 methods and strengthen patients' motivation to self-care.  
50  
51  
52  
53  
54  
55  
56  
57  
58  
59  
60

1  
2  
3 However, patients' glycaemic control was not best in active jobs HCs as we predicted based  
4 on the job strain model<sup>13</sup>. This result is in line with the results of the study on clinicians in  
5 surgery by Klein et al.<sup>31</sup> They found that clinicians with active job reported suboptimal quality  
6 of care more often than clinicians with low-strain job. It is possible that active work  
7 assumption does not fit well in the health care sector. Active jobs give more challenges than  
8 low strain jobs or passive jobs but the motivational potential of higher demands of active jobs  
9 may be lost if demands are so high that they overwhelm health care personnel's capacities. In  
10 that case high control or other job resources may have only limited capability of buffering the  
11 undesired impact of high job demands<sup>26 34</sup>. Contrary to our prediction, social support from  
12 supervisor was not associated with the outcome of care. The fact that doctors and nurses in the  
13 Finnish HCs work quite independently is a potential explanation for this. **Doctors and nurses  
14 consult patients alone in separate appointments. Therefore, supervisor support may not play a  
15 great role in daily appointments with patients and the outcome of care.**

16  
17  
18  
19  
20  
21  
22  
23  
24  
25  
26  
27  
28  
29  
30  
31  
32  
33  
34 Register data give reliable care results but also has limitations. It does not give information on  
35 patients' socioeconomic status, such as educational level that is known to be strongly related  
36 with health behaviour, many unhealthy behaviours like smoking, poor dietary habits and  
37 physical inactivity being more prevalent in lower socioeconomic groups<sup>35</sup>. Healthy lifestyle  
38 again is the key factor in management of diabetes<sup>21</sup>. However, we were able to use  
39 disadvantage of the patient's residential area as a proxy for individual socioeconomic  
40 position. Indeed, the effect of job strain on glycaemic control emerged after adjustment of  
41 educational level, income and unemployment rate in the HC catchment area. This result points  
42 to suppression, a situation in which the magnitude of the relationship between an independent  
43 variable and a dependent variable becomes larger when a third variable (or multiple variables)  
44 is included to the analysis<sup>36</sup>

1  
2  
3  
4  
5 This was a cross-sectional study and no causal inferences of the associations between  
6 independent and dependent variables can be made. Another limitation was that we did not  
7 have information on patients' medication and comorbidity associated with type 2 diabetes<sup>37</sup>.  
8  
9 Neither did we have information on other aspects of the quality of care, such as numbers of  
10 doctors or nurses per inhabitants in the HC service area indicating the sufficiency of staff.  
11  
12 This is an important question to be further studied. However, job strain can be seen as one  
13 indicator of sufficiency of staff.  
14  
15  
16  
17  
18  
19

20  
21  
22 Further, we did not have access to exact information on where the principal care responsibility  
23 of the patients was. In spite of the fact that the patients had HbA1c-values measured via the  
24 HC it is possible that some of them, at least the younger ones, had also visited separate private  
25 or specialized public occupational health care units. In these cases, the psychosocial work  
26 environment of these units is more crucial for the outcome of care. However, the majority of  
27 the patients in the data were over 64 years old with many visits to the HC during 2006. Thus,  
28 it is unlikely that their main care responsibility would have been somewhere else. Also, the  
29 municipalities now studied, did not systematically differ in availability of care from  
30 occupational health care units.  
31  
32  
33  
34  
35  
36  
37  
38  
39  
40  
41  
42  
43  
44

45 This and previous studies suggest that the organization of care is associated with the quality and the  
46 outcome of care<sup>5 11 31</sup>. However, research evidence is still limited. **Further studies including all**  
47 **relevant confounding factors are needed. Some of those factors may be equally or more strongly**  
48 **associated with patients' glycaemic control than the organization of care. In addition, follow-up**  
49 **studies investigating the effect of changes in the psychosocial work environment, for example in job**  
50 **strain, of health care personnel on change in glycaemic control of patients with type 2 diabetes, are**  
51  
52  
53  
54  
55  
56  
57  
58  
59  
60

1  
2  
3 needed as well as interventions aiming at improving psychosocial work environment in health care.  
4  
5 The studies of Bourbonnais et al.<sup>38 39</sup> showed that such interventions may have positive effect on the  
6  
7 psychosocial work environment and mental health of health care personnel. Monitoring HbA1c-  
8  
9 values might be a useful tool in strategic leaderships of HCs because maintaining good **glycaemic**  
10  
11 control is essential in order to prevent micro- and macrovascular complications of diabetes and  
12  
13 costs caused by these chronic diseases related to type 2 diabetes<sup>1</sup>.  
14  
15  
16  
17  
18

### 19 **Funding statement**

20  
21 The work was supported by the Academy of Finland (The Finnish public sector study, projects  
22  
23 1129262, 129262) and the participating organizations.  
24  
25

### 26 **Competing Interest**

27  
28 None to declare  
29  
30  
31

### 32 **Contributorship statement**

33  
34 Anne Koponen, the guarantor, formulated the initial hypotheses, designed the study, analyzed and  
35  
36 interpreted data, and wrote the manuscript. Jussi Vahtera, Sakari Suominen, Marianna Virtanen and  
37  
38 Mika Kivimäki formulated the initial hypotheses, designed the study, contributed to interpretation  
39  
40 of the data, and reviewed/edited the manuscript. Nina Simonsen-Rehn designed the study,  
41  
42 contributed to interpretation of the data, and reviewed/edited the manuscript. Jaana Pentti designed  
43  
44 the study, analyzed data, contributed to interpretation of the data, and reviewed/edited the  
45  
46 manuscript. Janne Pitkaniemi analyzed data, contributed to interpretation of the data, and  
47  
48 reviewed/edited the manuscript.  
49  
50  
51  
52  
53  
54  
55  
56  
57  
58  
59  
60

## References:

- 1 Fowler MJ. Microvascular and macrovascular complications of diabetes. *Clin Diab* 2008;**26**:77-82.
- 2 Al Khaja KAJ, Sequeira RP, Damanhori AHH. Comparison of the quality of diabetes care in primary care diabetic clinics and general practice clinics. *Diab Res Clin Pract* 2005;**70**:174-82.
- 3 Mathers CD, Loncar D. Projections of global mortality and burden of disease from 2002 to 2030. *PLoS Med* 2006;**3**:e442. doi:10.1371/journal.pmed.0030442
- 4 Koski S. Diabetesbarometri 2010. [Diabetes Barometer]. Suomen Diabetesliitto ry. Kehitys Oy 2011.
- 5 Aiken LH, Clarke SP, Sloane DM. Hospital staffing, organization, and quality of care: Cross-national findings. *Nurs Outlook* 2002a;**50**:187-94.
- 6 Collins MM, O'Sullivan T, Harkins V, Perry IJ. Quality of life and quality of care in patients with diabetes experiencing different models of care. *Diab Care* 2009;**32**:603-5.
- 7 McLean G, Guthrie B, Sutton M. Differences in the quality of primary medical care services by remoteness from urban settlements. *Qual Saf Health Care* 2007;**16**:446-9.
- 8 Litaker D, Mion LC, Planavsky L, et al. Physician – nurse practitioner teams in chronic disease management: the impact on costs, clinical effectiveness, and patients' perception of care. *J Interprof Care* 2003;**17**:223-37.
- 9 Taylor CB, Miller NH, Reilly KR, et al. Evaluation of a nurse-care management system to improve outcomes in patients with complicated diabetes. *Diab Care* 2003;**26**:1058-63.
- 10 Linzer M, Baier Manwell L, Williams ES, et al. Working conditions in primary care: physician reactions and care quality. *Ann Intern Med* 2009;**151**:28-36.

- 1  
2  
3 11 Virtanen M, Oksanen T, Kawachi I, et al. Organizational justice in primary care health  
4 center and glycemic control among patients. *Med Care* 2012;**50**:831-5.  
5  
6  
7 12 Karasek RA. Job demands, job decision latitude, and mental strain: Implications for job  
8 redesign. *Adm Sci Q* 1979;**24**:285-308.  
9  
10  
11 13 Karasek RA, Theorell T. Healthy work. Stress, productivity, and the reconstruction of  
12 working life. New York: Basic Books 1990.  
13  
14  
15 14 Laamanen R, Simonsen-Rehn N, Suominen S, et al. Outsourcing primary health care  
16 services – How politicians explain the grounds for their decisions. *Health Policy* 2008;**88**:294-  
17 307.  
18  
19  
20  
21  
22 15 Teperi J, Porter ME, Vuorenkoski L, Baron JF. The Finnish health care system: a value-  
23 based perspective. *Sitra Reports* 2009;**82**. Helsinki: Sitra.  
24  
25  
26  
27 16 Kivimäki M, Lawlor DA, Davey Smith G, Kouvonen A, Virtanen M, Elovainio M,  
28 Vahtera J. Socioeconomic position, co-occurrence of behaviour-related risk factors, and  
29 coronary heart disease: The Finnish Public Sector Study. *Am J Public Health* 2007; **97**:874-  
30 979.  
31  
32  
33  
34  
35  
36 17 Karasek RA. Job Content Questionnaire and User's Guide. Revision 1.1. Los Angeles:  
37 Department of Industrial and Systems Engineering. University of Southern Los Angeles 1985.  
38  
39  
40 18 Vahtera J, Kivimäki M, Pentti J, Theorell T. Effect of change in the psychosocial work  
41 environment on sickness absence: a 7-year follow-up of initially healthy employees. *JECH*  
42 2000;**54**:484-93.  
43  
44  
45  
46  
47 19 Kivimäki M, Vahtera J, Pentti J, Ferrie J. Factors underlying the effect of organisational  
48 downsizing on health of employees: longitudinal cohort study. *BMJ* 2000; **320**: 971-975.  
49  
50  
51  
52 20 Lehto A-M. Quality of working life and equity. Helsinki, Finland: Statistics Finland 1991.  
53  
54  
55 21 American Diabetes Association. Standards of medical care in diabetes - 2011. *Diab Care*  
56 2011;**34**(Suppl 1):P11-61.  
57  
58  
59  
60

1  
2  
3 22 Valle T, Tuomilehto J. Diabeetikkojen hoitotasapaino Suomessa vuosina 2000-2001.  
4 [Glycaemic control in patients with diabetes in 2000-2001]. DEHKO-reports 2004;1.  
5  
6  
7 Tampere: Suomen Diabetesliitto ry.  
8

9  
10 23 Virtanen M, Kivimäki M, Pentti J, et al. School neighborhood disadvantage as a predictor  
11 of long-term sick leave among teachers: Prospective cohort study. Am J Epidemiol  
12 2010;**171**:785-92.  
13

14  
15 24 Kim D, Masyn KE, Kawachi I, et al. Neighborhood socioeconomic status and behavioral  
16 pathways to risks of colon and rectal cancer in women. Cancer 2010;**116**:4187-96.  
17  
18

19  
20 25 Diez Roux AV, Merkin SS, Arnett D, et al. Neighborhood of residence and incidence of  
21 coronary heart disease. New Engl J Med 2001;**345**:99-106.  
22  
23

24  
25 26 Bakker AB, Demerouti E, Verbeke, W. Using the job demands-resources model to predict  
26 burnout and performance. HRM 2004;**43**:83-104.  
27  
28

29  
30 27 Koponen AM, Laamanen R, Simonsen-Rehn N, et al. Psychosocial work environment and  
31 emotional exhaustion – Does a service provision model play a role? Health Policy,  
32 2010;**94**:111-19.  
33  
34

35  
36 28 Maslach C, Schaufeli WB, Leiter MP. Job burnout. Annu Rev Psychol 2001;**52**:397-422.  
37

38  
39 29 Aiken LH, Clarke SP, Sloane DM, et al. Hospital nurse staffing and patient mortality,  
40 nurse burnout, and job dissatisfaction. JAMA 2002b;**288**:1987-93.  
41  
42

43  
44 30 Klein J, Grosse Frie K, Blum K, et al. Burnout and perceived quality of care among  
45 German clinicians in surgery. IJQHC 2010;**22**:525-30.  
46

47  
48 31 Klein J, Grosse Frie K, Blum K, et al. Psychosocial stress at work and perceived quality of  
49 care among clinicians in surgery. BMC Health Services Research 2011;**11**:109.  
50

51  
52 32 Wallace JE, Lemaire JB, Ghali WA. Physician wellness: a missing quality indicator.  
53 Lancet 2009;**374**:1714-21.  
54  
55

1  
2  
3 33 Williams ES, Manwell LB, Konrad TR, et al. The relationship of organizational culture,  
4 stress, satisfaction, and burnout with physician-reported error and suboptimal patient care:  
5 Results from the MEMO study. *Health Care Manage Rev* 2007;**32**:203-212.  
6  
7

8  
9  
10 34 Koponen A, Laamanen R, Simonsen-Rehn N, Suominen S. Perusterveydenhuollon ja  
11 sosiaalitoimen henkilöstön työolot ja työuupumus neljässä kunnassa – Onko  
12 palvelutuotantomallilla väliä? [Psychosocial work environment and emotional exhaustion of  
13 primary health care and social sector personnel in four municipalities – Does a service  
14 provision model play a role?]. *Sosiaalilääketieteellinen aikakauslehti* 2007;**3**:163-75.  
15  
16

17  
18  
19 35 Laaksonen M, Talala K, Martelin T, et al. Health behaviours as explanations for  
20 educational level differences in cardiovascular and all-cause mortality: a follow-up of 60000  
21 men and women over 23 years. *EJPH* 2008;**18**:38-43.  
22  
23

24  
25  
26 36 MacKinnon DP, Krull JL, Lockwood CM. Equivalence of the mediation, confounding and  
27 suppression effect. *Prev Sci* 2000;**1**:173.  
28  
29

30  
31  
32 37 Unwin N, Whiting D, Roglic G. Social determinants of diabetes and challenges of  
33 prevention. *The Lancet* 2010;**375**:2204-5.  
34  
35

36  
37 38 Bourbonnais R, Brisson C, Vinet A, et al. Effectiveness of a participative intervention on  
38 psychosocial work factors to prevent mental health problems in a hospital setting. *Occup*  
39  
40  
41  
42 *Environ Med* 2006;**63**:335-42.  
43

44 39 Bourbonnais R, Brisson C, Vézina M. Long-term effects of an intervention on  
45 psychosocial work factors among healthcare professionals in a hospital setting. *Occup*  
46  
47  
48  
49 *Environ Med* 2011;**68**:479-86.  
50



Table 1. Patient, organization and service area characteristics in primary care health centres (HCs) varying in job strain.

| Job strain in primary care health centre (HC)                                      |                   |                                             |                                          |                                         |                                              |         |
|------------------------------------------------------------------------------------|-------------------|---------------------------------------------|------------------------------------------|-----------------------------------------|----------------------------------------------|---------|
|                                                                                    | All HCs<br>(N=18) | Low strain<br>job HCs <sup>3</sup><br>(n=4) | Passive<br>job HCs <sup>4</sup><br>(n=5) | Active<br>job HCs <sup>5</sup><br>(n=5) | High strain<br>job HCs <sup>6</sup><br>(n=4) | p-value |
| <b>Patient characteristics</b>                                                     |                   |                                             |                                          |                                         |                                              |         |
| Percentage of men <sup>1</sup>                                                     | 51                | 50                                          | 48                                       | 54                                      | 52                                           | <.001   |
| Age (mean/SD) <sup>2</sup>                                                         | 67 (11.6)         | 67 (10.9)                                   | 68 (11.2)                                | 66 (11.2)                               | 65 (11.2)                                    | <.001   |
| HbA1c<br>(mean/SD) <sup>2</sup>                                                    | 7.1 (1.2)         | 7.1 (1.2)                                   | 7.1 (1.1)                                | 7.1 (1.1)                               | 7.1 (1.1)                                    | .349    |
| Patients with poor<br>glycaemic control<br>(HbA1c≥7%) (%) <sup>1</sup>             | 43                | 45                                          | 42                                       | 42                                      | 46                                           | .021    |
| N                                                                                  | 8975              | 1999                                        | 2862                                     | 2707                                    | 1407                                         |         |
| <b>Organization characteristics</b>                                                |                   |                                             |                                          |                                         |                                              |         |
| Temporary employees<br>(%) <sup>1</sup>                                            | 22                | 28                                          | 12                                       | 30                                      | 16                                           | <.001   |
| Staff sickness absence<br>days (mean/SD) <sup>2</sup>                              | 14 (5.3)          | 9 (4.3)                                     | 17 (2.3)                                 | 12 (5.4)                                | 16 (5.5)                                     | <.001   |
| <b>Socioeconomic composition of HC service area</b>                                |                   |                                             |                                          |                                         |                                              |         |
| Percentage of the lowest<br>educational level <sup>1</sup>                         | 27                | 29                                          | 26                                       | 25                                      | 27                                           | <.001   |
| Median income level in<br>the HC service area,<br>euros<br>(mean, SD) <sup>2</sup> | 17203<br>(2556)   | 15660<br>(3057)                             | 16097<br>(756)                           | 18951<br>(2166)                         | 18280<br>(2301)                              | <.001   |
| Unemployment rate<br>(mean, SD) <sup>2</sup>                                       | 7<br>(2.9)        | 7<br>(3.3)                                  | 10<br>(1.6)                              | 4<br>(0.8)                              | 6<br>(1.2)                                   | <.001   |

1)  $\chi^2$ -test

2) 1-way ANOVA

3) Low demands and high control

4) Low demands and low control

5) High demands and high control

6) High demands and low control

Table 2. Patient, organization and service area characteristics in primary care health centres (HCs)

varying in supervisor support.

| Supervisor support in primary care health centre (HC)                  |                   |                             |                                  |                              |         |
|------------------------------------------------------------------------|-------------------|-----------------------------|----------------------------------|------------------------------|---------|
|                                                                        | All HCs<br>(N=18) | Low support<br>HCs<br>(n=6) | Moderate<br>support HCs<br>(n=6) | High<br>support HCs<br>(n=6) | p-value |
| <i>Patient characteristics</i>                                         |                   |                             |                                  |                              |         |
| Percentage of men <sup>1</sup>                                         | 51                | 48                          | 54                               | 52                           | <.001   |
| Age (mean/SD) <sup>2</sup>                                             | 67 (11.2)         | 67 (11.3)                   | 66 (11.0)                        | 65 (11.6)                    | <.001   |
| HbA1c-value<br>(mean/SD) <sup>2</sup>                                  | 7.1 (1.2)         | 7.1 (1.3)                   | 7.1 (1.1)                        | 7.0 (1.1)                    | .082    |
| Patients with poor<br>glycaemic control<br>(HbA1c≥7%) (%) <sup>1</sup> | 43                | 44                          | 44                               | 41                           | .076    |
| N                                                                      | 8975              | 3911                        | 3194                             | 1870                         |         |
| <i>Organization characteristics</i>                                    |                   |                             |                                  |                              |         |
| Temporary employees<br>(%) <sup>1</sup>                                | 22                | 12                          | 31                               | 26                           | <.001   |
| Staff sickness absence<br>days (mean/SD) <sup>2</sup>                  | 14 (5.3)          | 15 (4.4)                    | 14 (4.5)                         | 10 (6.6)                     | <.001   |
| <i>Socioeconomic composition of HC service area</i>                    |                   |                             |                                  |                              |         |
| Percentage of the lowest<br>educational level <sup>1</sup>             | 27                | 28                          | 26                               | 25                           | <.001   |
| Median income level,<br>euros (mean, SD) <sup>2</sup>                  | 17203<br>(2556)   | 15173<br>(1510)             | 18971<br>(2009)                  | 18429<br>(2055)              | <.001   |
| Unemployment rate<br>(mean/SD) <sup>2</sup>                            | 7<br>(2.9)        | 10<br>(1.4)                 | 5<br>(1.4)                       | 5<br>(0.6)                   | <.001   |

1)  $\chi^2$ -test

2) 1-way ANOVA

Table 3. Level of perceived job strain among the health care personnel (doctors and nurses) as a predictor of poor glycaemic control indicator (HbA1c $\geq$ 7%) in patients with type 2 diabetes (N=8975) in primary care health centres (HCs, N=18).

| Job strain in the HC  | Unadjusted model    |         | Model I*            |         | Model II**          |         | Model III***        |         |
|-----------------------|---------------------|---------|---------------------|---------|---------------------|---------|---------------------|---------|
|                       | OR (95% CI)         | p-value |
| <i>Fixed effects</i>  |                     |         |                     |         |                     |         |                     |         |
| Low strain job        | 1.00                |         | 1.00                |         | 1.00                |         | 1.00                |         |
| Passive job           | 0.96<br>(0.72-1.27) | 0.752   | 0.96<br>(0.72-1.27) | 0.760   | 0.97<br>(0.70-1.36) | 0.871   | 1.08<br>(0.86-1.36) | 0.497   |
| Active job            | 0.89<br>(0.68-1.18) | 0.430   | 0.89<br>(0.67-1.19) | 0.438   | 0.91<br>(0.69-1.20) | 0.484   | 1.17<br>(0.96-1.43) | 0.114   |
| High strain job       | 1.08<br>(0.80-1.47) | 0.603   | 1.09<br>(0.80-1.48) | 0.586   | 1.10<br>(0.78-1.56) | 0.572   | 1.44<br>(1.12-1.86) | 0.004   |
| <i>Random effects</i> |                     |         |                     |         |                     |         |                     |         |
| HC variance           | 0.04                |         | 0.04                |         | 0.04                |         | 0.01                |         |
| (SE)                  | 0.05                |         | 0.05                |         | 0.04                |         | 0.02                |         |

Multilevel regression analysis

\*Adjusted for patient characteristics (sex and age)

\*\*Adjusted as model I + organization characteristics (the percentage of temporary employees and the mean rate of sickness absence days in the HC)

\*\*\* Adjusted as model II + HC service area characteristics (educational level of the residents, median income and unemployment rate)

Table 4. Level of perceived job strain among the health care personnel (doctors and nurses) as a predictor of poor glycaemic control indicator (HbA1c $\geq$ 8%) in patients with type 2 diabetes (N=8975) in primary care health centres (HCs, N=18).

| Job strain in the HC  | Unadjusted model |         | Model I*         |         | Model II**       |         | Model III***     |         |
|-----------------------|------------------|---------|------------------|---------|------------------|---------|------------------|---------|
|                       | OR (95% CI)      | p-value |
| <i>Fixed effects</i>  |                  |         |                  |         |                  |         |                  |         |
| Low strain job        | 1.00             |         | 1.00             |         | 1.00             |         | 1.00             |         |
| Passive job           | 1.06 (0.72-1.58) | 0.764   | 1.07 (0.73-1.57) | 0.742   | 1.08 (0.71-1.64) | 0.725   | 1.16 (0.89-1.51) | 0.287   |
| Active job            | 0.84 (0.57-1.25) | 0.394   | 0.83 (0.57-1.22) | 0.341   | 0.86 (0.60-1.23) | 0.408   | 1.23 (0.96-1.56) | 0.101   |
| High strain job       | 1.12 (0.73-1.71) | 0.609   | 1.09 (0.72-1.65) | 0.679   | 1.09 (0.71-1.69) | 0.684   | 1.57 (1.17-2.12) | 0.003   |
| <i>Random effects</i> |                  |         |                  |         |                  |         |                  |         |
| HC variance (SE)      | 0.07 (0.06)      |         | 0.07 (0.06)      |         | 0.06 (0.06)      |         | 0.01 (0.02)      |         |

Multilevel regression analysis

\*Adjusted for patient characteristics (sex and age)

\*\*Adjusted as model I + organization characteristics (the percentage of temporary employees and the mean rate of sickness absence days in the HC)

\*\*\* Adjusted as model II + HC service area characteristics (educational level of the residents, median income and unemployment rate)

Table 5. Level of perceived supervisor support among the health care personnel (doctors and nurses) as a predictor of poor glycaemic control indicator (HbA1c $\geq$ 7%) in patients with type 2 diabetes (N=8975) in primary care health centres (HCs, N=18).

| Supervisor support in the HCs | Unadjusted model    |         | Model I*            |         | Model II**          |         | Model III***        |         |
|-------------------------------|---------------------|---------|---------------------|---------|---------------------|---------|---------------------|---------|
|                               | OR (95% CI)         | p-value |
| <i>Fixed effects</i>          |                     |         |                     |         |                     |         |                     |         |
| <b>High support</b>           | 1.00                |         | 1.00                |         | 1.00                |         | 1.00                |         |
| <b>Medium support</b>         | 1.11<br>(0.86-1.43) | .415    | 1.11<br>(0.86-1.43) | .441    | 1.17<br>(0.90-1.53) | .249    | 1.14<br>(0.95-1.36) | .157    |
| <b>Low support</b>            | 1.13<br>(0.88-1.45) | .334    | 1.13<br>(0.88-1.45) | .353    | 1.10<br>(0.84-1.44) | .507    | 0.87<br>(0.65-1.16) | .344    |
| <i>Random effects</i>         |                     |         |                     |         |                     |         |                     |         |
| <b>HC variance</b>            | 0.04                |         | 0.04                |         | 0.03                |         | 0.01                |         |
| <b>(SE)</b>                   | 0.05                |         | 0.05                |         | 0.04                |         | 0.02                |         |

Multilevel regression analysis

\*Adjusted for patient characteristics (sex and age)

\*\*Adjusted as model I + organization characteristics (the percentage of temporary employees and the mean rate of sickness absence days in the HC)

\*\*\* Adjusted as model II + HC service area characteristics (educational level of the residents, median income and unemployment rate)

STROBE 2007 (v4) Statement—Checklist of items that should be included in reports of *cross-sectional studies*

| Section/Topic                | Item # | Recommendation                                                                                                                                                                       | Reported on page #                                  |
|------------------------------|--------|--------------------------------------------------------------------------------------------------------------------------------------------------------------------------------------|-----------------------------------------------------|
| Title and abstract           | 1      | (a) Indicate the study's design with a commonly used term in the title or the abstract                                                                                               | 1                                                   |
|                              |        | (b) Provide in the abstract an informative and balanced summary of what was done and what was found                                                                                  | 2                                                   |
| <b>Introduction</b>          |        |                                                                                                                                                                                      |                                                     |
| Background/rationale         | 2      | Explain the scientific background and rationale for the investigation being reported                                                                                                 | 4-5                                                 |
| Objectives                   | 3      | State specific objectives, including any prespecified hypotheses                                                                                                                     | 5                                                   |
| <b>Methods</b>               |        |                                                                                                                                                                                      |                                                     |
| Study design                 | 4      | Present key elements of study design early in the paper                                                                                                                              | 5-6                                                 |
| Setting                      | 5      | Describe the setting, locations, and relevant dates, including periods of recruitment, exposure, follow-up, and data collection                                                      | 5-6                                                 |
| Participants                 | 6      | (a) Give the eligibility criteria, and the sources and methods of selection of participants                                                                                          | 5-6                                                 |
| Variables                    | 7      | Clearly define all outcomes, exposures, predictors, potential confounders, and effect modifiers. Give diagnostic criteria, if applicable                                             | 6-7                                                 |
| Data sources/<br>measurement | 8*     | For each variable of interest, give sources of data and details of methods of assessment (measurement). Describe comparability of assessment methods if there is more than one group | 6-7                                                 |
| Bias                         | 9      | Describe any efforts to address potential sources of bias                                                                                                                            | 6 (all patients with type 2 diabetes were included) |
| Study size                   | 10     | Explain how the study size was arrived at                                                                                                                                            | 5-6                                                 |
| Quantitative variables       | 11     | Explain how quantitative variables were handled in the analyses. If applicable, describe which groupings were chosen and why                                                         | 6-7                                                 |
| Statistical methods          | 12     | (a) Describe all statistical methods, including those used to control for confounding                                                                                                | 7-8                                                 |
|                              |        | (b) Describe any methods used to examine subgroups and interactions                                                                                                                  |                                                     |
|                              |        | (c) Explain how missing data were addressed                                                                                                                                          | 8                                                   |
|                              |        | (d) If applicable, describe analytical methods taking account of sampling strategy                                                                                                   |                                                     |

|                          |     |                                                                                                                                                                                                                                                                                                                                                                                                               |                          |
|--------------------------|-----|---------------------------------------------------------------------------------------------------------------------------------------------------------------------------------------------------------------------------------------------------------------------------------------------------------------------------------------------------------------------------------------------------------------|--------------------------|
|                          |     | (e) Describe any sensitivity analyses                                                                                                                                                                                                                                                                                                                                                                         |                          |
| <b>Results</b>           |     |                                                                                                                                                                                                                                                                                                                                                                                                               |                          |
| Participants             | 13* | (a) Report numbers of individuals at each stage of study—eg numbers potentially eligible, examined for eligibility, confirmed eligible, included in the study, completing follow-up, and analysed<br>(b) Give reasons for non-participation at each stage<br>(c) Consider use of a flow diagram                                                                                                               | 5-7, 15-18               |
| Descriptive data         | 14* | (a) Give characteristics of study participants (eg demographic, clinical, social) and information on exposures and potential confounders<br>(b) Indicate number of participants with missing data for each variable of interest                                                                                                                                                                               | 8, 15-16                 |
| Outcome data             | 15* | Report numbers of outcome events or summary measures                                                                                                                                                                                                                                                                                                                                                          |                          |
| Main results             | 16  | (a) Give unadjusted estimates and, if applicable, confounder-adjusted estimates and their precision (eg, 95% confidence interval). Make clear which confounders were adjusted for and why they were included<br>(b) Report category boundaries when continuous variables were categorized<br>(c) If relevant, consider translating estimates of relative risk into absolute risk for a meaningful time period | 8, 10, 15-18<br>6, 17-18 |
| Other analyses           | 17  | Report other analyses done—eg analyses of subgroups and interactions, and sensitivity analyses                                                                                                                                                                                                                                                                                                                |                          |
| <b>Discussion</b>        |     |                                                                                                                                                                                                                                                                                                                                                                                                               |                          |
| Key results              | 18  | Summarise key results with reference to study objectives                                                                                                                                                                                                                                                                                                                                                      | 8-9                      |
| Limitations              | 19  | Discuss limitations of the study, taking into account sources of potential bias or imprecision. Discuss both direction and magnitude of any potential bias                                                                                                                                                                                                                                                    | 10                       |
| Interpretation           | 20  | Give a cautious overall interpretation of results considering objectives, limitations, multiplicity of analyses, results from similar studies, and other relevant evidence                                                                                                                                                                                                                                    | 10                       |
| Generalisability         | 21  | Discuss the generalisability (external validity) of the study results                                                                                                                                                                                                                                                                                                                                         | 10-11                    |
| <b>Other information</b> |     |                                                                                                                                                                                                                                                                                                                                                                                                               |                          |
| Funding                  | 22  | Give the source of funding and the role of the funders for the present study and, if applicable, for the original study on which the present article is based                                                                                                                                                                                                                                                 | 11                       |

\*Give information separately for cases and controls in case-control studies and, if applicable, for exposed and unexposed groups in cohort and cross-sectional studies.

**Note:** An Explanation and Elaboration article discusses each checklist item and gives methodological background and published examples of transparent reporting. The STROBE checklist is best used in conjunction with this article (freely available on the Web sites of PLoS Medicine at <http://www.plosmedicine.org/>, Annals of Internal Medicine at <http://www.annals.org/>, and Epidemiology at <http://www.epidem.com/>). Information on the STROBE Initiative is available at [www.strobe-statement.org](http://www.strobe-statement.org).
